# Supplementary material for: Adipocyte-Derived Lipids Mediate Melanoma Progression via FATP Proteins
Source: Oxford University Press journal article supplement (doi:10.1158/2159-8290.cd-17-1371), 2018-06-14
Supplement: 21598290cd171371-sup-193456_3_supp_4775115_p95d5n.xlsx [file 21598290cd171371-sup-193456_3_supp_4775115_p95d5n.xlsx]

## Sheet: Coversheet
	TrueMass® Complex Lipid Panel
	Quantitative Units:	Micromolar (uM)
	Worksheet	Sheet Name		Data Type
	1	Coversheet		NA
	2	Lipid Class Concentrations		Quantitative
	3	Lipid Class Compositions		Mole%
	4	Species Concentrations		Quantitative
	5	Species Compositions		Mole%
	6	Fatty Acid Concentrations		Quantitative
	7	Fatty Acid Compositions		Mole%
	8	Methods		NA
	Abbreviation	Name	Group
	CE	Cholesteryl ester	Neutral Lipids
	TAG	Triacylglycerol
	DAG	Diacylglycerol
	FFA	Free fatty acid
	PC	Phosphatidylcholine	Phospholipids
	PE	Phosphatidylethanolamine
	PI	Phosphatidylinositol
	LPC	Lysophosphatidylcholine
	LPE	Lysophosphatidylethanolamine
	SM	Sphingomyelin	Sphingolipids
	CER	Ceramide
	HCER	Hexosylceramide
	LCER	Lactosylceramide
	DCER	Dihydroceramide
	Total	Total lipid in sample

## Sheet: Lipid Class Concentration
Complex Lipid Panel: Lipid Class Concentrations
Project Code:	MSKC-02-15TMTLT
CLIENT_IDENTIFIER	SAMPLE_NAME	GROUP_NAME	GROUP_NUMBER	CLIENT_MATRIX	SUBJECT_ID	CELL_LINE	COMMENT	TIME_POINT	BRADFORD_PROTEIN	SAMPLE_AMOUNT_MILLIONS	QUANTITATIVE_UNITS	CE	CER	DAG	DCER	FFA	HCER	LCER	LPC	LPE	PC	PE	PI	SM	TAG
ZMEL ALONE 1	MSKC-00045	Monoculture_MM	2	cells	zebrafish	ZMEL1_GFP	Zebrafish_Mel_Cell_Line	7_days	4.089	10	uM	0.41062	1.69939	12.828	0.307685	29.9716	2.74039	0.0384079	1.88734	3.62388	119.635	83.9005	4.03652	19.7698	13.3425
ZMEL ALONE 2	MSKC-00046	Monoculture_MM	2	cells	zebrafish	ZMEL1_GFP	Zebrafish_Mel_Cell_Line	7_days	1.84	10	uM	0.491535	1.90814	14.3849	0.393995	41.7799	2.3376	0.0356658	2.65993	6.35719	141.494	90.0538	3.375	24.5568	16.2968
ZMEL ALONE 3	MSKC-00047	Monoculture_MM	2	cells	zebrafish	ZMEL1_GFP	Zebrafish_Mel_Cell_Line	7_days	2.415	10	uM	0.422857	1.66345	12.4297	0.361739	35.0071	2.25602	0.0480435	2.21155	3.59242	124.083	82.1246	3.55733	22.9384	20.0509
ZMEL CC 1	MSKC-00048	Coculture_MM	2	cells	zebrafish	ZMEL1_GFP	Zebrafish_Mel_Cell_Line	7_days	5.049	10	uM	0.491756	1.65085	20.1381	0.306135	35.6709	5.90217	0.0866459	1.30168	1.38059	105.442	98.9024	3.46956	19.8653	44.5944
ZMEL CC 2	MSKC-00049	Coculture_MM	2	cells	zebrafish	ZMEL1_GFP	Zebrafish_Mel_Cell_Line	7_days	2.634	10	uM	0.751224	2.67261	18.137	0.499886	47.4985	5.55606	0.130581	2.47751	2.67053	131.383	115.196	3.52622	29.3868	41.5826
ZMEL CC 3	MSKC-00050	Coculture_MM	2	cells	zebrafish	ZMEL1_GFP	Zebrafish_Mel_Cell_Line	7_days	4.5	12	uM	0.645367	2.6491	30.1763	0.508933	43.3231	5.13585	0.114	1.21888	0.960417	107.967	117.699	4.60092	26.2742	133.18
											Average monoculture	0.441671	1.75699	13.2142	0.354473	35.5862	2.44467	0.0407057	2.25294	4.5245	128.404	85.3596	3.65628	22.4217	16.5634
											Average coculture	0.629449	2.32418	22.8171	0.438318	42.1642	5.53136	0.110409	1.66602	1.67051	114.931	110.599	3.86557	25.1754	73.119
											Fold change	1.42515	1.32282	1.72672	1.23653	1.18485	2.26262	2.71237	0.739487	0.369215	0.895074	1.29568	1.05724	1.12282	4.4145

## Sheet: Lipid Class Compositions
Complex Lipid Panel: Lipid Class Compositions (Mole%)
Project Code:	MSKC-02-15TMTLT
CLIENT_IDENTIFIER	SAMPLE_NAME	GROUP_NAME	GROUP_NUMBER	CLIENT_MATRIX	SUBJECT_ID	CELL_LINE	COMMENT	TIME_POINT	BRADFORD_PROTEIN	SAMPLE_AMOUNT_MILLIONS	QUANTITATIVE_UNITS	CE	CER	DAG	DCER	FFA	HCER	LCER	LPC	LPE	PC	PE	PI	SM	TAG
ZMEL ALONE 1	MSKC-00045	Monoculture_MM	2	cells	zebrafish	ZMEL1_GFP	Zebrafish_Mel_Cell_Line	7_days	4.089	10	mole %	0.1396	0.5776	4.3604	0.1046	10.1878	0.9315	0.0131	0.6415	1.2318	40.6656	28.519	1.3721	6.7201	4.5353
ZMEL ALONE 2	MSKC-00046	Monoculture_MM	2	cells	zebrafish	ZMEL1_GFP	Zebrafish_Mel_Cell_Line	7_days	1.84	10	mole %	0.142	0.5513	4.156	0.1138	12.0708	0.6754	0.0103	0.7685	1.8367	40.8794	26.0177	0.9751	7.0948	4.7083
ZMEL ALONE 3	MSKC-00047	Monoculture_MM	2	cells	zebrafish	ZMEL1_GFP	Zebrafish_Mel_Cell_Line	7_days	2.415	10	mole %	0.1361	0.5353	3.9999	0.1164	11.2655	0.726	0.0155	0.7117	1.1561	39.9305	26.4281	1.1448	7.3817	6.4525
ZMEL CC 1	MSKC-00048	Coculture_MM	2	cells	zebrafish	ZMEL1_GFP	Zebrafish_Mel_Cell_Line	7_days	5.049	10	mole %	0.145	0.4867	5.9369	0.0902	10.5161	1.74	0.0255	0.3837	0.407	31.0853	29.1573	1.0229	5.8565	13.1468
ZMEL CC 2	MSKC-00049	Coculture_MM	2	cells	zebrafish	ZMEL1_GFP	Zebrafish_Mel_Cell_Line	7_days	2.634	10	mole %	0.1871	0.6657	4.5177	0.1245	11.8312	1.3839	0.0325	0.6171	0.6652	32.7256	28.6936	0.8783	7.3198	10.3576
ZMEL CC 3	MSKC-00050	Coculture_MM	2	cells	zebrafish	ZMEL1_GFP	Zebrafish_Mel_Cell_Line	7_days	4.5	12	mole %	0.136	0.5583	6.3602	0.1073	9.1312	1.0825	0.024	0.2569	0.2024	22.7561	24.8073	0.9697	5.5378	28.0702
											Average monoculture	0.139233	0.554733	4.1721	0.1116	11.1747	0.777633	0.0129667	0.707233	1.4082	40.4918	26.9883	1.164	7.06553	5.23203
											Average coculture	0.156033	0.570233	5.60493	0.107333	10.4928	1.40213	0.0273333	0.419233	0.424867	28.8557	27.5527	0.956967	6.23803	17.1915
											Fold change	1.12066	1.02794	1.34343	0.961768	0.938981	1.80308	2.10797	0.592779	0.301709	0.712629	1.02092	0.822136	0.882882	3.28582

## Sheet: Species Concentrations
Complex Lipid Panel: Molecular Species Concentrations
Project Code:	MSKC-02-15TMTLT
												CE	CE	CE	CE	CE	CE	CE	CE	CE	CE	CE	CE	CE	CE	CE	CE	CE	CE	CE	CE	CE	CE	CE	CE	CE	CE	CER	CER	CER	CER	CER	CER	CER	CER	CER	CER	CER	CER
CLIENT_IDENTIFIER	SAMPLE_NAME	GROUP_NAME	GROUP_NUMBER	CLIENT_MATRIX	SUBJECT_ID	CELL_LINE	COMMENT	TIME_POINT	BRADFORD_PROTEIN	SAMPLE_AMOUNT_MILLIONS	QUANTITATIVE_UNITS	CE(12:0)	CE(14:0)	CE(14:1)	CE(15:0)	CE(16:0)	CE(16:1)	CE(17:0)	CE(18:0)	CE(18:1)	CE(18:2)	CE(18:3)	CE(18:4)	CE(20:0)	CE(20:1)	CE(20:2)	CE(20:3)	CE(20:4)	CE(20:5)	CE(22:0)	CE(22:1)	CE(22:2)	CE(22:4)	CE(22:5)	CE(22:6)	CE(24:0)	CE(24:1)	CER(14:0)	CER(16:0)	CER(18:0)	CER(18:1)	CER(20:0)	CER(20:1)	CER(22:0)	CER(22:1)	CER(24:0)	CER(24:1)	CER(26:0)	CER(26:1)
ZMEL ALONE 1	MSKC-00045	Monoculture_MM	2	cells	zebrafish	ZMEL1_GFP	Zebrafish_Mel_Cell_Line	7_days	4.089	10	uM		0.00970286		0.00608951	0.0701027	0.0279347	0.00546588	0.0198092	0.160547	0.0633162				0.0117938	0.0133346	0.00392517	0.0158474							0.00275128			0.0498166	0.598679	0.0798973	0.00465884	0.0178283	0.006438	0.0603448	0.0731108	0.0771643	0.713573	0.00262289	0.0152788
ZMEL ALONE 2	MSKC-00046	Monoculture_MM	2	cells	zebrafish	ZMEL1_GFP	Zebrafish_Mel_Cell_Line	7_days	1.84	10	uM		0.0137364			0.0938723	0.033913		0.0221739	0.191454	0.072962				0.00974185	0.0122283	0.00831522	0.0255978	0.00317935						0.00444294			0.0500136	0.641046	0.0713315	0.00427989	0.0136957	0.0072962	0.0522554	0.066644	0.0811957	0.896372	0.00293478	0.0210734
ZMEL ALONE 3	MSKC-00047	Monoculture_MM	2	cells	zebrafish	ZMEL1_GFP	Zebrafish_Mel_Cell_Line	7_days	2.415	10	uM		0.0102795		0.00689441	0.0806522	0.0203727		0.0182919	0.149907	0.0875776	0.00515528			0.0104348	0.0100621	0.00562112	0.0175776										0.0335404	0.50587	0.0538199	0.00326087	0.0115528	0.00540373	0.0429193	0.0527019	0.0664907	0.864286	0.00223602	0.0213665
ZMEL CC 1	MSKC-00048	Coculture_MM	2	cells	zebrafish	ZMEL1_GFP	Zebrafish_Mel_Cell_Line	7_days	5.049	10	uM		0.0113636		0.00631313	0.0878491	0.0925134	0.00524361	0.0274064	0.175045	0.0348485	0.00273321		0.00328283	0.00876411	0.0088978	0.00524361	0.0173054	0.00262923						0.00231729			0.1291	0.754947	0.16738	0.00515449	0.0364973	0.00925431	0.1	0.148425	0.0462715	0.246836	0.00169341	0.00531788
ZMEL CC 2	MSKC-00049	Coculture_MM	2	cells	zebrafish	ZMEL1_GFP	Zebrafish_Mel_Cell_Line	7_days	2.634	10	uM		0.0190774		0.0115604	0.127306	0.139379	0.00993736	0.0361902	0.249431	0.0702449	0.00620729			0.0132118	0.00697608	0.0111048	0.0330296	0.00404328		0.00398633			0.00395786	0.00560934			0.0993166	1.04653	0.148405	0.00538155	0.0393793	0.0105923	0.240063	0.242056	0.146669	0.679897	0.0030467	0.0112756
ZMEL CC 3	MSKC-00050	Coculture_MM	2	cells	zebrafish	ZMEL1_GFP	Zebrafish_Mel_Cell_Line	7_days	4.5	12	uM		0.0148167	0.00631667	0.0095	0.08115	0.20095	0.00661667	0.02165	0.19135	0.0527	0.00303333		0.00628333	0.0145833	0.00516667	0.00705	0.0183833			0.0058							0.152917	1.1192	0.1577	0.00666667	0.0428667	0.0228833	0.184217	0.386167	0.0911	0.47335	0.00258333	0.00946667
											Average monoculture	#DIV/0!	0.0112396	#DIV/0!	0.00649196	0.0815424	0.0274068	0.00546588	0.0200917	0.167302	0.0746186	0.00515528	#DIV/0!	#DIV/0!	0.0106568	0.011875	0.00595383	0.0196743	0.00317935	#DIV/0!	#DIV/0!	#DIV/0!	#DIV/0!	#DIV/0!	0.00359711	#DIV/0!	#DIV/0!	0.0444568	0.581865	0.0683496	0.00406653	0.0143589	0.00637931	0.0518398	0.0641522	0.0749502	0.824744	0.0025979	0.0192395
											Average coculture	#DIV/0!	0.0150859	0.00631667	0.0091245	0.0987685	0.144281	0.00726588	0.0284155	0.205275	0.0525978	0.00399128	#DIV/0!	0.00478308	0.0121864	0.00701352	0.00779947	0.0229061	0.00333626	#DIV/0!	0.00489317	#DIV/0!	#DIV/0!	0.00395786	0.00396332	#DIV/0!	#DIV/0!	0.127111	0.973558	0.157828	0.00573423	0.0395811	0.0142433	0.17476	0.258883	0.09468	0.466695	0.00244115	0.00868673
											Fold change	#DIV/0!	1.34221	#DIV/0!	1.40551	1.21125	5.26442	1.32931	1.41429	1.22697	0.704888	0.774212	#DIV/0!	#DIV/0!	1.14353	0.590613	1.30999	1.16427	1.04935	#DIV/0!	#DIV/0!	#DIV/0!	#DIV/0!	#DIV/0!	1.10181	#DIV/0!	#DIV/0!	2.8592	1.67317	2.30914	1.4101	2.75655	2.23273	3.37115	4.03544	1.26324	0.565866	0.939661	0.451504
[truncated: 1,050 more columns]

## Sheet: Species Compositions
Complex Lipid Panel: Molecular Species Compositions (Mole%)
Project Code:	MSKC-02-15TMTLT
												CE	CE	CE	CE	CE	CE	CE	CE	CE	CE	CE	CE	CE	CE	CE	CE	CE	CE	CE	CE	CE	CE	CE	CE	CE	CE	CER	CER	CER	CER	CER	CER	CER	CER	CER	CER	CER	CER
CLIENT_IDENTIFIER	SAMPLE_NAME	GROUP_NAME	GROUP_NUMBER	CLIENT_MATRIX	SUBJECT_ID	CELL_LINE	COMMENT	TIME_POINT	BRADFORD_PROTEIN	SAMPLE_AMOUNT_MILLIONS	QUANTITATIVE_UNITS	CE(12:0)	CE(14:0)	CE(14:1)	CE(15:0)	CE(16:0)	CE(16:1)	CE(17:0)	CE(18:0)	CE(18:1)	CE(18:2)	CE(18:3)	CE(18:4)	CE(20:0)	CE(20:1)	CE(20:2)	CE(20:3)	CE(20:4)	CE(20:5)	CE(22:0)	CE(22:1)	CE(22:2)	CE(22:4)	CE(22:5)	CE(22:6)	CE(24:0)	CE(24:1)	CER(14:0)	CER(16:0)	CER(18:0)	CER(18:1)	CER(20:0)	CER(20:1)	CER(22:0)	CER(22:1)	CER(24:0)	CER(24:1)	CER(26:0)	CER(26:1)
ZMEL ALONE 1	MSKC-00045	Monoculture_MM	2	cells	zebrafish	ZMEL1_GFP	Zebrafish_Mel_Cell_Line	7_days	4.089	10	mole %		2.3644		1.4844	17.0707	6.803	1.3327	4.8243	39.0966	15.4204				2.8737	3.2477	0.955	3.8582							0.6688			2.9317	35.2294	4.7017	0.2737	1.0492	0.3786	3.5506	4.3018	4.5405	41.9901	0.1538	0.8987
ZMEL ALONE 2	MSKC-00046	Monoculture_MM	2	cells	zebrafish	ZMEL1_GFP	Zebrafish_Mel_Cell_Line	7_days	1.84	10	mole %		2.7907			19.0944	6.899		4.5096	38.9457	14.847				1.9796	2.4864	1.6912	5.2051	0.649						0.9022			2.6216	33.5946	3.7374	0.2244	0.7173	0.3817	2.7391	3.492	4.2554	46.9774	0.1538	1.1053
ZMEL ALONE 3	MSKC-00047	Monoculture_MM	2	cells	zebrafish	ZMEL1_GFP	Zebrafish_Mel_Cell_Line	7_days	2.415	10	mole %		2.4342		1.6323	19.0712	4.8196		4.3243	35.4482	20.708	1.2215			2.4702	2.3822	1.3284	4.1599										2.0164	30.4106	3.2349	0.1956	0.6943	0.3253	2.5797	3.1684	3.9976	51.9575	0.1347	1.285
ZMEL CC 1	MSKC-00048	Coculture_MM	2	cells	zebrafish	ZMEL1_GFP	Zebrafish_Mel_Cell_Line	7_days	5.049	10	mole %		2.3106		1.2853	17.8642	18.8129	1.0651	5.5744	35.5964	7.0864	0.5572		0.6679	1.7814	1.8089	1.0656	3.5195	0.534						0.4702			7.8199	45.7307	10.1386	0.3118	2.2104	0.5607	6.0574	8.991	2.8033	14.9518	0.1025	0.322
ZMEL CC 2	MSKC-00049	Coculture_MM	2	cells	zebrafish	ZMEL1_GFP	Zebrafish_Mel_Cell_Line	7_days	2.634	10	mole %		2.5399		1.5393	16.9478	18.5539	1.322	4.818	33.2056	9.3492	0.8256			1.757	0.9269	1.4783	4.3951	0.5364		0.5304			0.5281	0.7464			3.7166	39.1576	5.5532	0.2009	1.4732	0.3968	8.9821	9.0565	5.4875	25.4395	0.1144	0.4216
ZMEL CC 3	MSKC-00050	Coculture_MM	2	cells	zebrafish	ZMEL1_GFP	Zebrafish_Mel_Cell_Line	7_days	4.5	12	mole %		2.2958	0.9794	1.4725	12.5746	31.1374	1.0264	3.3542	29.6489	8.167	0.4689		0.9733	2.2608	0.8002	1.0921	2.8489			0.8998							5.7724	42.2485	5.9527	0.2515	1.6181	0.8636	6.9542	14.5773	3.4387	17.868	0.0977	0.3572
											Average monoculture	#DIV/0!	2.52977	#DIV/0!	1.55835	18.4121	6.17387	1.3327	4.55273	37.8302	16.9918	1.2215	#DIV/0!	#DIV/0!	2.44117	2.70543	1.32487	4.40773	0.649	#DIV/0!	#DIV/0!	#DIV/0!	#DIV/0!	#DIV/0!	0.7855	#DIV/0!	#DIV/0!	2.52323	33.0782	3.89133	0.231233	0.820267	0.361867	2.95647	3.65407	4.2645	46.975	0.147433	1.09633
											Average coculture	#DIV/0!	2.3821	0.9794	1.43237	15.7955	22.8347	1.13783	4.5822	32.817	8.20087	0.617233	#DIV/0!	0.8206	1.93307	1.17867	1.212	3.58783	0.5352	#DIV/0!	0.7151	#DIV/0!	#DIV/0!	0.5281	0.6083	#DIV/0!	#DIV/0!	5.76963	42.3789	7.21483	0.254733	1.76723	0.607033	7.33123	10.8749	3.90983	19.4198	0.104867	0.366933
											Fold change	#DIV/0!	0.941628	#DIV/0!	0.919156	0.857889	3.69861	0.853781	1.00647	0.867481	0.482637	0.505308	#DIV/0!	#DIV/0!	0.791862	0.435666	0.914809	0.813986	0.824653	#DIV/0!	#DIV/0!	#DIV/0!	#DIV/0!	#DIV/0!	0.774411	#DIV/0!	#DIV/0!	2.2866	1.28117	1.85408	1.10163	2.15446	1.67751	2.47973	2.97612	0.916833	0.413406	0.711282	0.334691
[truncated: 1,050 more columns]

## Sheet: Fatty Acid Concentration
Complex Lipid Panel: Fatty Acid Concentrations
Project Code:	MSKC-02-15TMTLT
												CE	CE	CE	CE	CE	CE	CE	CE	CE	CE	CE	CE	CE	CE	CE	CE	CE	CE	CE	CE	CE	CE	CE	CE	CE	CER	CER	CER	CER	CER	CER	CER	CER	CER	CER	CER	CER	DAG
CLIENT_IDENTIFIER	SAMPLE_NAME	GROUP_NAME	GROUP_NUMBER	CLIENT_MATRIX	SUBJECT_ID	CELL_LINE	COMMENT	TIME_POINT	BRADFORD_PROTEIN	SAMPLE_AMOUNT_MILLIONS	QUANTITATIVE_UNITS	CE[FA12:0]	CE[FA14:0]	CE[FA14:1]	CE[FA15:0]	CE[FA16:0]	CE[FA16:1]	CE[FA17:0]	CE[FA18:0]	CE[FA18:1]	CE[FA18:2]	CE[FA18:3]	CE[FA18:4]	CE[FA20:0]	CE[FA20:1]	CE[FA20:2]	CE[FA20:3]	CE[FA20:4]	CE[FA20:5]	CE[FA22:0]	CE[FA22:1]	CE[FA22:2]	CE[FA22:4]	CE[FA22:5]	CE[FA22:6]	CE[FA24:0]	CE[FA24:1]	CER[FA14:0]	CER[FA16:0]	CER[FA18:0]	CER[FA18:1]	CER[FA20:0]	CER[FA20:1]	CER[FA22:0]	CER[FA22:1]	CER[FA24:0]	CER[FA24:1]	CER[FA26:0]	CER[FA26:1]
ZMEL ALONE 1	MSKC-00045	Monoculture_MM	2	cells	zebrafish	ZMEL1_GFP	Zebrafish_Mel_Cell_Line	7_days	4.089	10	uM		0.00970286		0.00608951	0.0701027	0.0279347	0.00546588	0.0198092	0.160547	0.0633162				0.0117938	0.0133346	0.00392517	0.0158474							0.00275128			0.0498166	0.598679	0.0798973	0.00465884	0.0178283	0.006438	0.0603448	0.0731108	0.0771643	0.713573	0.00262289	0.0152788
ZMEL ALONE 2	MSKC-00046	Monoculture_MM	2	cells	zebrafish	ZMEL1_GFP	Zebrafish_Mel_Cell_Line	7_days	1.84	10	uM		0.0137364			0.0938723	0.033913		0.0221739	0.191454	0.072962				0.00974185	0.0122283	0.00831522	0.0255978	0.00317935						0.00444294			0.0500136	0.641046	0.0713315	0.00427989	0.0136957	0.0072962	0.0522554	0.066644	0.0811957	0.896372	0.00293478	0.0210734
ZMEL ALONE 3	MSKC-00047	Monoculture_MM	2	cells	zebrafish	ZMEL1_GFP	Zebrafish_Mel_Cell_Line	7_days	2.415	10	uM		0.0102795		0.00689441	0.0806522	0.0203727		0.0182919	0.149907	0.0875776	0.00515528			0.0104348	0.0100621	0.00562112	0.0175776										0.0335404	0.50587	0.0538199	0.00326087	0.0115528	0.00540373	0.0429193	0.0527019	0.0664907	0.864286	0.00223602	0.0213665
ZMEL CC 1	MSKC-00048	Coculture_MM	2	cells	zebrafish	ZMEL1_GFP	Zebrafish_Mel_Cell_Line	7_days	5.049	10	uM		0.0113636		0.00631313	0.0878491	0.0925134	0.00524361	0.0274064	0.175045	0.0348485	0.00273321		0.00328283	0.00876411	0.0088978	0.00524361	0.0173054	0.00262923						0.00231729			0.1291	0.754947	0.16738	0.00515449	0.0364973	0.00925431	0.1	0.148425	0.0462715	0.246836	0.00169341	0.00531788
ZMEL CC 2	MSKC-00049	Coculture_MM	2	cells	zebrafish	ZMEL1_GFP	Zebrafish_Mel_Cell_Line	7_days	2.634	10	uM		0.0190774		0.0115604	0.127306	0.139379	0.00993736	0.0361902	0.249431	0.0702449	0.00620729			0.0132118	0.00697608	0.0111048	0.0330296	0.00404328		0.00398633			0.00395786	0.00560934			0.0993166	1.04653	0.148405	0.00538155	0.0393793	0.0105923	0.240063	0.242056	0.146669	0.679897	0.0030467	0.0112756
ZMEL CC 3	MSKC-00050	Coculture_MM	2	cells	zebrafish	ZMEL1_GFP	Zebrafish_Mel_Cell_Line	7_days	4.5	12	uM		0.0148167	0.00631667	0.0095	0.08115	0.20095	0.00661667	0.02165	0.19135	0.0527	0.00303333		0.00628333	0.0145833	0.00516667	0.00705	0.0183833			0.0058							0.152917	1.1192	0.1577	0.00666667	0.0428667	0.0228833	0.184217	0.386167	0.0911	0.47335	0.00258333	0.00946667
[truncated: 238 more columns]

## Sheet: Fatty Acid Compositions
Complex Lipid Panel: Fatty Acid Compositions (Mole%)
Project Code:	MSKC-02-15TMTLT
												CE	CE	CE	CE	CE	CE	CE	CE	CE	CE	CE	CE	CE	CE	CE	CE	CE	CE	CE	CE	CE	CE	CE	CE	CE	CE	CER	CER	CER	CER	CER	CER	CER	CER	CER	CER	CER	CER
CLIENT_IDENTIFIER	SAMPLE_NAME	GROUP_NAME	GROUP_NUMBER	CLIENT_MATRIX	SUBJECT_ID	CELL_LINE	COMMENT	TIME_POINT	BRADFORD_PROTEIN	SAMPLE_AMOUNT_MILLIONS	QUANTITATIVE_UNITS	CE[FA12:0]	CE[FA14:0]	CE[FA14:1]	CE[FA15:0]	CE[FA16:0]	CE[FA16:1]	CE[FA17:0]	CE[FA18:0]	CE[FA18:1]	CE[FA18:2]	CE[FA18:3]	CE[FA18:4]	CE[FA20:0]	CE[FA20:1]	CE[FA20:2]	CE[FA20:3]	CE[FA20:4]	CE[FA20:5]	CE[FA22:0]	CE[FA22:1]	CE[FA22:2]	CE[FA22:4]	CE[FA22:5]	CE[FA22:6]	CE[FA24:0]	CE[FA24:1]	CER[FA14:0]	CER[FA16:0]	CER[FA18:0]	CER[FA18:1]	CER[FA20:0]	CER[FA20:1]	CER[FA22:0]	CER[FA22:1]	CER[FA24:0]	CER[FA24:1]	CER[FA26:0]	CER[FA26:1]
ZMEL ALONE 1	MSKC-00045	Monoculture_MM	2	cells	zebrafish	ZMEL1_GFP	Zebrafish_Mel_Cell_Line	7_days	4.089	10	mole %		2.3644		1.4844	17.0707	6.803	1.3327	4.8243	39.0966	15.4204				2.8737	3.2477	0.955	3.8582							0.6688			2.9317	35.2294	4.7017	0.2737	1.0492	0.3786	3.5506	4.3018	4.5405	41.9901	0.1538	0.8987
ZMEL ALONE 2	MSKC-00046	Monoculture_MM	2	cells	zebrafish	ZMEL1_GFP	Zebrafish_Mel_Cell_Line	7_days	1.84	10	mole %		2.7907			19.0944	6.899		4.5096	38.9457	14.847				1.9796	2.4864	1.6912	5.2051	0.649						0.9022			2.6216	33.5946	3.7374	0.2244	0.7173	0.3817	2.7391	3.492	4.2554	46.9774	0.1538	1.1053
ZMEL ALONE 3	MSKC-00047	Monoculture_MM	2	cells	zebrafish	ZMEL1_GFP	Zebrafish_Mel_Cell_Line	7_days	2.415	10	mole %		2.4342		1.6323	19.0712	4.8196		4.3243	35.4482	20.708	1.2215			2.4702	2.3822	1.3284	4.1599										2.0164	30.4106	3.2349	0.1956	0.6943	0.3253	2.5797	3.1684	3.9976	51.9575	0.1347	1.285
ZMEL CC 1	MSKC-00048	Coculture_MM	2	cells	zebrafish	ZMEL1_GFP	Zebrafish_Mel_Cell_Line	7_days	5.049	10	mole %		2.3106		1.2853	17.8642	18.8129	1.0651	5.5744	35.5964	7.0864	0.5572		0.6679	1.7814	1.8089	1.0656	3.5195	0.534						0.4702			7.8199	45.7307	10.1386	0.3118	2.2104	0.5607	6.0574	8.991	2.8033	14.9518	0.1025	0.322
ZMEL CC 2	MSKC-00049	Coculture_MM	2	cells	zebrafish	ZMEL1_GFP	Zebrafish_Mel_Cell_Line	7_days	2.634	10	mole %		2.5399		1.5393	16.9478	18.5539	1.322	4.818	33.2056	9.3492	0.8256			1.757	0.9269	1.4783	4.3951	0.5364		0.5304			0.5281	0.7464			3.7166	39.1576	5.5532	0.2009	1.4732	0.3968	8.9821	9.0565	5.4875	25.4395	0.1144	0.4216
ZMEL CC 3	MSKC-00050	Coculture_MM	2	cells	zebrafish	ZMEL1_GFP	Zebrafish_Mel_Cell_Line	7_days	4.5	12	mole %		2.2958	0.9794	1.4725	12.5746	31.1374	1.0264	3.3542	29.6489	8.167	0.4689		0.9733	2.2608	0.8002	1.0921	2.8489			0.8998							5.7724	42.2485	5.9527	0.2515	1.6181	0.8636	6.9542	14.5773	3.4387	17.868	0.0977	0.3572
[truncated: 238 more columns]
