# Supplementary material for: Adipocyte-Derived Lipids Mediate Melanoma Progression via FATP Proteins
Source: Oxford University Press journal article supplement (doi:10.1158/2159-8290.cd-17-1371), 2018-06-14
Supplement: 21598290cd171371-sup-193456_3_supp_4775120_p95d5m.xlsx [file 21598290cd171371-sup-193456_3_supp_4775120_p95d5m.xlsx]

## Sheet: Coversheet
	TrueMass® Complex Lipid Panel
	Quantitative Units:	Micromolar (uM)
	Worksheet	Sheet Name		Data Type
	1	Coversheet		NA
	2	Lipid Class Concentrations		Quantitative
	3	Lipid Class Compositions		Mole%
	4	Species Concentrations		Quantitative
	5	Species Compositions		Mole%
	6	Fatty Acid Concentrations		Quantitative
	7	Fatty Acid Compositions		Mole%
	8	Methods		NA
	Abbreviation	Name	Group
	CE	Cholesteryl ester	Neutral Lipids
	TAG	Triacylglycerol
	DAG	Diacylglycerol
	FFA	Free fatty acid
	PC	Phosphatidylcholine	Phospholipids
	PE	Phosphatidylethanolamine
	PI	Phosphatidylinositol
	LPC	Lysophosphatidylcholine
	LPE	Lysophosphatidylethanolamine
	SM	Sphingomyelin	Sphingolipids
	CER	Ceramide
	HCER	Hexosylceramide
	LCER	Lactosylceramide
	DCER	Dihydroceramide
	Total	Total lipid in sample

## Sheet: Lipid Class Concentration
Complex Lipid Panel: Lipid Class Concentrations
Project Code:	MSKC-02-15TMTLT
CLIENT_IDENTIFIER	SAMPLE_NAME	GROUP_NAME	GROUP_NUMBER	CLIENT_MATRIX	SUBJECT_ID	CELL_LINE	COMMENT	TIME_POINT	BRADFORD_PROTEIN	SAMPLE_AMOUNT_MILLIONS	QUANTITATIVE_UNITS	CE	CER	DAG	DCER	FFA	HCER	LCER	LPC	LPE	PC	PE	PI	SM	TAG
ZMEL DMEM 1	MSKC-00042	Monoculture_DMEM10	2	cells	zebrafish	ZMEL1_GFP	Zebrafish_Mel_Cell_Line	NA	5.914	10	uM	0.370092	1.37852	10.9668	0.233738	20.1573	2.23483	0.0515387	2.25411	1.85142	115.94	101.561	4.60071	18.3645	11.5078
ZMEL DMEM 2	MSKC-00043	Monoculture_DMEM10	2	cells	zebrafish	ZMEL1_GFP	Zebrafish_Mel_Cell_Line	NA	4.593	10	uM	0.231532	1.69394	12.1086	0.289353	24.356	0.805013	0.0410679	1.5606	0.892113	106.08	71.9371	3.44363	13.8766	11.021
ZMEL DMEM 3	MSKC-00044	Monoculture_DMEM10	2	cells	zebrafish	ZMEL1_GFP	Zebrafish_Mel_Cell_Line	NA	4.325	10	uM	0.212844	2.18785	12.9474	0.310509	25.2458	0.879121	0.0417225	1.6654	2.62791	107.337	69.6003	3.36831	12.8132	11.7398
ZMEL FISH 1	MSKC-00051	Post_Transplant	2	cells	zebrafish	ZMEL1_GFP	Zebrafish_Mel_Cell_Line	21_days_post_transplant	4.51	10	uM	0.657323	1.43019	7.37664	0.644983	27.6606	4.09004	0.102805	1.13235	0.332212	119.904	105.29	3.40226	10.555	7.75377
ZMEL FISH 2	MSKC-00052	Post_Transplant	2	cells	zebrafish	ZMEL1_GFP	Zebrafish_Mel_Cell_Line	21_days_post_transplant	2.757	10	uM	0.70068	1.25155	7.90775	0.579325	26.1174	1.09135	0.0797334	1.3463	0.77296	135.098	120.036	3.138	11.0376	11.0985
ZMEL FISH 3	MSKC-00053	Post_Transplant	2	cells	zebrafish	ZMEL1_GFP	Zebrafish_Mel_Cell_Line	21_days_post_transplant	3.389	10	uM	1.44611	1.30855	8.86801	0.606661	31.5243	2.54349	0.105341	1.80733	0.53954	136.996	126.425	3.38257	10.5723	10.3369
											Average in vitro DMEM	0.271489	1.75344	12.0076	0.277867	23.2531	1.30632	0.0447764	1.8267	1.79048	109.786	81.0327	3.80421	15.0181	11.4229
											Average in vivo after transplant	0.934705	1.3301	8.0508	0.610323	28.4341	2.57496	0.0959597	1.42866	0.548237	130.666	117.25	3.30761	10.7216	9.72973
											Fold change	3.44288	0.758565	0.670477	2.19646	1.22281	1.97115	2.14309	0.782097	0.306195	1.19019	1.44695	0.869459	0.713912	0.851777

## Sheet: Lipid Class Compositions
Complex Lipid Panel: Lipid Class Compositions (Mole%)
Project Code:	MSKC-02-15TMTLT
CLIENT_IDENTIFIER	SAMPLE_NAME	GROUP_NAME	GROUP_NUMBER	CLIENT_MATRIX	SUBJECT_ID	CELL_LINE	COMMENT	TIME_POINT	BRADFORD_PROTEIN	SAMPLE_AMOUNT_MILLIONS	QUANTITATIVE_UNITS	CE	CER	DAG	DCER	FFA	HCER	LCER	LPC	LPE	PC	PE	PI	SM	TAG
ZMEL DMEM 1	MSKC-00042	Monoculture_DMEM10	2	cells	zebrafish	ZMEL1_GFP	Zebrafish_Mel_Cell_Line	NA	5.914	10	mole %	0.127	0.473	3.7625	0.0802	6.9157	0.7667	0.0177	0.7734	0.6352	39.7774	34.8441	1.5784	6.3006	3.9481
ZMEL DMEM 2	MSKC-00043	Monoculture_DMEM10	2	cells	zebrafish	ZMEL1_GFP	Zebrafish_Mel_Cell_Line	NA	4.593	10	mole %	0.0932	0.6821	4.8759	0.1165	9.8077	0.3242	0.0165	0.6284	0.3592	42.7162	28.9676	1.3867	5.5878	4.4379
ZMEL DMEM 3	MSKC-00044	Monoculture_DMEM10	2	cells	zebrafish	ZMEL1_GFP	Zebrafish_Mel_Cell_Line	NA	4.325	10	mole %	0.0848	0.8717	5.1588	0.1237	10.059	0.3503	0.0166	0.6636	1.0471	42.7677	27.7317	1.3421	5.1053	4.6776
ZMEL FISH 1	MSKC-00051	Post_Transplant	2	cells	zebrafish	ZMEL1_GFP	Zebrafish_Mel_Cell_Line	21_days_post_transplant	4.51	10	mole %	0.2264	0.4926	2.5408	0.2222	9.5272	1.4087	0.0354	0.39	0.1144	41.2989	36.2654	1.1718	3.6355	2.6707
ZMEL FISH 2	MSKC-00052	Post_Transplant	2	cells	zebrafish	ZMEL1_GFP	Zebrafish_Mel_Cell_Line	21_days_post_transplant	2.757	10	mole %	0.2188	0.3908	2.4692	0.1809	8.1552	0.3408	0.0249	0.4204	0.2414	42.1845	37.4813	0.9798	3.4465	3.4655
ZMEL FISH 3	MSKC-00053	Post_Transplant	2	cells	zebrafish	ZMEL1_GFP	Zebrafish_Mel_Cell_Line	21_days_post_transplant	3.389	10	mole %	0.4298	0.3889	2.6357	0.1803	9.3693	0.7559	0.0313	0.5372	0.1604	40.7167	37.5748	1.0053	3.1422	3.0722
											Average in vitro DMEM	0.101667	0.6756	4.59907	0.1068	8.92747	0.4804	0.0169333	0.688467	0.6805	41.7538	30.5145	1.43573	5.66457	4.35453
											Average in vivo after transplant	0.291667	0.4241	2.54857	0.194467	9.01723	0.835133	0.0305333	0.4492	0.172067	41.4	37.1072	1.0523	3.40807	3.06947
											Fold change	2.86885	0.627738	0.554149	1.82085	1.01006	1.73841	1.80315	0.652464	0.252853	0.991528	1.21605	0.732936	0.601646	0.70489

## Sheet: Species Concentrations
Complex Lipid Panel: Molecular Species Concentrations
Project Code:	MSKC-02-15TMTLT
												CE	CE	CE	CE	CE	CE	CE	CE	CE	CE	CE	CE	CE	CE	CE	CE	CE	CE	CE	CE	CE	CE	CE	CE	CE	CE	CER	CER	CER	CER	CER	CER	CER	CER	CER	CER	CER	CER
CLIENT_IDENTIFIER	SAMPLE_NAME	GROUP_NAME	GROUP_NUMBER	CLIENT_MATRIX	SUBJECT_ID	CELL_LINE	COMMENT	TIME_POINT	BRADFORD_PROTEIN	SAMPLE_AMOUNT_MILLIONS	QUANTITATIVE_UNITS	CE(12:0)	CE(14:0)	CE(14:1)	CE(15:0)	CE(16:0)	CE(16:1)	CE(17:0)	CE(18:0)	CE(18:1)	CE(18:2)	CE(18:3)	CE(18:4)	CE(20:0)	CE(20:1)	CE(20:2)	CE(20:3)	CE(20:4)	CE(20:5)	CE(22:0)	CE(22:1)	CE(22:2)	CE(22:4)	CE(22:5)	CE(22:6)	CE(24:0)	CE(24:1)	CER(14:0)	CER(16:0)	CER(18:0)	CER(18:1)	CER(20:0)	CER(20:1)	CER(22:0)	CER(22:1)	CER(24:0)	CER(24:1)	CER(26:0)	CER(26:1)
ZMEL DMEM 1	MSKC-00042	Monoculture_DMEM10	2	cells	zebrafish	ZMEL1_GFP	Zebrafish_Mel_Cell_Line	NA	5.914	10	uM		0.00764711		0.00480639	0.0616588	0.0234486	0.00651843	0.0175389	0.166283	0.0416469	0.00234613			0.0064677	0.00637893	0.00442594	0.0132017	0.00182617					0.00161059	0.00427376			0.0270122	0.527333	0.0634976	0.00277731	0.0204684	0.00309435	0.0925262	0.0327951	0.0987022	0.49223	0.00324653	0.0148377
ZMEL DMEM 2	MSKC-00043	Monoculture_DMEM10	2	cells	zebrafish	ZMEL1_GFP	Zebrafish_Mel_Cell_Line	NA	4.593	10	uM		0.00821359		0.0060418	0.050147	0.0192848	0.00502939	0.0111202	0.080111	0.0302907	0.00236773			0.00453952		0.00287394	0.00942195							0.00207381			0.033083	0.573138	0.0732528	0.00352711	0.0172436	0.00413129	0.0776617	0.0483018	0.0879654	0.753968	0.0029066	0.0187459
ZMEL DMEM 3	MSKC-00044	Monoculture_DMEM10	2	cells	zebrafish	ZMEL1_GFP	Zebrafish_Mel_Cell_Line	NA	4.325	10	uM		0.00584393		0.00586127	0.0407514	0.0161792	0.00497688	0.0103006	0.0789017	0.0277977	0.00327746			0.00374567		0.00324277	0.00919075							0.00280925			0.0391908	0.753746	0.0926358	0.00379769	0.0244509	0.00376301	0.0972659	0.0587341	0.106769	0.982526	0.00339884	0.0216069
ZMEL FISH 1	MSKC-00051	Post_Transplant	2	cells	zebrafish	ZMEL1_GFP	Zebrafish_Mel_Cell_Line	21_days_post_transplant	4.51	10	uM		0.00606984		0.0112084	0.0838636	0.0296508	0.00540466	0.027439	0.146225	0.0636253	0.00698448	0.00242794		0.0144346	0.00244457	0.00808204	0.028204	0.0452328		0.00304324		0.00382483	0.027439	0.141702			0.0350222	0.697134	0.0522506	0.00196231	0.0248448	0.00334257	0.0876885	0.0446508	0.0863415	0.372323	0.00548781	0.0191408
ZMEL FISH 2	MSKC-00052	Post_Transplant	2	cells	zebrafish	ZMEL1_GFP	Zebrafish_Mel_Cell_Line	21_days_post_transplant	2.757	10	uM		0.0122416		0.0062296	0.0994287	0.0320729	0.00680087	0.023531	0.145647	0.0696409	0.00791621	0.00244831	0.00788901	0.0124864		0.0119151	0.0433351	0.0565288		0.00519587		0.00413493	0.0265234	0.126741			0.0341948	0.545647	0.0289445		0.018716	0.00242111	0.0630849	0.0491023	0.0786997	0.403781	0.00584875	0.0211371
ZMEL FISH 3	MSKC-00053	Post_Transplant	2	cells	zebrafish	ZMEL1_GFP	Zebrafish_Mel_Cell_Line	21_days_post_transplant	3.389	10	uM		0.0158675		0.0135217	0.160822	0.0538654	0.011707	0.040897	0.292586	0.103548	0.0149823	0.00442608	0.00606374	0.0219976	0.00595308	0.0191428	0.0595972	0.130813		0.00613013		0.00845382	0.069578	0.40616			0.0287032	0.565565	0.0451461	0.00121717	0.0241664	0.00289909	0.107266	0.0445928	0.10014	0.363315	0.00739156	0.0181248
											Average in vitro DMEM	#DIV/0!	0.00723488	#DIV/0!	0.00556982	0.0508524	0.0196375	0.00550823	0.0129866	0.108432	0.0332451	0.00266377	#DIV/0!	#DIV/0!	0.00491763	0.00637893	0.00351422	0.0106048	0.00182617	#DIV/0!	#DIV/0!	#DIV/0!	#DIV/0!	0.00161059	0.00305227	#DIV/0!	#DIV/0!	0.0330953	0.618073	0.0764621	0.00336737	0.020721	0.00366288	0.0891513	0.0466103	0.0978121	0.742908	0.00318399	0.0183968
											Average in vivo after transplant	#DIV/0!	0.011393	#DIV/0!	0.0103199	0.114705	0.0385297	0.00797084	0.0306224	0.19482	0.0789381	0.009961	0.00310078	0.00697637	0.0163062	0.00419883	0.0130467	0.0437121	0.0775249	#DIV/0!	0.00478974	#DIV/0!	0.00547119	0.0411802	0.224867	#DIV/0!	#DIV/0!	0.03264	0.602782	0.0421137	0.00158974	0.0225757	0.00288759	0.0860132	0.0461153	0.0883938	0.379806	0.00624271	0.0194676
											Fold change	#DIV/0!	1.57473	#DIV/0!	1.85282	2.25564	1.96205	1.44708	2.35801	1.7967	2.37443	3.73943	#DIV/0!	#DIV/0!	3.31587	0.658233	3.71254	4.12192	42.452	#DIV/0!	#DIV/0!	#DIV/0!	#DIV/0!	25.5684	73.6722	#DIV/0!	#DIV/0!	0.986244	0.975261	0.550779	0.472102	1.08951	0.788338	0.9648	0.98938	0.90371	0.511243	1.96065	1.0582
[truncated: 1,050 more columns]

## Sheet: Species Compositions
Complex Lipid Panel: Molecular Species Compositions (Mole%)
Project Code:	MSKC-02-15TMTLT
												CE	CE	CE	CE	CE	CE	CE	CE	CE	CE	CE	CE	CE	CE	CE	CE	CE	CE	CE	CE	CE	CE	CE	CE	CE	CE	CER	CER	CER	CER	CER	CER	CER	CER	CER	CER	CER	CER
CLIENT_IDENTIFIER	SAMPLE_NAME	GROUP_NAME	GROUP_NUMBER	CLIENT_MATRIX	SUBJECT_ID	CELL_LINE	COMMENT	TIME_POINT	BRADFORD_PROTEIN	SAMPLE_AMOUNT_MILLIONS	QUANTITATIVE_UNITS	CE(12:0)	CE(14:0)	CE(14:1)	CE(15:0)	CE(16:0)	CE(16:1)	CE(17:0)	CE(18:0)	CE(18:1)	CE(18:2)	CE(18:3)	CE(18:4)	CE(20:0)	CE(20:1)	CE(20:2)	CE(20:3)	CE(20:4)	CE(20:5)	CE(22:0)	CE(22:1)	CE(22:2)	CE(22:4)	CE(22:5)	CE(22:6)	CE(24:0)	CE(24:1)	CER(14:0)	CER(16:0)	CER(18:0)	CER(18:1)	CER(20:0)	CER(20:1)	CER(22:0)	CER(22:1)	CER(24:0)	CER(24:1)	CER(26:0)	CER(26:1)
ZMEL DMEM 1	MSKC-00042	Monoculture_DMEM10	2	cells	zebrafish	ZMEL1_GFP	Zebrafish_Mel_Cell_Line	NA	5.914	10	mole %		2.0669		1.2986	16.6588	6.3368	1.7609	4.7374	44.9319	11.2531	0.6355			1.7487	1.7228	1.1967	3.5672	0.4941					0.436	1.1544			1.9593	38.2534	4.6063	0.2013	1.4851	0.2241	6.712	2.3786	7.1603	35.707	0.2359	1.0765
ZMEL DMEM 2	MSKC-00043	Monoculture_DMEM10	2	cells	zebrafish	ZMEL1_GFP	Zebrafish_Mel_Cell_Line	NA	4.593	10	mole %		3.5483		2.6085	21.6587	8.331	2.1738	4.806	34.5987	13.0799	1.0217			1.9603		1.2448	4.0706							0.8978			1.9532	33.8345	4.3249	0.2079	1.0184	0.2441	4.5844	2.8516	5.1926	44.51	0.1721	1.1063
ZMEL DMEM 3	MSKC-00044	Monoculture_DMEM10	2	cells	zebrafish	ZMEL1_GFP	Zebrafish_Mel_Cell_Line	NA	4.325	10	mole %		2.7469		2.7511	19.1422	7.5978	2.3398	4.8385	37.0721	13.057	1.5417			1.7566		1.5201	4.3143							1.3219			1.7912	34.4513	4.234	0.1733	1.1175	0.1721	4.4454	2.6845	4.8797	44.9079	0.1553	0.9879
ZMEL FISH 1	MSKC-00051	Post_Transplant	2	cells	zebrafish	ZMEL1_GFP	Zebrafish_Mel_Cell_Line	21_days_post_transplant	4.51	10	mole %		0.9224		1.7053	12.7593	4.5116	0.8215	4.1743	22.2457	9.6796	1.0621	0.3699		2.1963	0.3722	1.2305	4.2908	6.8817		0.4631		0.5822	4.1751	21.5565			2.4493	48.7438	3.6535	0.1367	1.7373	0.234	6.1307	3.1222	6.0375	26.0327	0.384	1.3384
ZMEL FISH 2	MSKC-00052	Post_Transplant	2	cells	zebrafish	ZMEL1_GFP	Zebrafish_Mel_Cell_Line	21_days_post_transplant	2.757	10	mole %		1.7461		0.8878	14.1907	4.5767	0.9701	3.359	20.7845	9.9402	1.1288	0.3497	1.1246	1.7815		1.7019	6.1835	8.0686		0.7423		0.5909	3.7838	18.0893			2.7314	43.5974	2.3135		1.4956	0.1931	5.0398	3.9238	6.2883	32.2617	0.4663	1.6893
ZMEL FISH 3	MSKC-00053	Post_Transplant	2	cells	zebrafish	ZMEL1_GFP	Zebrafish_Mel_Cell_Line	21_days_post_transplant	3.389	10	mole %		1.0969		0.9344	11.1215	3.7242	0.8102	2.8279	20.2321	7.1611	1.0358	0.3061	0.4201	1.5213	0.4111	1.3243	4.1205	9.0451		0.4239		0.5849	4.8116	28.0868			2.1938	43.221	3.4508	0.0938	1.8477	0.2212	8.1977	3.4076	7.6524	27.7647	0.5647	1.3847
											Average in vitro DMEM	#DIV/0!	2.78737	#DIV/0!	2.2194	19.1532	7.42187	2.0915	4.79397	38.8676	12.4633	1.0663	#DIV/0!	#DIV/0!	1.82187	1.7228	1.32053	3.98403	0.4941	#DIV/0!	#DIV/0!	#DIV/0!	#DIV/0!	0.436	1.1247	#DIV/0!	#DIV/0!	1.90123	35.5131	4.3884	0.194167	1.207	0.213433	5.24727	2.63823	5.7442	41.7083	0.187767	1.0569
											Average in vivo after transplant	#DIV/0!	1.25513	#DIV/0!	1.17583	12.6905	4.27083	0.867267	3.45373	21.0874	8.92697	1.07557	0.3419	0.77235	1.83303	0.39165	1.4189	4.86493	7.99847	#DIV/0!	0.5431	#DIV/0!	0.586	4.25683	22.5775	#DIV/0!	#DIV/0!	2.45817	45.1874	3.13927	0.11525	1.69353	0.2161	6.45607	3.48453	6.6594	28.6864	0.471667	1.4708
											Fold change	#DIV/0!	0.450294	#DIV/0!	0.529798	0.662577	0.575439	0.414663	0.720433	0.542546	0.716258	1.00869	#DIV/0!	#DIV/0!	1.00613	0.227333	1.07449	1.22111	16.188	#DIV/0!	#DIV/0!	#DIV/0!	#DIV/0!	9.76338	20.0743	#DIV/0!	#DIV/0!	1.29293	1.27242	0.715356	0.593562	1.40309	1.01249	1.23037	1.32078	1.15933	0.687786	2.51198	1.39162
[truncated: 1,050 more columns]

## Sheet: Fatty Acid Concentration
Complex Lipid Panel: Fatty Acid Concentrations
Project Code:	MSKC-02-15TMTLT
												CE	CE	CE	CE	CE	CE	CE	CE	CE	CE	CE	CE	CE	CE	CE	CE	CE	CE	CE	CE	CE	CE	CE	CE	CE	CER	CER	CER	CER	CER	CER	CER	CER	CER	CER	CER	CER	DAG
CLIENT_IDENTIFIER	SAMPLE_NAME	GROUP_NAME	GROUP_NUMBER	CLIENT_MATRIX	SUBJECT_ID	CELL_LINE	COMMENT	TIME_POINT	BRADFORD_PROTEIN	SAMPLE_AMOUNT_MILLIONS	QUANTITATIVE_UNITS	CE[FA12:0]	CE[FA14:0]	CE[FA14:1]	CE[FA15:0]	CE[FA16:0]	CE[FA16:1]	CE[FA17:0]	CE[FA18:0]	CE[FA18:1]	CE[FA18:2]	CE[FA18:3]	CE[FA18:4]	CE[FA20:0]	CE[FA20:1]	CE[FA20:2]	CE[FA20:3]	CE[FA20:4]	CE[FA20:5]	CE[FA22:0]	CE[FA22:1]	CE[FA22:2]	CE[FA22:4]	CE[FA22:5]	CE[FA22:6]	CE[FA24:0]	CE[FA24:1]	CER[FA14:0]	CER[FA16:0]	CER[FA18:0]	CER[FA18:1]	CER[FA20:0]	CER[FA20:1]	CER[FA22:0]	CER[FA22:1]	CER[FA24:0]	CER[FA24:1]	CER[FA26:0]	CER[FA26:1]
ZMEL DMEM 1	MSKC-00042	Monoculture_DMEM10	2	cells	zebrafish	ZMEL1_GFP	Zebrafish_Mel_Cell_Line	NA	5.914	10	uM		0.00764711		0.00480639	0.0616588	0.0234486	0.00651843	0.0175389	0.166283	0.0416469	0.00234613			0.0064677	0.00637893	0.00442594	0.0132017	0.00182617					0.00161059	0.00427376			0.0270122	0.527333	0.0634976	0.00277731	0.0204684	0.00309435	0.0925262	0.0327951	0.0987022	0.49223	0.00324653	0.0148377
ZMEL DMEM 2	MSKC-00043	Monoculture_DMEM10	2	cells	zebrafish	ZMEL1_GFP	Zebrafish_Mel_Cell_Line	NA	4.593	10	uM		0.00821359		0.0060418	0.050147	0.0192848	0.00502939	0.0111202	0.080111	0.0302907	0.00236773			0.00453952		0.00287394	0.00942195							0.00207381			0.033083	0.573138	0.0732528	0.00352711	0.0172436	0.00413129	0.0776617	0.0483018	0.0879654	0.753968	0.0029066	0.0187459
ZMEL DMEM 3	MSKC-00044	Monoculture_DMEM10	2	cells	zebrafish	ZMEL1_GFP	Zebrafish_Mel_Cell_Line	NA	4.325	10	uM		0.00584393		0.00586127	0.0407514	0.0161792	0.00497688	0.0103006	0.0789017	0.0277977	0.00327746			0.00374567		0.00324277	0.00919075							0.00280925			0.0391908	0.753746	0.0926358	0.00379769	0.0244509	0.00376301	0.0972659	0.0587341	0.106769	0.982526	0.00339884	0.0216069
ZMEL FISH 1	MSKC-00051	Post_Transplant	2	cells	zebrafish	ZMEL1_GFP	Zebrafish_Mel_Cell_Line	21_days_post_transplant	4.51	10	uM		0.00606984		0.0112084	0.0838636	0.0296508	0.00540466	0.027439	0.146225	0.0636253	0.00698448	0.00242794		0.0144346	0.00244457	0.00808204	0.028204	0.0452328		0.00304324		0.00382483	0.027439	0.141702			0.0350222	0.697134	0.0522506	0.00196231	0.0248448	0.00334257	0.0876885	0.0446508	0.0863415	0.372323	0.00548781	0.0191408
ZMEL FISH 2	MSKC-00052	Post_Transplant	2	cells	zebrafish	ZMEL1_GFP	Zebrafish_Mel_Cell_Line	21_days_post_transplant	2.757	10	uM		0.0122416		0.0062296	0.0994287	0.0320729	0.00680087	0.023531	0.145647	0.0696409	0.00791621	0.00244831	0.00788901	0.0124864		0.0119151	0.0433351	0.0565288		0.00519587		0.00413493	0.0265234	0.126741			0.0341948	0.545647	0.0289445		0.018716	0.00242111	0.0630849	0.0491023	0.0786997	0.403781	0.00584875	0.0211371
ZMEL FISH 3	MSKC-00053	Post_Transplant	2	cells	zebrafish	ZMEL1_GFP	Zebrafish_Mel_Cell_Line	21_days_post_transplant	3.389	10	uM		0.0158675		0.0135217	0.160822	0.0538654	0.011707	0.040897	0.292586	0.103548	0.0149823	0.00442608	0.00606374	0.0219976	0.00595308	0.0191428	0.0595972	0.130813		0.00613013		0.00845382	0.069578	0.40616			0.0287032	0.565565	0.0451461	0.00121717	0.0241664	0.00289909	0.107266	0.0445928	0.10014	0.363315	0.00739156	0.0181248
[truncated: 238 more columns]

## Sheet: Fatty Acid Compositions
Complex Lipid Panel: Fatty Acid Compositions (Mole%)
Project Code:	MSKC-02-15TMTLT
												CE	CE	CE	CE	CE	CE	CE	CE	CE	CE	CE	CE	CE	CE	CE	CE	CE	CE	CE	CE	CE	CE	CE	CE	CE	CE	CER	CER	CER	CER	CER	CER	CER	CER	CER	CER	CER	CER
CLIENT_IDENTIFIER	SAMPLE_NAME	GROUP_NAME	GROUP_NUMBER	CLIENT_MATRIX	SUBJECT_ID	CELL_LINE	COMMENT	TIME_POINT	BRADFORD_PROTEIN	SAMPLE_AMOUNT_MILLIONS	QUANTITATIVE_UNITS	CE[FA12:0]	CE[FA14:0]	CE[FA14:1]	CE[FA15:0]	CE[FA16:0]	CE[FA16:1]	CE[FA17:0]	CE[FA18:0]	CE[FA18:1]	CE[FA18:2]	CE[FA18:3]	CE[FA18:4]	CE[FA20:0]	CE[FA20:1]	CE[FA20:2]	CE[FA20:3]	CE[FA20:4]	CE[FA20:5]	CE[FA22:0]	CE[FA22:1]	CE[FA22:2]	CE[FA22:4]	CE[FA22:5]	CE[FA22:6]	CE[FA24:0]	CE[FA24:1]	CER[FA14:0]	CER[FA16:0]	CER[FA18:0]	CER[FA18:1]	CER[FA20:0]	CER[FA20:1]	CER[FA22:0]	CER[FA22:1]	CER[FA24:0]	CER[FA24:1]	CER[FA26:0]	CER[FA26:1]
ZMEL DMEM 1	MSKC-00042	Monoculture_DMEM10	2	cells	zebrafish	ZMEL1_GFP	Zebrafish_Mel_Cell_Line	NA	5.914	10	mole %		2.0669		1.2986	16.6588	6.3368	1.7609	4.7374	44.9319	11.2531	0.6355			1.7487	1.7228	1.1967	3.5672	0.4941					0.436	1.1544			1.9593	38.2534	4.6063	0.2013	1.4851	0.2241	6.712	2.3786	7.1603	35.707	0.2359	1.0765
ZMEL DMEM 2	MSKC-00043	Monoculture_DMEM10	2	cells	zebrafish	ZMEL1_GFP	Zebrafish_Mel_Cell_Line	NA	4.593	10	mole %		3.5483		2.6085	21.6587	8.331	2.1738	4.806	34.5987	13.0799	1.0217			1.9603		1.2448	4.0706							0.8978			1.9532	33.8345	4.3249	0.2079	1.0184	0.2441	4.5844	2.8516	5.1926	44.51	0.1721	1.1063
ZMEL DMEM 3	MSKC-00044	Monoculture_DMEM10	2	cells	zebrafish	ZMEL1_GFP	Zebrafish_Mel_Cell_Line	NA	4.325	10	mole %		2.7469		2.7511	19.1422	7.5978	2.3398	4.8385	37.0721	13.057	1.5417			1.7566		1.5201	4.3143							1.3219			1.7912	34.4513	4.234	0.1733	1.1175	0.1721	4.4454	2.6845	4.8797	44.9079	0.1553	0.9879
ZMEL FISH 1	MSKC-00051	Post_Transplant	2	cells	zebrafish	ZMEL1_GFP	Zebrafish_Mel_Cell_Line	21_days_post_transplant	4.51	10	mole %		0.9224		1.7053	12.7593	4.5116	0.8215	4.1743	22.2457	9.6796	1.0621	0.3699		2.1963	0.3722	1.2305	4.2908	6.8817		0.4631		0.5822	4.1751	21.5565			2.4493	48.7438	3.6535	0.1367	1.7373	0.234	6.1307	3.1222	6.0375	26.0327	0.384	1.3384
ZMEL FISH 2	MSKC-00052	Post_Transplant	2	cells	zebrafish	ZMEL1_GFP	Zebrafish_Mel_Cell_Line	21_days_post_transplant	2.757	10	mole %		1.7461		0.8878	14.1907	4.5767	0.9701	3.359	20.7845	9.9402	1.1288	0.3497	1.1246	1.7815		1.7019	6.1835	8.0686		0.7423		0.5909	3.7838	18.0893			2.7314	43.5974	2.3135		1.4956	0.1931	5.0398	3.9238	6.2883	32.2617	0.4663	1.6893
ZMEL FISH 3	MSKC-00053	Post_Transplant	2	cells	zebrafish	ZMEL1_GFP	Zebrafish_Mel_Cell_Line	21_days_post_transplant	3.389	10	mole %		1.0969		0.9344	11.1215	3.7242	0.8102	2.8279	20.2321	7.1611	1.0358	0.3061	0.4201	1.5213	0.4111	1.3243	4.1205	9.0451		0.4239		0.5849	4.8116	28.0868			2.1938	43.221	3.4508	0.0938	1.8477	0.2212	8.1977	3.4076	7.6524	27.7647	0.5647	1.3847
[truncated: 238 more columns]
