# Supplementary material for: Adipocyte-Derived Lipids Mediate Melanoma Progression via FATP Proteins
Source: Oxford University Press journal article supplement (doi:10.1158/2159-8290.cd-17-1371), 2018-06-14
Supplement: 21598290cd171371-sup-193456_3_supp_4775122_p95d5q.xlsx [file 21598290cd171371-sup-193456_3_supp_4775122_p95d5q.xlsx]

## Sheet: HTSeq
Gene	Mono_A375_1	Mono_A375_2	Mono_A375_3	CC_A375_1	CC_A375_2	CC_A375_3
5S_rRNA	0	0	0	0	0	0
7SK	26.7452	4.01732	21.578	1.98991	7.80531	8.20594
A1BG	4.95281	8.03465	8.82735	3.97982	4.87832	6.15445
A1BG-AS1	62.4054	58.2512	74.5421	50.7427	51.7102	47.1841
A1CF	0	2.00866	0	0	0	0
A2M	3251.02	3220.89	3293.58	129.344	78.0531	87.1881
A2M-AS1	3.96225	4.01732	3.92327	6.96468	4.87832	3.07723
A2ML1	0	1.00433	1.96163	0	0	0
A2ML1-AS1	0	0	0	0	0	0
A2ML1-AS2	0	0	0	0	0	0
A2MP1	1.98112	0	0	0	0	0
A3GALT2	0	1.00433	0	0	0	0
A4GALT	145.613	162.702	173.605	122.379	120.007	132.321
A4GNT	0.990562	0	0	0	2.92699	1.02574
AA06	0	0	0	0	0	0
AAAS	825.138	845.646	759.152	905.409	841.997	805.208
AACS	1746.36	1901.2	1713.49	987.99	834.192	894.447
AACSP1	23.7735	29.1256	28.4437	63.6771	47.8075	55.3901
AADAC	0	0	0	0	0	0
AADACL2	0	0	0	0	0	0
AADACL2-AS1	0	0	0	0	0	0
AADACL3	0	0	0	0	0	0
AADACL4	0.990562	0	0	0	0	0
AADACP1	0.990562	1.00433	0.980817	0	0	0
AADAT	218.914	164.71	201.067	314.406	320.993	362.087
AAED1	281.319	310.338	310.919	345.249	360.995	362.087
AAGAB	1484.85	1433.18	1471.23	1654.61	1767.9	1768.38
AAK1	192.169	165.715	189.298	175.112	208.792	226.689
AAMDC	53.4903	44.1905	68.6572	41.7881	53.6615	55.3901
AAMP	1457.12	1452.26	1412.38	2107.31	2243.05	2182.78
AANAT	0.990562	3.01299	0.980817	2.98486	1.95133	3.07723
AAR2	1361.03	1291.57	1195.62	1242.7	1190.31	1286.28
AARD	76.2732	67.2902	75.5229	67.6569	45.8562	46.1584
AARS	16166	15312	15396.9	14758.2	15452.6	16495
AARS2	334.81	358.546	409.981	403.952	427.341	445.172
AARSD1	5.94337	9.03898	15.6931	27.8587	26.3429	16.4119
AARSP1	0	0	0	0	0	0
AASDH	386.319	388.676	459.022	428.825	407.827	359.01
AASDHPPT	1105.47	1003.33	948.45	1386.97	1396.17	1398.09
AASS	463.583	453.957	409.981	253.713	252.697	306.697
AATBC	5.94337	11.0476	9.80817	7.95964	6.82964	10.2574
AATK	165.424	139.602	144.18	42.783	33.1726	26.6693
AATK-AS1	0	0	0	0	0.975663	0
AB015752	0	0	0	0.994955	0.975663	0
AB019438	0.990562	3.01299	1.96163	2.98486	0.975663	2.05148
AB019440	0	0	0	0	0	0
AB019441	11.8867	13.0563	16.6739	11.9395	16.5863	12.3089
ABAT	81.2261	68.2945	71.5996	25.8688	19.5133	23.5921
ABC12-47043100G14	0	0	0	0	0	0
ABCA1	51.5092	44.1905	31.3861	189.041	170.741	244.127
ABCA10	1156.98	1037.47	1218.17	1782.96	1734.73	1938.65
ABCA11P	6.93393	8.03465	5.8849	14.9243	18.5376	13.3346
ABCA12	15.849	14.0606	4.90408	28.8537	44.8805	56.4158
ABCA13	42.5941	54.2339	28.4437	19.8991	15.6106	15.3861
ABCA17P	9.90562	15.065	4.90408	9.94955	12.6836	8.20594
ABCA2	1769.14	1697.32	1721.33	1119.32	1012.74	995.996
ABCA3	291.225	292.26	282.475	276.597	260.502	253.358
ABCA4	1.98112	0	0	0	0	4.10297
ABCA5	262.499	252.087	265.801	121.384	137.569	141.552
ABCA6	68.3488	64.2772	69.638	226.85	117.08	102.574
ABCA7	216.933	203.879	181.451	167.152	151.228	141.552
ABCA8	17.8301	18.078	26.4821	41.7881	28.2942	32.8237
ABCA9	0	1.00433	1.96163	8.95459	1.95133	4.10297
ABCA9-AS1	0	0	0	0	0	0
ABCB1	194.15	200.866	180.47	90.5409	94.6393	98.4712
ABCB10	808.298	824.555	786.615	803.923	833.216	827.774
ABCB10P3	0	0	0.980817	0	0	0
ABCB10P4	0	0	0	0.994955	0	0
ABCB11	0	0	0	0	0	0
ABCB4	458.63	466.009	389.384	54.7225	39.0265	43.0812
ABCB5	10.8962	4.01732	2.94245	0	0	0
ABCB6	36.6508	42.1819	37.271	25.8688	18.5376	22.5663
ABCB7	498.252	529.282	476.677	592.993	531.737	583.647
ABCB8	514.101	567.447	542.392	591.998	602.96	534.412
ABCB9	1413.53	1410.08	1368.24	1229.76	1129.82	1201.14
ABCC1	1254.05	1250.39	1380.99	1501.39	1475.2	1449.37
ABCC10	406.13	414.789	381.538	491.508	494.661	456.455
ABCC11	0	2.00866	2.94245	4.97477	1.95133	2.05148
ABCC12	0	0	0	0	0	0
ABCC13	0	0	0	0.994955	0	0
ABCC2	1526.46	1487.41	1392.76	865.61	802.971	859.572
ABCC3	2668.57	2595.19	2750.21	2808.76	2720.15	3005.42
ABCC4	561.648	522.252	578.682	986.995	1003.96	964.198
ABCC5	530.941	563.429	546.315	502.452	427.341	451.327
ABCC5-AS1	0	1.00433	0	0	0	0
ABCC6	4.95281	9.03898	5.8849	9.94955	4.87832	4.10297
ABCC6P1	0	0	0.980817	0	0	2.05148
ABCC6P2	0.990562	2.00866	0.980817	2.98486	0	1.02574
ABCC8	0	0	0	0	0	0
ABCC9	16.8395	23.0996	24.5204	22.884	29.2699	28.7208
ABCD1	608.205	587.533	586.528	366.143	324.896	338.495
ABCD1P2	0	0	0	0	0	1.02574
ABCD1P3	0	0	0	0	0	0
ABCD1P4	0	0	0	0	0	0
ABCD1P5	0	0	0	0	0	0
ABCD2	4.95281	4.01732	0.980817	0.994955	0	0
ABCD3	900.421	850.668	818.001	616.872	690.77	705.711
ABCD4	419.008	386.667	410.962	305.451	290.748	283.105
ABCE1	1450.18	1414.1	1436.9	2306.3	2504.53	2313.05
ABCF1	1697.82	1589.86	1647.77	1762.06	1940.59	2096.62
ABCF2	1365.98	1361.87	1348.62	1987.92	2039.14	2045.33
ABCF2P1	0	0	0.980817	0	0.975663	0
ABCF2P2	0	0	0	0	0	0
ABCF3	733.016	666.876	751.306	726.317	710.283	737.509
ABCG1	36.6508	17.0736	16.6739	73.6266	62.4425	111.806
ABCG2	17.8301	10.0433	28.4437	15.9193	23.4159	15.3861
ABCG4	9.90562	6.02598	2.94245	2.98486	2.92699	0
ABCG5	2.97168	2.00866	2.94245	1.98991	0.975663	2.05148
ABCG8	0	1.00433	0	0	0	0
ABHD1	19.8112	10.0433	6.86572	19.8991	15.6106	16.4119
ABHD10	988.58	996.296	994.548	952.171	1024.45	1082.16
ABHD11	240.706	215.931	215.78	339.279	380.509	419.529
ABHD11-AS1	36.6508	38.1646	40.2135	31.8385	29.2699	32.8237
ABHD12	1413.53	1327.73	1380.99	1033.76	1044.94	998.047
ABHD12B	2.97168	6.02598	4.90408	3.97982	8.78097	2.05148
ABHD13	937.071	860.711	1069.09	641.746	652.719	654.424
ABHD14A	151.556	116.502	108.871	81.5863	98.542	77.9564
ABHD14A-ACY1	4.95281	3.01299	3.92327	6.96468	9.75663	8.20594
ABHD14B	1710.7	1742.51	1610.5	2543.1	2471.36	2635.13
ABHD15	395.234	388.676	390.365	256.698	243.916	264.641
ABHD15-AS1	0	0	0	0	0	0
ABHD16A	35.6602	38.1646	35.3094	23.8789	34.1482	29.7465
ABHD16B	86.1789	91.3941	83.3694	127.354	151.228	178.479
ABHD17A	295.187	339.464	315.823	255.703	204.889	243.101
ABHD17AP1	0	0	0	0	0	0
ABHD17AP3	0.990562	0	0	0.994955	0.975663	0
ABHD17AP4	0	0	0	0	0	0
ABHD17AP6	0	0	0	0	0	0
ABHD17AP7	0	0	0	0	0	0
ABHD17AP8	0	0	0	0	0	0
ABHD17AP9	0	0	0	0	0	0
ABHD17B	429.904	411.776	377.614	337.29	281.967	309.774
ABHD17C	1547.26	1481.39	1501.63	506.432	501.491	449.275
ABHD18	184.244	176.762	166.739	159.193	171.717	188.737
ABHD2	1889.99	1806.79	1802.74	1378.01	1427.4	1588.87
ABHD3	169.386	179.775	177.528	38.8032	42.9292	37.9525
ABHD4	512.12	471.031	496.293	305.451	314.164	325.16
ABHD5	327.876	271.169	291.303	347.239	330.75	337.469
ABHD6	469.526	469.022	547.296	240.779	240.013	245.152
ABHD8	882.59	844.642	807.212	482.553	404.9	348.752
ABI1	664.667	738.183	677.744	785.019	761.017	770.332
ABI2	780.563	833.594	763.075	931.277	893.708	890.344
ABI3	2.97168	0	0	0.994955	0.975663	0
ABI3BP	10.8962	13.0563	9.80817	56.7124	39.0265	32.8237
ABL1	2085.13	2005.65	2113.66	2425.7	2375.74	2384.85
ABL2	3119.28	3300.23	3274.95	3721.13	3871.43	3988.09
ABLIM1	658.723	680.936	588.49	931.277	936.637	1087.29
ABLIM2	4.95281	8.03465	8.82735	15.9193	24.3916	24.6178
ABLIM3	783.534	810.495	796.423	1936.18	1832.3	1755.04
ABO	0	0	0	0	0	0
ABR	5225.21	5056.8	5223.83	3466.42	3419.7	3729.6
ABRA	0	0	0	0	0	0
ABRACL	721.129	792.417	695.399	415.891	414.657	397.988
ABT1	715.185	649.802	720.9	733.281	731.747	658.526
ABT1P1	0	0	0	0	0	0
ABTB1	752.827	722.114	729.728	498.472	385.387	422.606
ABTB2	790.468	795.43	805.251	542.25	505.394	504.665
AC000032	0	0	0	0	0	0
AC000036	0	0	0	0	0	0
AC000041	0	0	0	0	0	0
AC000067	0	0	0	0	0	0
AC000068	10.8962	16.0693	14.7123	24.8739	5.85398	15.3861
AC000077	0	0	0	0	0	0
AC000078	2.97168	1.00433	1.96163	0.994955	2.92699	0
AC000081	0	0	0	0	0	0
AC000089	3.96225	2.00866	2.94245	1.98991	3.90265	1.02574
AC000095	0	0	0	0	0	0
AC000099	0	0	0	0	0	0
AC000111	0	0	0	0.994955	0	0
AC000120	0	1.00433	2.94245	0	0.975663	2.05148
AC000123	4.95281	7.03031	10.789	6.96468	6.82964	8.20594
AC000124	0	0	0	0	0	0
AC000362	0	0	0	0	0	0
AC000367	0	0	0	0	0	0
AC000370	0	0	0	0	0	0
AC000374	0	0	0	0	0	0
AC002044	0.990562	0	0	0	1.95133	1.02574
AC002056	0	0	2.94245	0.994955	0	1.02574
AC002059	0	0	0	0.994955	0	0
AC002064	1.98112	1.00433	1.96163	1.98991	1.95133	1.02574
AC002066	0.990562	1.00433	0	5.96973	5.85398	6.15445
AC002069	0	0	0.980817	0.994955	0.975663	0
AC002075	3.96225	1.00433	3.92327	3.97982	1.95133	7.1802
AC002076	3.96225	1.00433	0.980817	1.98991	2.92699	2.05148
AC002115	0	0	0	0	0	0
AC002116	5.94337	4.01732	2.94245	7.95964	7.80531	20.5148
AC002117	1.98112	0	1.96163	2.98486	3.90265	3.07723
AC002127	0	0	0	0	0	0
AC002128	0.990562	1.00433	0	0	0	0
AC002306	0	0	0	0	0	0
AC002310	2.97168	8.03465	11.7698	25.8688	14.6349	8.20594
AC002314	0	0	0.980817	0	0	0
AC002331	0	0	0	0	0	0
AC002366	0	0	0	0	0	0
AC002368	0	0	0	0	0	0
AC002383	0	1.00433	0	1.98991	1.95133	1.02574
AC002386	0	0	0	0	0	0
AC002398	23.7735	24.1039	22.5588	24.8739	18.5376	18.4634
AC002400	0	0	0	0	0	0
AC002401	0	0	0	0	0	0
AC002429	0	0	0	0	0.975663	0
AC002451	1.98112	1.00433	0.980817	0.994955	0.975663	2.05148
AC002454	5.94337	6.02598	4.90408	8.95459	4.87832	8.20594
AC002456	8.91505	8.03465	14.7123	12.9344	8.78097	12.3089
AC002463	0	0	0	0	0	0
AC002465	0	0	0	0	0	0
AC002467	38.6319	49.2122	48.06	65.667	41.9535	43.0812
AC002472	0.990562	1.00433	0	0	0	0
AC002480	1.98112	2.00866	0	17.9092	12.6836	15.3861
AC002486	0	0	0.980817	0	0	0
AC002511	0	0	0	0	0	0
AC002519	0.990562	2.00866	0	0.994955	0	0
AC002523	0	0	0	0	0	0
AC002539	0	0	0	0	0	0
AC002542	0	0	0	0	0	0
AC002543	0	0	0	0	0	0
AC002550	0	0	0	0	0	0
AC002551	0	0	0	0	0	0
AC002553	0	0	0	0	0	0
AC002984	0	0	0.980817	0	0	0
AC002985	0	0	0	0	0	0
AC003002	0.990562	2.00866	0.980817	1.98991	1.95133	3.07723
AC003003	0	0	0	0	0	0
AC003005	0	0	0	0	0	0
AC003006	0	0	0	0	0	0
AC003009	1.98112	0	0	0	0	0
AC003045	0	0	0	0	0	0
AC003075	8.91505	6.02598	11.7698	18.9041	7.80531	13.3346
AC003080	1.98112	0	0.980817	0.994955	1.95133	0
AC003084	0	0	0	0	0	0
AC003088	0.990562	1.00433	0.980817	0	1.95133	4.10297
AC003090	1.98112	2.00866	1.96163	0.994955	1.95133	2.05148
AC003092	1.98112	3.01299	3.92327	3.97982	1.95133	4.10297
AC003104	0	2.00866	0.980817	0	0	0
AC003664	0.990562	0	0	0	0	1.02574
AC003682	0.990562	1.00433	0.980817	1.98991	0.975663	5.12871
AC003956	1.98112	1.00433	0.980817	1.98991	0.975663	1.02574
AC003958	0.990562	1.00433	0	0	0	0
AC003973	0	0	0	0	0	0
AC003984	0	0	0	0	0	0
AC003985	0	0	0	0	0	0
AC003986	3.96225	1.00433	1.96163	3.97982	3.90265	2.05148
AC003988	0	0	0	0	0	0
AC003989	0	0	0	0.994955	0	0
AC003991	0	0	0	0	0.975663	0
AC004004	0	0	0	0	0	0
AC004006	0	0	0	0	0	0
AC004009	0	0	0	0	0	0
AC004012	3.96225	1.00433	0	0.994955	0.975663	1.02574
AC004014	0	0	0	0	0	0
AC004019	1.98112	2.00866	1.96163	0.994955	0.975663	1.02574
AC004022	0	0	0	0	0	0
AC004051	0	0	0	0	0	0
AC004053	0	0	0	0.994955	0.975663	0
AC004054	0	0	0	0	0	0
AC004057	0	0	0	0	0	0
AC004062	0	0	0	0	0	0
AC004063	0	0	0	0	0	0
AC004066	0	0	0	0	0	0
AC004067	0	0	1.96163	1.98991	0	0
AC004069	5.94337	7.03031	2.94245	3.97982	4.87832	2.05148
AC004070	0	0	0	0	0	0
AC004074	0	0	0	0	0	0
AC004076	0	2.00866	0.980817	0.994955	1.95133	1.02574
AC004112	0.990562	4.01732	0.980817	0	2.92699	1.02574
AC004125	0	0	0	0	0	0
AC004129	0.990562	0	0.980817	0	0.975663	0
AC004156	0.990562	6.02598	3.92327	4.97477	6.82964	5.12871
AC004158	0	0	0	0	0	0
AC004160	0	0	0	0	0	0
AC004221	5.94337	2.00866	2.94245	4.97477	0.975663	5.12871
AC004231	0	0	0	0	0	0
AC004237	0	2.00866	0	0	0	0
AC004257	0	0	0	0	0	0
AC004381	90.1411	95.4114	91.216	153.223	180.498	182.582
AC004383	0	0	0	0	1.95133	0
AC004386	0.990562	0	0.980817	2.98486	1.95133	1.02574
AC004448	0	0	0	0	0	0
AC004449	0	2.00866	1.96163	0.994955	2.92699	4.10297
AC004453	85.1883	64.2772	79.4462	92.5308	91.7124	90.2653
AC004461	0	1.00433	0.980817	0	0	0
AC004471	2.97168	1.00433	3.92327	1.98991	1.95133	3.07723
AC004485	0	0	0	0	0	0
AC004490	0	0	0.980817	0	0	0
AC004510	1.98112	0	3.92327	0.994955	1.95133	3.07723
AC004535	0	0	0	0	0	0
AC004538	0	0	1.96163	0	2.92699	0
AC004540	17.8301	24.1039	22.5588	18.9041	17.5619	16.4119
AC004543	0	0	0	0	0	0
AC004549	0	1.00433	0	0	0	1.02574
AC004593	2.97168	5.02165	0	0	0	1.02574
AC004603	0	0	0	0	0	0
AC004623	0	0	0	0	0	0
AC004637	22.7829	11.0476	19.6163	0	0	1.02574
AC004691	0	0	0	0.994955	0	0
AC004692	0.990562	2.00866	1.96163	0	0.975663	0
AC004702	0	0	0	0	0	0
AC004744	0	0	0	0	0	0
AC004754	0	0	0	0	0	0
AC004775	0	0	0	0	0	0
AC004791	0.990562	0	0	0	0	1.02574
AC004837	0	0	0	1.98991	2.92699	2.05148
AC004840	0	0	0	0	0.975663	0
AC004854	1.98112	2.00866	1.96163	0.994955	2.92699	1.02574
AC004862	0	0	0	0	0	0
AC004866	0	0	0	0	0	0
AC004869	0	0	0	0	0	0
AC004870	0	2.00866	0	1.98991	0	0
AC004893	59.4337	57.2468	44.1368	51.7376	51.7102	53.3386
AC004895	0	2.00866	0	0	4.87832	2.05148
AC004899	0	0	0	0	0	0
AC004901	0	0	0	0	0	0
AC004906	0.990562	0	0	0	0	0
AC004911	0	0	0	0	0	0
AC004920	0	0	0	0.994955	0.975663	0
AC004938	0	0	0	0	0	0
AC004941	0	0	0	0	0	0
AC004945	0.990562	0	0	0	0	1.02574
AC004947	0	0	0	0	0	0
AC004951	6.93393	4.01732	0.980817	0.994955	7.80531	3.07723
AC004967	474.479	423.828	455.099	553.195	587.349	621.6
AC004980	92.1222	117.507	93.1776	111.435	102.445	115.909
AC004985	0	0	0.980817	0	0	0
AC004987	0	2.00866	0.980817	0	0.975663	0
AC004988	0.990562	1.00433	1.96163	0	0	0
AC005008	0	0	0	0	0	0
AC005009	0.990562	2.00866	1.96163	0	0	1.02574
AC005013	0.990562	0	0	0	0	0
AC005014	0	3.01299	0.980817	0	0.975663	0
AC005017	0.990562	0	0.980817	0	0	0
AC005019	2.97168	1.00433	1.96163	1.98991	0.975663	2.05148
AC005033	0	0	0	0	0	0
AC005034	0	0	0	0	0	0
AC005037	0.990562	2.00866	1.96163	0.994955	1.95133	2.05148
AC005040	0	0	0	0	0	0
AC005041	0	0	0	0	0	0
AC005042	4.95281	0	0	0	0.975663	9.23168
AC005062	0	0	0	0	0	0
AC005076	17.8301	17.0736	8.82735	17.9092	22.4403	31.798
AC005077	8.91505	7.03031	4.90408	7.95964	7.80531	12.3089
AC005082	0	0	0	0	0	0
AC005083	0.990562	2.00866	0	0.994955	1.95133	1.02574
AC005094	0	0	0	0	0	0
AC005102	0	0	0	0	0	0
AC005104	0.990562	4.01732	4.90408	0	0.975663	0
AC005105	0	0	0	0	0	0
AC005150	0	0	0	0	0.975663	0
AC005152	0.990562	3.01299	3.92327	2.98486	7.80531	1.02574
AC005154	360.564	410.771	362.902	214.91	181.473	195.917
AC005160	0	0	0	0	0	0
AC005162	0	0	0	0	0	0
AC005176	0	0	0	0	0	0
AC005178	0	0	0	0	0	0
AC005189	0	0	0	0	0	0
AC005197	0	0	0	0.994955	1.95133	2.05148
AC005220	0.990562	1.00433	0.980817	0	0	0
AC005224	11.8867	4.01732	8.82735	7.95964	11.708	13.3346
AC005229	1.98112	0	0.980817	2.98486	0	0
AC005235	0	0	0	0	0	0
AC005237	0	0	0	0.994955	0.975663	0
AC005251	0.990562	1.00433	3.92327	3.97982	5.85398	4.10297
AC005253	32.6885	35.1516	42.1751	40.7931	50.7345	29.7465
AC005255	0	1.00433	1.96163	0.994955	4.87832	4.10297
AC005256	12.8773	8.03465	34.3286	22.884	14.6349	24.6178
AC005262	0.990562	1.00433	0.980817	0.994955	1.95133	0
AC005264	2.97168	3.01299	4.90408	1.98991	3.90265	2.05148
AC005276	0	0	0	0	0	0
AC005281	0	0	0	0	0	4.10297
AC005300	0	1.00433	0	2.98486	0	0
AC005301	0	0	0	0	0	0
AC005304	0	0	0	0	0	0
AC005306	1.98112	6.02598	7.84653	2.98486	3.90265	4.10297
AC005307	0.990562	2.00866	0	0.994955	0	0
AC005324	0	0	0	0	0	0
AC005329	3.96225	8.03465	2.94245	0	0.975663	2.05148
AC005330	1.98112	2.00866	1.96163	13.9294	9.75663	19.4891
AC005336	0	1.00433	0	2.98486	4.87832	3.07723
AC005339	0	0	0	0	0	0
AC005351	0	0	0	0.994955	0	1.02574
AC005355	76.2732	95.4114	108.871	160.188	152.203	148.733
AC005357	0	0	0	0	0	0
AC005358	0	0	0	0	0.975663	0
AC005363	0	0	0	0	0	0
AC005387	7.92449	4.01732	6.86572	6.96468	4.87832	5.12871
AC005391	0	0	0	0	0	0
AC005392	0	0	0	0	0	0
AC005394	0	0	0	0	0	0
AC005481	0	0	0	0	0	0
AC005487	0	0	0	0	0	0
AC005488	0	0	0	0	0	0
AC005498	6.93393	5.02165	8.82735	4.97477	10.7323	5.12871
AC005517	0.990562	2.00866	1.96163	3.97982	5.85398	1.02574
AC005518	0	0	0	0	0	0
AC005519	0.990562	3.01299	1.96163	3.97982	1.95133	3.07723
AC005522	0	0	0	0	0	0
AC005523	8.91505	9.03898	18.6355	14.9243	25.3672	12.3089
AC005532	5.94337	9.03898	5.8849	4.97477	7.80531	11.2832
AC005534	6.93393	4.01732	3.92327	3.97982	5.85398	6.15445
AC005537	9.90562	2.00866	3.92327	8.95459	5.85398	6.15445
AC005538	0	0	0	0	0	0
AC005539	0	0	0	0	0	0
AC005540	0.990562	5.02165	1.96163	1.98991	7.80531	5.12871
AC005546	0.990562	0	1.96163	0	0.975663	0
AC005550	19.8112	16.0693	12.7506	19.8991	9.75663	11.2832
AC005559	0	0	0	0	0	0
AC005562	22.7829	14.0606	11.7698	12.9344	13.6593	20.5148
AC005588	0	0	0	0	0	0
AC005592	50.5186	36.1559	44.1368	47.7578	52.6858	49.2356
AC005597	0	0	0	0	0	0
AC005606	0	0	0	0	0	0
AC005609	0	0	0	0	0	0
AC005614	0	1.00433	0	0.994955	0	0
AC005616	0	0	0	0	0	0
AC005618	69.3393	48.2079	52.9641	31.8385	34.1482	25.6436
AC005624	1.98112	1.00433	0.980817	0.994955	1.95133	2.05148
AC005625	0	2.00866	0	0	0.975663	0
AC005626	0	0	0	0	0	0
AC005682	1.98112	1.00433	0.980817	0	0	2.05148
AC005703	0	1.00433	0	0	0	0
AC005722	0	0	0.980817	0	0	0
AC005730	0	0	0	0	0	0
AC005740	3.96225	9.03898	8.82735	5.96973	6.82964	2.05148
AC005741	0	0	0	0	0	0
AC005754	2.97168	6.02598	5.8849	0.994955	3.90265	1.02574
AC005757	0	0	0	0	0	0
AC005758	0	0	0	0	0	0
AC005772	0	0	0	0	0	0
AC005775	4.95281	4.01732	0.980817	0.994955	0.975663	2.05148
AC005776	0	0	0.980817	0	0	0
AC005777	0	0	0	0	0	0
AC005779	0	0	0	0	0	0
AC005780	0	0	0	0	0	0
AC005785	3.96225	13.0563	7.84653	7.95964	5.85398	8.20594
AC005786	0.990562	2.00866	1.96163	1.98991	0	0
AC005789	0	0	0	0	0	0
AC005794	0	0	0	0	0	0
AC005795	2.97168	7.03031	1.96163	0.994955	7.80531	5.12871
AC005808	0	0	0	0	0	0
AC005822	0.990562	0	0.980817	1.98991	0	0
AC005838	0	0	0	0	0	0
AC005863	0	0	0	0	0	0
AC005932	9.90562	3.01299	6.86572	7.95964	12.6836	2.05148
AC005943	0	0	0	0	0	0
AC005944	0	0	0	0	0	0
AC005954	0.990562	0	0	0.994955	0	0
AC006000	0	0	0	0	0	2.05148
AC006003	0	0	0	0	0	0
AC006004	0	0	0	0.994955	0	0
AC006007	0	0	0	0	0	0
AC006011	0	0	0	0	0	0
AC006014	0	0	0	0	0	0
AC006019	0	0	0	0	0	1.02574
AC006022	0	0	0	0	0	0
AC006026	0	2.00866	0.980817	0	0.975663	6.15445
AC006028	0.990562	0	1.96163	0	0	0
AC006033	0	0	0	0	0	1.02574
AC006037	0	0	0	0	0	0
AC006041	0	0	0	0	0	0
AC006042	4.95281	4.01732	1.96163	2.98486	2.92699	6.15445
AC006050	0	0	0	0	0	0
AC006070	0	0	0	0	0	0
AC006076	0	0	0	0	0	0
AC006077	0	0	0	0	0	0
AC006115	0	0	0	0	0	0
AC006116	5.94337	5.02165	6.86572	5.96973	8.78097	4.10297
AC006126	0	0	1.96163	0	0	0
AC006129	0.990562	0	1.96163	1.98991	0.975663	3.07723
AC006130	0	1.00433	0	0	0	0
AC006133	0	0	0	0	0	0
AC006145	0	0	0	0	0	0
AC006150	0	0	0	0	0	0
AC006153	0	0	0	0	0	0
AC006159	0	1.00433	0	0	0	0
AC006160	2.97168	1.00433	2.94245	8.95459	0.975663	1.02574
AC006195	0	0	0	0.994955	0	0
AC006196	0	0	0	0	0	0
AC006227	0	0	0	0	0	0
AC006262	257.546	257.109	253.051	76.6115	123.909	129.244
AC006272	0	0	0	0	0	0
AC006273	23.7735	29.1256	18.6355	45.7679	28.2942	43.0812
AC006277	0	0	0	0	0	0
AC006296	0	0	0	0	0	0
AC006326	0	0	0	0	0	0
AC006328	0	0	0	0	0	0
AC006335	0	0	0	0	0	0
AC006355	0	0	0	0	0	0
AC006366	0	0	0	0	0	0
AC006369	0	1.00433	0.980817	1.98991	0	0
AC006372	3.96225	0	1.96163	0.994955	0	0
AC006373	0	0	0.980817	0	0	0
AC006378	1.98112	2.00866	1.96163	1.98991	0.975663	3.07723
AC006380	0	0	0	0	0	0
AC006390	0	0	0	0	0	0
AC006427	0	0	0	0	0	0
AC006445	2.97168	3.01299	6.86572	3.97982	3.90265	5.12871
AC006458	0	0	0	0	0	0
AC006460	0	0	0	0.994955	0.975663	0
AC006461	0	0	0	0	0	0
AC006466	0	0	0	0	0	0
AC006482	0	0	0	0	0	0
AC006483	0	0	2.94245	2.98486	0.975663	2.05148
AC006486	0	0	0	0	0	0
AC006499	0	0	0	0	0	0
AC006509	0	0	2.94245	0.994955	0.975663	2.05148
AC006538	19.8112	19.0823	24.5204	21.889	22.4403	17.4376
AC006539	0	1.00433	0	1.98991	0	2.05148
AC006547	12.8773	22.0953	17.6547	12.9344	7.80531	23.5921
AC006548	0	0	0	0	0	0
AC006552	0	0	0	0	0	0
AC006942	0.990562	6.02598	0.980817	1.98991	9.75663	7.1802
AC006946	21.7924	14.0606	18.6355	26.8638	34.1482	20.5148
AC006947	0	0	0	0	0	0
AC006960	0	0	0	0	0	0
AC006978	13.8679	11.0476	14.7123	15.9193	11.708	15.3861
AC006987	0.990562	0	0	0	0	0
AC006989	0	0	0.980817	0	0	0
AC006994	0	0	0	0.994955	0	0
AC007000	0	1.00433	0	0	0	0
AC007003	0	0	0	0	0	0
AC007009	0	0	0	0	0	0
AC007016	0	0	0.980817	0	1.95133	1.02574
AC007036	0	0	0	0	0	0
AC007038	5.94337	5.02165	3.92327	4.97477	2.92699	0
AC007040	30.7074	26.1126	29.4245	27.8587	32.1969	36.9267
AC007041	1.98112	4.01732	1.96163	1.98991	1.95133	0
AC007050	0	0	0	0	0	0
AC007064	0	0	0	0	0	0
AC007078	0	0	0	0	0	0
AC007091	0	0	0	0.994955	0	1.02574
AC007098	0	0	0	0	0	0
AC007099	0	0	0	0	0	0
AC007106	0	0	0	0.994955	0	1.02574
AC007115	0	0	0	0	0	0
AC007126	0	2.00866	0	0	0	0
AC007128	1.98112	6.02598	7.84653	12.9344	12.6836	7.1802
AC007131	2.97168	7.03031	1.96163	6.96468	4.87832	2.05148
AC007136	0	0	0	0	0	0
AC007161	0	1.00433	0	0	0	1.02574
AC007163	0	1.00433	0	1.98991	0	0
AC007179	0	0	0	0	0	0
AC007182	0	0	0	0	0	0
AC007192	0	0	0	0	0	0
AC007193	2.97168	4.01732	4.90408	0.994955	0.975663	2.05148
AC007204	0	0	0	0	0	1.02574
AC007228	7.92449	5.02165	4.90408	8.95459	5.85398	9.23168
AC007229	0	0	2.94245	0.994955	2.92699	2.05148
AC007237	0	0	0	0	0	0
AC007238	12.8773	19.0823	11.7698	12.9344	7.80531	17.4376
AC007246	135.707	129.559	151.046	211.925	255.624	245.152
AC007249	0	0	0	0	0	0
AC007250	0	0	0	0	0	0
AC007253	0	0	0	0	0	0
AC007255	2.97168	2.00866	0.980817	2.98486	0.975663	3.07723
AC007256	3.96225	2.00866	2.94245	0.994955	0.975663	5.12871
AC007271	0	0	0	0	0	0
AC007272	0	0	0	0	0	0
AC007274	0	0	0	0	0	0
AC007277	0	1.00433	0.980817	0.994955	0	1.02574
AC007278	0	0	0	0	0	0
AC007279	0	0	0	0.994955	0	1.02574
AC007283	0	0	0	0.994955	0	0
AC007285	13.8679	22.0953	21.578	15.9193	14.6349	13.3346
AC007292	7.92449	10.0433	16.6739	16.9142	7.80531	5.12871
AC007308	0	0	0	0	0	0
AC007312	0	0	0	0	0	0
AC007317	0	0	0	0	0	0
AC007318	59.4337	50.2165	48.06	75.6165	69.2721	62.5703
AC007319	0	1.00433	0.980817	0.994955	1.95133	1.02574
AC007322	0	0	0	0	0	0
AC007326	0	0	0	0	0	0
AC007327	0	0	0	0	0	0
AC007349	0	0	0	0	0	0
AC007359	0	0	0	0	0	0
AC007362	0	0	0	0	0.975663	0
AC007364	0	0	0	0	0	0
AC007365	4.95281	2.00866	1.96163	0	0.975663	1.02574
AC007381	0	0	0	0	0	0
AC007383	57.4526	72.3118	50.0217	63.6771	57.5641	59.493
AC007386	0	0	0	0	0	0
AC007387	0	0	0	0	0	0
AC007389	0	0	0	1.98991	0.975663	0
AC007390	0	0	0	0	0	0
AC007391	0.990562	1.00433	0	0.994955	0	1.02574
AC007392	0.990562	0	1.96163	0	0	0
AC007394	0	0	0	0	0	0
AC007395	0	0	0.980817	0	0	0
AC007403	0	0	0	0	0	1.02574
AC007405	76.2732	72.3118	80.427	59.6973	81.9557	91.2911
AC007422	0	0	0	0	0	0
AC007461	0	0	0	0	0	0
AC007463	0	0	0	0	0	0
AC007551	0.990562	0	0.980817	0	1.95133	0
AC007556	0	0	0	0	0	0
AC007557	0	0	0	0	0	0
AC007559	0	0	0	0	0	0
AC007560	0	0	0.980817	0	0	0
AC007562	0	0	0	0	0	0
AC007563	0	0	0	1.98991	0	1.02574
AC007566	5.94337	1.00433	4.90408	0.994955	4.87832	1.02574
AC007568	0	0	0	0	0	0
AC007618	0	0	0	0	0	0
AC007620	43.5847	58.2512	50.0217	49.7477	82.9314	48.2099
AC007631	0	0	0	0	0	0
AC007652	0	0	0	0	0	0
AC007677	0	0	0	0	0	0
AC007679	0	0	0	0	0	0
AC007682	0	0	0	0	0	0
AC007731	0.990562	0	0	0	0	1.02574
AC007740	0	0	0	0	0	0
AC007742	0	0	0	0	0	0
AC007743	0.990562	1.00433	4.90408	1.98991	1.95133	0
AC007750	0	0	0	0	0	0
AC007773	35.6602	24.1039	19.6163	50.7427	62.4425	53.3386
AC007787	0	0	0	0	0	0
AC007790	6.93393	1.00433	8.82735	9.94955	10.7323	3.07723
AC007795	0	0	0	0	0	0
AC007796	0	0	0	0	0	0
AC007875	0	0	0	0	0	0
AC007879	9.90562	13.0563	6.86572	9.94955	20.4889	12.3089
AC007880	0	0	0	1.98991	0	2.05148
AC007881	0	0	0	0	0	0
AC007899	0.990562	0	0	0	0	0
AC007919	0	0	0	0	0	0
AC007948	0.990562	0	0	0	0	0
AC007950	0	0	0	0	0	0
AC007952	0	0	0	0.994955	0.975663	0
AC007966	5.94337	4.01732	5.8849	0.994955	0.975663	1.02574
AC007967	0	0	0	0	0	0
AC007969	11.8867	13.0563	11.7698	12.9344	10.7323	12.3089
AC008060	2.97168	0	1.96163	0	0.975663	0
AC008063	2.97168	2.00866	4.90408	0.994955	0.975663	0
AC008065	0	1.00433	0	0	0.975663	0
AC008067	0	0	0	0	0	0
AC008069	0	0	0	0	0.975663	0
AC008072	0	0	0	0	0	0
AC008073	0	1.00433	0	0.994955	0.975663	0
AC008074	0	1.00433	0	0.994955	0	4.10297
AC008079	0	0	0	0	0	0
AC008088	0	3.01299	0	0.994955	0.975663	0
AC008132	5.94337	4.01732	4.90408	5.96973	5.85398	5.12871
AC008154	0	0	0	0	0	0
AC008155	1.98112	0	0.980817	1.98991	0.975663	4.10297
AC008171	0	0	0	0	0	0
AC008173	0	0	0	0	0	0
AC008175	0	0	0	0	0	0
AC008264	0	0	0	0	0	0
AC008265	0	0	0	0	0	1.02574
AC008268	0.990562	0	0.980817	0	0	0
AC008269	0	0	0.980817	0	0	0
AC008271	0	0	0	0	0	0
AC008277	0	0	0	0	0	0
AC008278	0	0	0.980817	0	0	0
AC008280	0	1.00433	0.980817	0.994955	0.975663	0
AC008281	0	0	0	0	0	0
AC008427	0	0	0	0.994955	1.95133	1.02574
AC008440	43.5847	29.1256	33.3478	19.8991	15.6106	21.5406
AC008565	0	0	0	0	0	0
AC008592	14.8584	15.065	15.6931	12.9344	8.78097	13.3346
AC008691	0	0	0	0	0	0
AC008694	0	0	0.980817	0.994955	0.975663	0
AC008697	0	0	0	0	0	0
AC008703	0	0	0	0	0	0
AC008746	4.95281	3.01299	2.94245	1.98991	3.90265	1.02574
AC008753	3.96225	4.01732	5.8849	4.97477	0.975663	5.12871
AC008781	0	0	0.980817	0	0	2.05148
AC008834	0	0	0	0	0	0
AC008850	0.990562	0	0.980817	0	0	0
AC008937	2.97168	0	0.980817	2.98486	0.975663	3.07723
AC008940	0	0	0	0	0	0
AC008982	2.97168	5.02165	3.92327	4.97477	4.87832	6.15445
AC008984	0	0	0	0	0	0
AC008991	0	0	0	0	0	0
AC008992	0	0	0	0	0	0
AC009005	53.4903	55.2382	45.1176	39.7982	43.9048	36.9267
AC009014	0	0	0	0	0	0
AC009052	0	0	0	0	0	0
AC009095	0.990562	0	0.980817	0	0	0
AC009110	0	0	0	0	0	0
AC009120	16.8395	16.0693	24.5204	19.8991	14.6349	8.20594
AC009133	20.8018	25.1083	14.7123	17.9092	3.90265	13.3346
AC009134	0	0	0	0	0	0
AC009158	0	0	0	0	0	0
AC009161	0	0	0	0	0	0
AC009166	0.990562	4.01732	5.8849	0	0.975663	1.02574
AC009227	0	0	0	0	0	0
AC009228	0.990562	2.00866	0	0.994955	0	0
AC009229	10.8962	17.0736	13.7314	1.98991	0.975663	0
AC009236	0	0	0	0	0	0
AC009237	142.641	148.641	161.835	105.465	112.201	101.548
AC009238	0	0	0	0	0	0
AC009245	9.90562	10.0433	16.6739	16.9142	6.82964	14.3604
AC009262	0	1.00433	0	0.994955	0	0
AC009263	0	0	0	0.994955	0	0
AC009264	2.97168	7.03031	3.92327	2.98486	2.92699	3.07723
AC009274	1.98112	0	0.980817	0	0.975663	0
AC009276	0	0	0	0	0	0
AC009299	0.990562	1.00433	0.980817	0.994955	0	0
AC009302	0.990562	3.01299	0	0	0.975663	1.02574
AC009303	0	0	0	0	0	0
AC009305	0	0	0	0	0	0
AC009310	0	0	0	0	0	0
AC009312	0	0	0	0	0	0
AC009313	0	0	0	0	0	0
AC009362	1.98112	1.00433	0.980817	0.994955	0.975663	0
AC009365	0	0	0	0	0	0
AC009403	61.4148	62.2685	54.9257	84.5711	121.958	109.754
AC009404	16.8395	19.0823	17.6547	13.9294	6.82964	8.20594
AC009410	17.8301	21.0909	24.5204	33.8285	19.5133	35.901
AC009411	0	0	0	0	0	0
AC009413	1.98112	2.00866	0	0	0.975663	0
AC009414	0	0	0	0.994955	0.975663	0
AC009473	0	0	0	0	0	0
AC009474	0.990562	0	1.96163	0	0	0
AC009477	1.98112	0	0.980817	0	0	0
AC009478	0	0	0.980817	0	0	0
AC009480	0	1.00433	0	0	0	0
AC009487	10.8962	6.02598	9.80817	11.9395	10.7323	11.2832
AC009494	0	0	0	0	0	0
AC009495	0	5.02165	0.980817	0	0	0
AC009498	0	0	0	0	0	0
AC009500	0	0	0	0	0	0
AC009501	10.8962	6.02598	12.7506	2.98486	9.75663	7.1802
AC009502	18.8207	23.0996	13.7314	5.96973	4.87832	7.1802
AC009505	0	0	0	0	0	0
AC009506	11.8867	29.1256	20.5972	17.9092	16.5863	19.4891
AC009508	0	0	0	0	0	0
AC009517	0	0	0	0	0	0
AC009518	2.97168	3.01299	8.82735	5.96973	4.87832	9.23168
AC009531	0	0	0.980817	0	0	0
AC009541	0	0	0	0	0	0
AC009542	0	0	0	0	0	0
AC009784	17.8301	24.1039	24.5204	2.98486	5.85398	10.2574
AC009878	0	0	0	0	0	0
AC009892	0	0	0	0	0	0
AC009945	0	0	0	0	0	0
AC009947	0	0	0	0	0	0
AC009948	96.0845	114.494	122.602	123.374	108.299	131.295
AC009950	0.990562	1.00433	2.94245	0.994955	0	2.05148
AC009955	0	0	0	0	0	0
AC009961	21.7924	15.065	16.6739	19.8991	16.5863	13.3346
AC009963	0	0	0	0.994955	0.975663	1.02574
AC009965	0	0	0	0	0	0
AC009967	0	0	0	0	0	0
AC009969	0	0	0	0	0	0
AC009970	0	0	0	0	0	0
AC010082	0	0	0	0	0	0
AC010084	0	1.00433	0	0	0	0
AC010086	0	0	0	0	0	0
AC010091	0	1.00433	0	0	0	0
AC010095	0	0	0.980817	0	0	0
AC010096	0	0	0	0	0	0
AC010105	0	0	0	0	0	0
AC010127	0	1.00433	0	0	0	0
AC010132	0.990562	0	0	0	0	0
AC010136	0	0	0	0	0	0
AC010141	0	0	0	0	0	0
AC010145	0	0	0	0	0	0
AC010148	0	0	0	0.994955	0	0
AC010149	0	1.00433	0	0	0	0
AC010150	0	0	0.980817	0	0	0
AC010153	0	0	0	0	0	0
AC010154	0	0	0	0	0	0
AC010226	3.96225	6.02598	5.8849	2.98486	5.85398	10.2574
AC010240	5.94337	9.03898	6.86572	11.9395	7.80531	6.15445
AC010468	2.97168	4.01732	10.789	5.96973	2.92699	3.07723
AC010492	2.97168	2.00866	2.94245	0.994955	0.975663	5.12871
AC010504	1.98112	2.00866	8.82735	4.97477	6.82964	2.05148
AC010518	0	0	0	0	0	0
AC010522	0.990562	1.00433	0	0	2.92699	1.02574
AC010524	12.8773	10.0433	6.86572	12.9344	12.6836	13.3346
AC010525	0	1.00433	0	0.994955	1.95133	0
AC010547	0	0	0	0	0	0
AC010641	0	0	0	0	0	0
AC010642	8.91505	9.03898	5.8849	7.95964	9.75663	4.10297
AC010646	0	0	0	0	0	0
AC010649	0	0	0	0	0	0
AC010677	0	1.00433	0.980817	0	0	2.05148
AC010723	0	0	0	0	0	0
AC010729	5.94337	9.03898	5.8849	5.96973	3.90265	6.15445
AC010731	1.98112	1.00433	0.980817	0.994955	0	1.02574
AC010733	1.98112	1.00433	1.96163	3.97982	1.95133	2.05148
AC010740	0	0	0	0	0	0
AC010744	0	0	0	0	0	0
AC010745	0	0	0	0	0	0
AC010746	0	0	0	0	0	0
AC010761	28.7263	35.1516	40.2135	35.8184	48.7832	26.6693
AC010878	2.97168	0	0	0.994955	0.975663	2.05148
AC010880	0	0	0	0	0	0
AC010883	13.8679	13.0563	5.8849	7.95964	9.75663	5.12871
AC010884	0	0	0.980817	0	0	0
AC010886	0	0	0	0	0	0
AC010890	0.990562	1.00433	0	0.994955	0.975663	0
AC010891	0	0	0	0	0	0
AC010894	7.92449	9.03898	5.8849	18.9041	18.5376	22.5663
AC010900	2.97168	3.01299	6.86572	1.98991	4.87832	5.12871
AC010904	0	1.00433	0	0	0	0
AC010907	0	0	0	0	0	0
AC010967	0	0	5.8849	0	0	0
AC010969	0	0	0	0	0	0
AC010970	0	0	0	0	0	0
AC010971	0	0	0	0	0	0
AC010974	0	1.00433	0	0	0	0
AC010975	0	0	0	0	0	0
AC010976	1.98112	3.01299	2.94245	2.98486	2.92699	0
AC010980	4.95281	7.03031	7.84653	9.94955	9.75663	6.15445
AC010982	0	0	0	0	0	0
AC010983	0	0	0	0	0	0
AC010987	4.95281	9.03898	8.82735	9.94955	2.92699	5.12871
AC011193	0	0	0	0	0	0
AC011196	0	0	0	0	0	0
AC011225	0	0	0	0	0	0
AC011233	0	0	0	0	0	0
AC011239	0	0	0	0	0	0
AC011242	0	0	0	0	0	0
AC011243	0	0	0	0	0	0
AC011247	2.97168	3.01299	3.92327	2.98486	4.87832	3.07723
AC011284	0	0	0	0	0	0
AC011286	0	0	0	0	0	0
AC011288	23.7735	25.1083	23.5396	27.8587	22.4403	14.3604
AC011290	17.8301	14.0606	12.7506	6.96468	20.4889	14.3604
AC011294	2.97168	4.01732	2.94245	2.98486	0.975663	2.05148
AC011298	0	0	0	0	0	0
AC011306	0	0	0	0	0	0
AC011330	0	0	0	0.994955	0	0
AC011343	0	2.00866	0	0	0	0
AC011366	0	0	0	0	0	0
AC011406	0	0	0	0	0	0
AC011431	0	0	0	0	0	0
AC011513	0	0	0	0	0	0
AC011515	0	0	0	0	0	0
AC011516	0	0	0	0	0	0
AC011518	0	0	0	0	0	0
AC011523	0	0	0	0	0	0
AC011524	0	0	0	0	0	0
AC011525	0	0	0	0	0	0
AC011530	0	0	0	0	0	0
AC011551	3.96225	3.01299	0.980817	2.98486	2.92699	4.10297
AC011625	0	0	0	0	0	0
AC011648	0	0	0	0	0	0
AC011738	0.990562	1.00433	1.96163	0.994955	3.90265	0
AC011742	0	0	0.980817	0	0	0
AC011747	0	0	0	0	0	0
AC011752	0	0	0	0	0	0
AC011753	0	0	0	0	0	0
AC011754	0	0	0	0	0	0
AC011816	0	0	0	0	0	0
AC011893	0	0	0	0	0	0
AC011897	0	0	0	0	0	0
AC011899	1.98112	0	0.980817	0.994955	0	1.02574
AC011901	0	0	0	0	0	0
AC011933	0	0	0	0	0	0
AC011995	0	0	0	0	0	0
AC011997	0	0	0	0	0	0
AC011998	0	0	0	0	0	0
AC011999	0	0	0	0	0	0
AC012065	0	0	0	0.994955	0	0
AC012066	0.990562	0	0	0	1.95133	0
AC012074	0.990562	4.01732	0.980817	0	0.975663	0
AC012075	0	0	0	0	0	0
AC012078	0	0	0	0	0	0
AC012123	0	0	0	0	0	0
AC012146	283.301	264.139	349.171	304.456	300.504	288.234
AC012306	0	0	0	0	0	0
AC012307	0	0	0	0	0	0
AC012314	1.98112	3.01299	4.90408	2.98486	4.87832	7.1802
AC012322	0	0	0	0	0	0
AC012354	12.8773	6.02598	6.86572	13.9294	12.6836	21.5406
AC012358	39.6225	52.2252	39.2327	31.8385	26.3429	19.4891
AC012360	0.990562	4.01732	6.86572	4.97477	2.92699	5.12871
AC012361	0	0	0	0	0	0
AC012362	0	0	0	0	0	0
AC012363	0	0	0	0	0	0
AC012368	0	0	1.96163	0	0	0
AC012370	0	0	0	0	0	0
AC012442	4.95281	4.01732	8.82735	4.97477	3.90265	7.1802
AC012445	0	0	0	0	0	0
AC012451	0	0	0	0	0	0
AC012454	0	0	0	0	0	0
AC012456	0.990562	1.00433	0.980817	0	0	1.02574
AC012462	0	0	0	0.994955	0.975663	1.02574
AC012485	0	0	0	0	0	0
AC012493	0	0	0	0	0	0
AC012494	0.990562	1.00433	0.980817	0	0	0
AC012497	0	1.00433	0	0.994955	0	0
AC012499	0	0	0	0	0	0
AC012501	23.7735	19.0823	20.5972	1.98991	0.975663	4.10297
AC012506	0	0	0	0	0.975663	0
AC012507	0	2.00866	0	0.994955	0.975663	0
AC012512	175.329	177.767	186.355	150.238	132.69	108.729
AC012513	0	0	0.980817	0	0	0
AC012531	14.8584	16.0693	30.4053	6.96468	15.6106	14.3604
AC012593	0	0	0	0	0	0
AC012594	0	0	0	0	0	0
AC012613	0.990562	0	0	0	0	0
AC012668	0	0	0	0	0	0
AC012671	0	3.01299	0.980817	0	0	1.02574
AC013248	0	0	0	0	0	0
AC013262	0	0	0	0	0	0
AC013264	0	0	0	0	0	0
AC013267	0	0	0	0	0	0
AC013268	0	0	0	0	0	0
AC013269	0	0	0	0	0	0
AC013271	0	0	0	0	0	0
AC013275	0	0	0	0	0	0
AC013399	0	0	0	0	0	0
AC013401	0.990562	0	0.980817	0	0	0
AC013402	0	0	0	0	0	0
AC013403	0	0	0	0	0	0
AC013404	0	0	0	0	0.975663	0
AC013410	1.98112	0	0	0	0	0
AC013429	0	1.00433	0	0	0	0
AC013436	0	0	0	0	0	0
AC013439	0	0	0	0	0	0
AC013442	0	0	0	0	0	0
AC013444	1.98112	2.00866	1.96163	0.994955	0	0
AC013448	0.990562	1.00433	0	0	0	0
AC013460	0	1.00433	0	0	0	0
AC013461	330.848	338.459	288.36	550.21	595.155	574.416
AC013463	0	0	0	0	0	0
AC013467	0	0	0	0	0	0
AC013470	0	0	0	0	1.95133	0
AC013472	0.990562	1.00433	0.980817	0	0	0
AC013474	0	0	0	0	0	0
AC013480	0	0	0	0	0	0
AC013727	0	0	0	0	0	0
AC013733	0	0	0	0	0	0
AC015688	0	0	0	0	0	0
AC015691	0	0	0	0.994955	0	0
AC015818	0	0	0	0	0	0
AC015922	0	0	0.980817	0.994955	0.975663	1.02574
AC015923	0	0	0	0	0	0
AC015933	7.92449	9.03898	5.8849	7.95964	11.708	5.12871
AC015936	0	0	0	0	0	0
AC015969	0	0	0	0	0	0
AC015971	4.95281	10.0433	4.90408	6.96468	0.975663	2.05148
AC015977	0	0	0	0	0.975663	0
AC015987	0.990562	0	0.980817	0	1.95133	0
AC016292	2.97168	4.01732	0	0.994955	1.95133	1.02574
AC016561	0	0	0	0	0	0
AC016582	0	0	0.980817	0	0.975663	0
AC016629	0	0	0	0	0	0
AC016644	0	0	0	0	0	0
AC016682	0	0	0	0	0	0
AC016683	0	0	0	0	0	0
AC016691	0	0	0	0	0	0
AC016694	0	0	0	0	0	0
AC016696	0	0	0	0	0	0
AC016700	17.8301	12.052	9.80817	30.8436	42.9292	41.0297
AC016710	49.5281	32.1386	32.367	13.9294	14.6349	26.6693
AC016712	4.95281	0	4.90408	1.98991	3.90265	3.07723
AC016716	0.990562	0	0	0	0	0
AC016717	0	0	0	0	0	0
AC016722	5.94337	7.03031	3.92327	0.994955	4.87832	7.1802
AC016723	0.990562	1.00433	0.980817	0	0	1.02574
AC016724	0	0	0	0	0	0
AC016727	0	0	0	0	0	0
AC016730	0	0	0	0.994955	0	0
AC016734	0.990562	0	1.96163	0.994955	3.90265	1.02574
AC016735	272.404	280.208	260.897	259.683	191.23	182.582
AC016738	17.8301	18.078	13.7314	31.8385	28.2942	40.0039
AC016739	26.7452	28.1213	12.7506	16.9142	26.3429	18.4634
AC016745	0	2.00866	1.96163	2.98486	0	0
AC016747	328.866	370.598	308.957	310.426	308.31	299.517
AC016751	0	0	0	0	0	0
AC016757	0	0	0	0	0	0
AC016768	0	0	0	0	0	0
AC016772	0	0	0	0	0	0
AC016831	2.97168	5.02165	5.8849	29.8486	27.3186	24.6178
AC016894	0	0	0.980817	0	0	2.05148
AC016903	0	0	0	0	0	0
AC016907	0	0	0	1.98991	0	1.02574
AC016908	0	0	0	0	0	0
AC016909	0	0	0	0	0	0
AC016910	0	0	0	0	0	0
AC016912	0	0	0	0	0	0
AC016994	0	0	0	0	0	0
AC016995	5.94337	19.0823	18.6355	9.94955	10.7323	9.23168
AC016999	2.97168	0	0.980817	0	0.975663	1.02574
AC017002	0	0	0	0	0.975663	0
AC017006	0	0	0	0	0	0
AC017019	0	0	0	0	0	0
AC017035	0	0	0	0	0	0
AC017048	0	0	0	0	0	0
AC017053	0	0	0	0	0	0
AC017060	0	0	0	0	0	0
AC017074	2.97168	4.01732	4.90408	5.96973	3.90265	9.23168
AC017078	0	0	0	0	0	0
AC017079	0.990562	2.00866	0	0.994955	0	1.02574
AC017080	0	0	0	0	0	0
AC017081	0	0	0	0	0	0
AC017083	0	1.00433	0	0.994955	0	3.07723
AC017101	1.98112	0	0.980817	0	0	0
AC017104	30.7074	19.0823	30.4053	17.9092	9.75663	14.3604
AC017116	0	0	0	0	0	0
AC018359	0	0	0	0	0	0
AC018442	0	0	0	0	0	0
AC018462	0.990562	1.00433	0.980817	0	1.95133	0
AC018463	0.990562	0	0	0	0	0
AC018495	0	0	0	0	0	0
AC018634	0	0	0	0	0	0
AC018641	0	1.00433	0.980817	0	0	1.02574
AC018643	0	0	0	0	0	0
AC018647	0.990562	0	0	0.994955	3.90265	1.02574
AC018685	0	0	0	0	0	0
AC018693	0	0	0	0	0	0
AC018696	3.96225	3.01299	1.96163	1.98991	3.90265	0
AC018712	0.990562	0	0	1.98991	0.975663	1.02574
AC018717	0	0	0	0	0	0
AC018730	0	0	0	0	0	0
AC018731	1.98112	5.02165	1.96163	2.98486	0	0
AC018735	0	0	0	0	0	0
AC018737	0.990562	0	0	0	0	0
AC018738	0	0	0	0	0.975663	0
AC018742	0	0	1.96163	1.98991	3.90265	2.05148
AC018755	24.764	23.0996	14.7123	31.8385	33.1726	36.9267
AC018766	0.990562	2.00866	0.980817	0	1.95133	0
AC018799	0	0	0	0	0.975663	0
AC018804	0	0	0	0	0	0
AC018816	0.990562	0	2.94245	0.994955	1.95133	2.05148
AC018832	0	0	0.980817	0	0	0
AC018865	0	0	0	0	0	0
AC018866	0	0	0	0	0	0
AC018878	0	0	0	0	0	0
AC018880	0	0	0	0	0	0
AC018890	54.4809	50.2165	35.3094	35.8184	36.0995	50.2614
AC018892	0	0	0	0	0	0
AC019048	0.990562	0	0.980817	0	0	0
AC019050	0	1.00433	0	0	0	0
AC019055	0	0	0	0	0	0
AC019064	0	0	0	0	0	0
AC019070	0	0	0	0	0	0
AC019080	0	0	0	0	0	0
AC019084	0	0	0	0	0	0
AC019097	1.98112	0	0	1.98991	0	0
AC019109	0	0	0	0	0	0
AC019118	1.98112	1.00433	0	0	0.975663	2.05148
AC019129	0	0	0	0	0	0
AC019172	3.96225	2.00866	0.980817	2.98486	3.90265	2.05148
AC019178	0.990562	0	0	0	0	0
AC019181	0	1.00433	0	0.994955	0	0
AC019185	0	0	0	0	0	0
AC019186	0	1.00433	0	0.994955	0.975663	0
AC019330	0	0	2.94245	0	0	0
AC019349	0	0	0	0	0	0
AC020550	0	0	0	0	0	0
AC020571	15.849	17.0736	25.5012	8.95459	4.87832	10.2574
AC020594	0.990562	2.00866	0.980817	0.994955	0.975663	0
AC020595	0	0	0	0	0	0
AC020743	0	0	0	0.994955	0	0
AC020915	0	0	0	0	0	0
AC020983	0.990562	1.00433	0	1.98991	0	1.02574
AC021016	0.990562	0	0	0	1.95133	0
AC021021	0	0	0	0	0	0
AC021188	4.95281	9.03898	3.92327	8.95459	19.5133	7.1802
AC021218	10.8962	9.03898	10.789	4.97477	2.92699	3.07723
AC021224	0	0	0	0	0	0
AC021876	0.990562	0	0	0.994955	0	0
AC022007	11.8867	20.0866	19.6163	18.9041	9.75663	12.3089
AC022153	0	0	0	0	0	0
AC022154	2.97168	0	0	0	0.975663	0
AC022173	0	0	0	0	0	0
AC022182	1.98112	3.01299	0.980817	8.95459	2.92699	4.10297
AC022201	0	0	0	0	0	0
AC022210	4.95281	6.02598	6.86572	3.97982	7.80531	4.10297
AC022431	0	0	0	0	0	0
AC022486	0	0	0	0	0	0
AC022816	0	0	0	0.994955	0.975663	1.02574
AC022819	0.990562	0	0	0	0	0
AC023115	1.98112	0	0.980817	0	0	0
AC023128	0	0	0	0	0	0
AC023137	0	0	0.980817	0.994955	0.975663	0
AC023271	0	0	0	0	0	0
AC023274	0	0	0	0	0	0
AC023347	2.97168	0	0.980817	0.994955	4.87832	2.05148
AC023449	0	1.00433	0.980817	0	0.975663	0
AC023469	7.92449	6.02598	3.92327	1.98991	0.975663	0
AC023481	0	0	0	0	0	0
AC023590	0.990562	0	0	0	0	0
AC023669	0	0	0	0	0	0
AC024028	0	0	0	0	0	0
AC024067	0	0	0	0	0	0
AC024082	0	0	0.980817	1.98991	0.975663	0
AC024084	3.96225	11.0476	6.86572	1.98991	1.95133	3.07723
AC024132	0.990562	1.00433	0	0.994955	0	1.02574
AC024162	0	0	0	0	0	0
AC024560	109.952	114.494	119.66	86.561	98.542	104.626
AC024592	0	0	0	0	0	1.02574
AC024619	0	0	0	0	0	0
AC024704	0	0	0	0	0.975663	1.02574
AC024937	1.98112	2.00866	1.96163	0	1.95133	3.07723
AC025016	0	0	0	0	0	0
AC025165	12.8773	12.052	8.82735	9.94955	3.90265	8.20594
AC025171	61.4148	65.2815	47.0792	61.6872	49.7588	64.6218
AC025263	0	0	0	0	0	0
AC025335	129.764	157.68	117.698	147.253	139.52	176.428
AC025442	1.98112	1.00433	0	0.994955	0	0
AC025750	0	0	0.980817	0	0	0
AC025811	0	0	0	0	0	0
AC025918	0	1.00433	0.980817	0	0.975663	0
AC026150	0	0	0	0	0	0
AC026167	0	0	0	0	0	1.02574
AC026185	0	0	0	0	0	0
AC026188	0.990562	0	0	0	0	0
AC026202	2.97168	6.02598	10.789	3.97982	3.90265	11.2832
AC026271	21.7924	25.1083	18.6355	14.9243	16.5863	22.5663
AC026471	0.990562	1.00433	0	0	2.92699	0
AC026904	0	0	0	0	0	0
AC026954	1.98112	0	0.980817	0	0	1.02574
AC027119	0.990562	0	1.96163	0.994955	0	2.05148
AC027124	0	0	0	0	0	0
AC027601	6.93393	9.03898	13.7314	2.98486	11.708	11.2832
AC027612	341.744	302.304	309.938	480.563	514.175	505.691
AC034187	0	0	0	0	0	0
AC034198	0	0	0	0	0	0
AC034220	47.547	50.2165	47.0792	62.6821	65.3694	66.6732
AC034228	0	0	0	0	0	0
AC034243	2.97168	0	0	1.98991	1.95133	0
AC037445	0	0	0	0	0	0
AC037459	0	0	0	0	0	0
AC046143	24.764	21.0909	25.5012	21.889	17.5619	24.6178
AC051649	0	0	0	0	0	0
AC053503	0	2.00866	0.980817	1.98991	0.975663	2.05148
AC055764	0	0	0	0	0	0
AC055876	0	0	0	0	0	0
AC060834	10.8962	13.0563	11.7698	7.95964	11.708	14.3604
AC061961	0.990562	1.00433	0	0	0	0
AC061992	8.91505	14.0606	9.80817	18.9041	24.3916	19.4891
AC062016	0	0	0	0	0	0
AC062017	13.8679	18.078	11.7698	22.884	34.1482	22.5663
AC062020	0	0	0	0	0	0
AC062021	0	0	0.980817	0	0	0
AC062022	0	0	0	0	0	0
AC062028	15.849	17.0736	16.6739	0.994955	0	0
AC062029	26.7452	43.1862	33.3478	35.8184	31.2212	43.0812
AC062031	0	0	0	0	0	0
AC062032	0	0	0	0	0	0
AC063976	0.990562	2.00866	0.980817	0	0	1.02574
AC063979	0	0	0	0	0	0
AC064834	0	0	0	0	0	0
AC064836	0	2.00866	0.980817	0.994955	0	0
AC064850	5.94337	2.00866	1.96163	3.97982	1.95133	2.05148
AC064852	0	0	0	0.994955	0	1.02574
AC064853	0	0	0	0	0	0
AC064865	0	0	0	0	0	0
AC064871	0	0	0	0	0	0
AC064874	0	0	0	0	0	0
AC064875	19.8112	18.078	12.7506	12.9344	17.5619	14.3604
AC066615	0	0	0	0	0	0
AC066692	0	0	0	0	0	0
AC067940	0	0	0	0	0	0
AC067945	2.97168	6.02598	3.92327	3.97982	0.975663	5.12871
AC067956	0	0	0.980817	0	0.975663	1.02574
AC067959	0	0	0	0	0	1.02574
AC067960	0	0	0	0	0	0
AC067968	0	0	0	0	0	1.02574
AC067969	0	0	0	0	0	0
AC068042	0	0	0	0.994955	0.975663	0
AC068044	0	0	0	0	0	0
AC068057	0	0	0	0	0.975663	0
AC068134	1.98112	4.01732	5.8849	6.96468	5.85398	2.05148
AC068135	0	0	0	0	0	0
AC068137	0	0	0.980817	0	0	0
AC068138	0.990562	2.00866	2.94245	8.95459	3.90265	2.05148
AC068196	0	0	0	0	0	0
AC068279	0	0	0	0	0	0
AC068282	26.7452	20.0866	30.4053	19.8991	14.6349	14.3604
AC068286	0	0	0	0	0	0
AC068287	0	0	0	0	0	0
AC068483	0	0	0	0	0	0
AC068489	0	0	0	0	0	0
AC068490	0	0	0	0	0	0
AC068491	1.98112	1.00433	0	0	0	0
AC068492	0	0	0	0	0	0
AC068499	0	0	0.980817	0	0.975663	1.02574
AC068522	0.990562	0	0	0.994955	0	0
AC068533	0	0	0	0	0	0
AC068535	0	0	0	0	0	0
AC068538	0.990562	0	0.980817	0	0	1.02574
AC068580	61.4148	58.2512	70.6188	26.8638	26.3429	21.5406
AC068657	0.990562	0	0	0	0	0
AC068831	10.8962	13.0563	12.7506	13.9294	15.6106	14.3604
AC068858	0	0	0	0	0	0
AC069154	0	0	0	0.994955	0	0
AC069155	0	0	0	0	0	0
AC069157	0	0	0	0	0	0
AC069213	0	0	0	0	0	0
AC069257	0	0	0	0	0	0
AC069277	17.8301	21.0909	17.6547	15.9193	19.5133	27.695
AC069282	8.91505	20.0866	16.6739	15.9193	17.5619	16.4119
AC069368	0	0	0	0	0	0
AC069394	0	0	0	0	0	0
AC069513	2.97168	2.00866	0	1.98991	1.95133	1.02574
AC072052	0	0	0	0	0	0
AC072061	0	0	0	0	0	0
AC072062	0	0	0	0.994955	0	0
AC073043	0	1.00433	0.980817	0	0.975663	0
AC073046	12.8773	10.0433	10.789	10.9445	19.5133	13.3346
AC073052	1.98112	0	0	0	0	0
AC073055	0	1.00433	0	0	0	1.02574
AC073063	0	4.01732	8.82735	0.994955	4.87832	1.02574
AC073065	0	0	0.980817	0	0	1.02574
AC073069	0	0	0	0	0	0
AC073071	0	0	0	0	0	0
AC073072	2.97168	1.00433	0	0.994955	1.95133	3.07723
AC073091	1.98112	1.00433	1.96163	7.95964	3.90265	1.02574
AC073094	0	0	0	0	0	0
AC073109	0	0	0	0	0	0
AC073115	0.990562	1.00433	0	0	0	0
AC073130	21.7924	22.0953	29.4245	25.8688	36.0995	42.0554
AC073133	0	0	0	0	0	0
AC073135	0	0	0	0	0	0
AC073143	0	0	0	0	0	0
AC073150	0	0	0	0	0	0
AC073218	0	0	0	0	0	0
AC073254	9.90562	5.02165	7.84653	7.95964	9.75663	5.12871
AC073257	0	0	0	0	0	0
AC073264	0	0	0	0	0	0
AC073283	1.98112	5.02165	5.8849	8.95459	9.75663	6.15445
AC073284	0	0	0	0	0	0
AC073310	0	0	0	0	0	0
AC073316	0	0	0	0	0	0
AC073321	0.990562	0	0	0	0	1.02574
AC073325	0	0	0	0	0	0
AC073326	0	0	0	0	2.92699	2.05148
AC073333	1.98112	0	0	1.98991	3.90265	2.05148
AC073342	0.990562	1.00433	1.96163	3.97982	0	1.02574
AC073343	3.96225	2.00866	7.84653	5.96973	14.6349	7.1802
AC073387	0	1.00433	1.96163	0.994955	0	0
AC073409	0	1.00433	0.980817	3.97982	0.975663	0
AC073410	0.990562	0	0	0	0	0
AC073415	0	0	0.980817	2.98486	2.92699	2.05148
AC073464	0	0	0.980817	0	0	0
AC073465	1.98112	1.00433	0.980817	0.994955	0.975663	2.05148
AC073551	0	0	0	0	0	0
AC073610	0	0	0	0	0	0
AC073621	0	0	0	0	0	0
AC073626	0	0	0	0	0	0
AC073628	0	0	0	0	0	0
AC073635	0	0	0	0	0	0
AC073636	0	0	0	0	0	0
AC073641	0.990562	0	0	0	0.975663	0
AC073834	0	0	0	0	0	0
AC073842	0	0	0	0	0	0
AC073850	0	0	0	0	0	0
AC073869	0	0	0	0	0	0
AC073900	0	0	0	0	0	0
AC073928	0	0	0	0	0	0
AC073934	0	0	0.980817	0.994955	0.975663	1.02574
AC073957	0	0	0.980817	0	0	0
AC073987	0	0	0	0	0	0
AC074011	0	0	0	0	0	1.02574
AC074019	0	0	0	0	0	0
AC074117	86.1789	97.4201	86.3119	74.6216	88.7854	85.1366
AC074121	0	0	0	0	0	0
AC074183	4.95281	4.01732	0.980817	2.98486	0.975663	1.02574
AC074212	12.8773	18.078	15.6931	14.9243	20.4889	15.3861
AC074286	14.8584	14.0606	16.6739	25.8688	24.3916	36.9267
AC074289	30.7074	19.0823	20.5972	10.9445	13.6593	12.3089
AC074290	0	0	0	0	0.975663	0
AC074338	0	0	0.980817	0	0	0
AC074363	0	0	0.980817	0	2.92699	3.07723
AC074366	0	1.00433	0	0	0	0
AC074367	0	0	0	0	0	0
AC074375	0	0	0	0	0	0
AC074389	0	0	0	0	0	0
AC074391	5.94337	2.00866	2.94245	0.994955	2.92699	6.15445
AC078842	0	0	0	0	0	0
AC078851	0	0	0	0	0	1.02574
AC078852	0	0	0	0	1.95133	0
AC078882	0	0	0	0	0	0
AC078883	5.94337	1.00433	4.90408	0.994955	0.975663	3.07723
AC078899	4.95281	0	4.90408	5.96973	3.90265	6.15445
AC078941	0	0	0.980817	0	0	0
AC078942	0	0	0	0	0	0
AC078974	0	0	0	0	0	0
AC079112	0	0	0	0	0	0
AC079117	0	0	0	0	0	0
AC079135	0	0	0	0	0	0
AC079145	4.95281	6.02598	1.96163	7.95964	8.78097	12.3089
AC079150	0	0	0	0	1.95133	1.02574
AC079154	0	0	0	0	0	0
AC079163	0	0	0	0	0	0
AC079199	0	0	0	0	0	0
AC079248	0	0	0	0	0	0
AC079250	5.94337	12.052	12.7506	13.9294	14.6349	9.23168
AC079305	1.98112	6.02598	4.90408	2.98486	1.95133	6.15445
AC079325	0	0	0	0	0	0
AC079354	0	0	0	0	2.92699	0
AC079395	0	0	0	0	0	0
AC079448	0	0	0	0	0	0
AC079466	0	0	0	0	0	0
AC079584	0	0	0	0	0	0
AC079586	0	0	0	0	0	0
AC079610	0.990562	0	0	0.994955	0	0
AC079612	0	0	0	0	0	1.02574
AC079613	0	0	0.980817	0	0	0
AC079630	0	0	0	1.98991	0	1.02574
AC079741	0.990562	0	0	0	0	0
AC079742	0	0	0	0	0	0
AC079753	0	2.00866	0	0	0	0
AC079767	0	0	0	0	0	1.02574
AC079776	3.96225	12.052	4.90408	4.97477	2.92699	10.2574
AC079779	0.990562	0	0.980817	0	0.975663	2.05148
AC079780	0	0	0	0	0	0
AC079781	2.97168	1.00433	15.6931	1.98991	0.975663	3.07723
AC079790	0	0	0	0	0	0
AC079799	0	0	0	0	0	0
AC079807	35.6602	32.1386	26.4821	23.8789	33.1726	22.5663
AC079809	0	0	0	0	0	0
AC079834	1.98112	1.00433	0.980817	0.994955	0.975663	2.05148
AC079896	1.98112	0	0	0	0.975663	0
AC079922	134.716	145.628	124.564	74.6216	59.5155	72.8277
AC079987	0	0	0	0	0	0
AC079988	0	0	0	0	0	0
AC080002	0	0	0	0	0	0
AC080094	0	0	0	0	0	0
AC080125	0	0	0	0	0	0
AC083760	0	0	0	0	0	0
AC083822	0	0	0	0	0	0
AC083843	179.292	190.823	169.681	75.6165	59.5155	69.7505
AC083855	0	0	0	0	0	0
AC083862	0	0	0	0.994955	0	0
AC083863	0	0	0	0	0.975663	0
AC083864	0	0	0	0	0	0
AC083867	0	0	0	0	0	0
AC083873	0.990562	2.00866	0.980817	0	0.975663	2.05148
AC083875	0	0	0	0	0	0
AC083884	0	0	0	0	0	0
AC083899	11.8867	15.065	7.84653	21.889	32.1969	24.6178
AC083900	0.990562	0	0	0	0	0
AC083939	0	0	0	0	0	0
AC083949	0	0	0	0	0	0
AC084082	0	0	0	1.98991	2.92699	1.02574
AC084117	0	2.00866	1.96163	0	0.975663	0
AC084121	0	0	0	0	0	0
AC084149	0	0	1.96163	0.994955	0	1.02574
AC084193	0	0	0	0	0	0
AC084219	11.8867	6.02598	6.86572	15.9193	13.6593	13.3346
AC084290	0	0	0	0	0	0
AC084809	0	0	0	0.994955	0	3.07723
AC087073	0	0	0	0	0	0
AC087163	2.97168	3.01299	4.90408	0.994955	0.975663	3.07723
AC087294	2.97168	3.01299	2.94245	2.98486	7.80531	7.1802
AC087430	0	0	0	0	0	0
AC087491	0.990562	0	2.94245	1.98991	0	0
AC087499	50.5186	66.2858	52.9641	54.7225	40.9779	45.1327
AC087501	0.990562	0	0	0	0	0
AC087650	1.98112	3.01299	1.96163	0	1.95133	4.10297
AC090018	0	0	0	0	0	0
AC090044	0.990562	0	0.980817	0	0.975663	0
AC090283	0	0	0	0	0	0
AC090286	0.990562	0	0	0	0	1.02574
AC090453	0.990562	0	0	0	0	0
AC090505	11.8867	24.1039	15.6931	2.98486	4.87832	2.05148
AC090587	3.96225	6.02598	1.96163	2.98486	2.92699	5.12871
AC090602	0.990562	2.00866	0.980817	0.994955	0.975663	2.05148
AC090616	3.96225	2.00866	4.90408	5.96973	3.90265	8.20594
AC090617	0	0	0	0	0	0
AC090625	0	0	0	0	0	0
AC090696	0	0	0	0	0	0
AC090774	0	0	0	0	0	0
AC090804	0	0	0	0	0	0
AC090945	10.8962	20.0866	29.4245	43.778	40.0022	37.9525
AC090952	0	1.00433	0	0	0	0
AC090954	0	0	0	0	0	0
AC090955	0	0	0	0	0	0
AC090957	0	0	0	0	0	0
AC090958	0	0	0	0	0	0
AC090960	0	0	0	0	0	0
AC091069	0	0	0	0	0	0
AC091132	0	1.00433	0	0.994955	1.95133	1.02574
AC091133	0	0	0	0	0	0
AC091153	0	0	0	0	0	0
AC091177	0	0	0	0	0	0
AC091492	0	0	0	0	0	1.02574
AC091493	0	0	0	0	0	0
AC091633	6.93393	7.03031	3.92327	4.97477	5.85398	6.15445
AC091654	0.990562	4.01732	0.980817	0	5.85398	0
AC091705	0	0	0	0	0	0
AC091729	184.244	185.801	169.681	210.93	269.283	241.049
AC091770	0	0	0	0	0	0
AC091801	0.990562	2.00866	3.92327	0.994955	0.975663	5.12871
AC091813	0	0	0	0	0	0
AC091814	0	1.00433	1.96163	2.98486	0.975663	2.05148
AC091878	0	0	0	0	0	0
AC091962	0	0	0	0	0	0
AC092013	0	1.00433	0	0	0	0
AC092066	0	0	0	0	0	0
AC092071	0	0	0	0	0	0
AC092106	0	0	0	0	0	0
AC092155	2.97168	0	0	2.98486	0	2.05148
AC092159	0	1.00433	2.94245	2.98486	2.92699	6.15445
AC092162	0	1.00433	0	2.98486	0	1.02574
AC092168	1.98112	6.02598	6.86572	4.97477	4.87832	3.07723
AC092170	0	0	0	0	0	0
AC092171	363.536	358.546	356.036	376.093	328.799	346.701
AC092198	0	0	0.980817	0	0	0
AC092295	0	0	0	0	0	1.02574
AC092301	4.95281	0	0.980817	0.994955	2.92699	3.07723
AC092316	0	0	0	0	0	0
AC092415	10.8962	15.065	6.86572	8.95459	9.75663	12.3089
AC092421	0	0	0	0	0	0
AC092431	0.990562	0	0	0	0	2.05148
AC092484	0	0	0	0	0	0
AC092535	0	0	0	0	0	0
AC092566	0	0	0	0	0	0
AC092568	0	0	0	0	0	0
AC092569	0	1.00433	0	0	0	0
AC092570	0	0	0	0	0	0
AC092573	0	0	0	0	0	0
AC092578	0	0	0	0	0	0
AC092580	0	0	0.980817	1.98991	0	1.02574
AC092597	0	2.00866	0	0	0	0
AC092601	0	0	0	0	0	0
AC092610	1.98112	1.00433	0	0	1.95133	1.02574
AC092614	1.98112	2.00866	3.92327	4.97477	2.92699	2.05148
AC092620	0.990562	0	0	0	0	0
AC092625	0	0	0	0	0	0
AC092628	0	0	0	0	0	0
AC092635	0	1.00433	0	0	0	0
AC092638	0	0	0	0	0	0
AC092641	0	0	0	0	0	0
AC092642	0	0	0	0	0	0
AC092646	0	0	0	0	0	0
AC092651	0	0	0	0	0	0
AC092652	0	1.00433	0	0	0	0
AC092657	0	0	0	0	0	0
AC092660	0	0	0.980817	0	0	0
AC092664	0	0	0.980817	0	0	1.02574
AC092667	0.990562	2.00866	0	0.994955	1.95133	0
AC092669	0	0	0	0	0	0
AC092675	0	0	0	0	2.92699	0
AC092684	0	0	0	0	0	0
AC092687	0	1.00433	0	0.994955	0	0
AC092755	0	0	0	0	0	0
AC092798	1.98112	3.01299	6.86572	1.98991	2.92699	2.05148
AC092835	25.7546	23.0996	23.5396	18.9041	19.5133	26.6693
AC092839	0	0	0	0	0	0
AC092933	0.990562	0	0	0.994955	1.95133	0
AC093063	0	0	0	0	0	0
AC093074	0	0	0	0	0	0
AC093084	0	0	0	0	0	0
AC093106	0	1.00433	2.94245	1.98991	0.975663	0
AC093107	0	0	2.94245	0.994955	1.95133	0
AC093110	5.94337	5.02165	0.980817	2.98486	2.92699	2.05148
AC093142	1.98112	2.00866	2.94245	0.994955	0	0
AC093159	0	0	0	0	0	0
AC093162	1.98112	2.00866	0.980817	1.98991	2.92699	1.02574
AC093166	0	0	0	0	0	0
AC093323	639.903	603.603	626.742	890.484	937.612	961.12
AC093326	6.93393	7.03031	8.82735	15.9193	12.6836	12.3089
AC093375	0	0	0	0	0	0
AC093381	0	0	0	0	0	0
AC093382	0	0	0	0	0	0
AC093388	13.8679	19.0823	13.7314	14.9243	17.5619	12.3089
AC093390	0	0	0	0	0	1.02574
AC093484	1.98112	5.02165	2.94245	0.994955	2.92699	6.15445
AC093495	2.97168	6.02598	0.980817	1.98991	0.975663	2.05148
AC093585	0.990562	0	1.96163	0	1.95133	0
AC093590	0	0	0	0	0	0
AC093609	0	0	1.96163	0	0	0
AC093616	3.96225	6.02598	5.8849	7.95964	6.82964	5.12871
AC093620	6.93393	7.03031	6.86572	4.97477	4.87832	3.07723
AC093627	27.7357	30.1299	25.5012	12.9344	25.3672	25.6436
AC093639	0	0	0	0	0	0
AC093642	30.7074	38.1646	40.2135	40.7931	40.0022	44.1069
AC093673	96.0845	111.481	97.1009	105.465	103.42	123.089
AC093690	1.98112	2.00866	0.980817	0.994955	0.975663	0
AC093698	0.990562	1.00433	0	0	0.975663	0
AC093702	0	3.01299	0	1.98991	0	4.10297
AC093716	0	0	0	0	0	0
AC093724	29.7168	41.1776	40.2135	45.7679	40.0022	38.9782
AC093732	1.98112	1.00433	0.980817	3.97982	4.87832	6.15445
AC093787	8.91505	8.03465	7.84653	2.98486	2.92699	2.05148
AC093802	0	0	0	0	0	0
AC093818	31.698	65.2815	33.3478	11.9395	10.7323	16.4119
AC093822	0	0	0	0	0	0
AC093838	120.849	112.485	127.506	153.223	135.617	118.986
AC093843	0	0	0.980817	0	0	0
AC093850	0	0	0	0.994955	0	0
AC093899	0	0	0	0	0	0
AC093901	2.97168	1.00433	0.980817	1.98991	3.90265	2.05148
AC093911	0	0	0	0	0	0
AC094019	0	0	0	0	0	0
AC096553	0	0	0	0	0	0
AC096554	0	0	0	0	0	0
AC096558	0	0	0	0	0	0
AC096559	0	0	0	0	0	0
AC096570	0	0	0	0	0	0
AC096574	0	0	0	0	0	1.02574
AC096579	0	0	0	0	0	0
AC096582	0	0	0	0	0	0
AC096649	0	0	0	0	0	0
AC096664	1.98112	1.00433	0.980817	0.994955	0	2.05148
AC096669	7.92449	9.03898	2.94245	0	0.975663	6.15445
AC096670	0	1.00433	0	0	0	1.02574
AC096732	0	0	0	0	0	0
AC096775	0.990562	1.00433	0	0	0	0
AC096921	0	0	0	0	0	0
AC097359	0.990562	0	0	0	0	1.02574
AC097374	0.990562	0	0.980817	0	0.975663	0
AC097381	2.97168	4.01732	1.96163	0.994955	0.975663	2.05148
AC097382	0	0	0	0.994955	0	0
AC097461	2.97168	2.00866	2.94245	0.994955	0.975663	0
AC097463	0	0	0	0	0	0
AC097467	0	0	0	0	0.975663	0
AC097468	0	0	1.96163	0	0	0
AC097495	0	0	0	0	0	0
AC097499	0	0	1.96163	0	1.95133	0
AC097523	0.990562	1.00433	1.96163	0	1.95133	0
AC097532	0	0	0	0	0	0
AC097533	0.990562	0	0.980817	0	0	1.02574
AC097662	6.93393	8.03465	9.80817	10.9445	11.708	13.3346
AC097711	0	1.00433	0.980817	0	0	0
AC097713	0	0	0	0	0	0
AC097721	6.93393	8.03465	5.8849	16.9142	16.5863	21.5406
AC097724	5.94337	5.02165	1.96163	3.97982	6.82964	7.1802
AC098592	0	0	0	0	0	1.02574
AC098614	118.867	100.433	97.1009	101.485	105.372	107.703
AC098617	0	0	0	0	0	0
AC098784	0	0	0	0	0	0
AC098817	0	0	0	0	0.975663	0
AC098820	2.97168	6.02598	2.94245	4.97477	4.87832	2.05148
AC098823	0	3.01299	1.96163	1.98991	0.975663	0
AC098824	0.990562	1.00433	2.94245	1.98991	0.975663	0
AC098826	0.990562	0	0	0	0.975663	1.02574
AC098828	0	1.00433	1.96163	0.994955	0.975663	1.02574
AC098831	0	1.00433	0	0	0	0
AC098872	0	0	0	0	0	0
AC098973	0.990562	0	0	0	2.92699	0
AC099342	1.98112	0	0.980817	1.98991	0	2.05148
AC099344	0	0	0	0	0	0
AC099535	3.96225	4.01732	0.980817	0	2.92699	1.02574
AC099552	0	0	0	0	0	0
AC099668	0.990562	1.00433	0	0	0	0
AC099684	0	0	0	0	0	0
AC099754	0	0	0	0	0	0
AC099799	0	0	0	0	0	0
AC099850	13.8679	18.078	10.789	22.884	13.6593	16.4119
AC100802	29.7168	28.1213	28.4437	30.8436	25.3672	24.6178
AC100830	0	3.01299	0.980817	0.994955	0.975663	0
AC100848	0	0	0	0	0	0
AC102948	0.990562	0	0	0.994955	0	0
AC102953	1.98112	1.00433	1.96163	4.97477	0.975663	0
AC103563	0.990562	0	0	0	0	0
AC103564	0	3.01299	0.980817	0	1.95133	1.02574
AC103881	0	0	0	0	0	0
AC104024	0	1.00433	0	0.994955	0	1.02574
AC104058	0	0	0	0	0	0
AC104076	0	0	0	0	2.92699	0
AC104088	0	0	0	0	0	1.02574
AC104113	0.990562	1.00433	0.980817	0.994955	0	0
AC104131	0	0	0	0	0	1.02574
AC104134	0.990562	0	0.980817	0	0	0
AC104135	0	0	0	0	0	0
AC104297	4.95281	2.00866	8.82735	10.9445	7.80531	12.3089
AC104306	0.990562	1.00433	0	0	0	2.05148
AC104308	0	0	0	0	0	0
AC104389	157.499	166.719	185.374	297.491	272.21	261.564
AC104451	0	0	0	0	0	0
AC104532	1.98112	3.01299	3.92327	0	1.95133	2.05148
AC104534	0	0	1.96163	1.98991	0	0
AC104623	0	0	0	0	0	0
AC104634	0	0	0	0	0.975663	0
AC104651	0	1.00433	0	0	0	2.05148
AC104653	0	1.00433	0.980817	0	0	0
AC104654	0	1.00433	0	0	0	0
AC104655	0	0	0	0	0.975663	0
AC104667	8.91505	7.03031	5.8849	18.9041	21.4646	15.3861
AC104695	0	0	0	0	0	0
AC104698	0	0	0	0	0	0
AC104699	0.990562	0	0	0	0	0
AC104772	0	0	0	0	0	0
AC104777	0	0	0	0	0	0
AC104781	0	0	0	0	0	0
AC104794	0	0	0	0	0	0
AC104809	0	0	0	0	0	0
AC104820	0	1.00433	0	0	0	0
AC104843	0	4.01732	0.980817	0.994955	0	1.02574
AC104978	0.990562	1.00433	0	0.994955	0.975663	0
AC104984	0	0	0	0	0	0
AC105053	0	0	0	0	0	0
AC105339	0	0	0.980817	0	1.95133	1.02574
AC105342	1.98112	2.00866	0.980817	0.994955	0	0
AC105393	0.990562	0	0	0	1.95133	0
AC105398	0	1.00433	0	0	0	0
AC105399	1.98112	3.01299	0.980817	0.994955	0	0
AC105402	0	0	0	1.98991	0.975663	0
AC105443	0	0	0	0	0	0
AC105461	0	0	0	0	0	0
AC105760	7.92449	6.02598	8.82735	2.98486	4.87832	4.10297
AC106053	0	0	0	0	0	0
AC106706	0	0	0	0	0	0
AC106782	0	0	0	0	0	0
AC106786	0	1.00433	0	0.994955	0.975663	0
AC106801	0	1.00433	0	0	0	0
AC106869	0	1.00433	0	0	0	0
AC106870	0	0	0	0	0	0
AC106873	0	0	0	0	0	0
AC106874	0	0	0	0	0	0
AC106875	0	0	0	0	0.975663	0
AC106876	0	0	0	0	0	0
AC106883	0	0	0	0	0	0
AC106900	0	0	0	0.994955	0	0
AC106901	0	0	0	0	0	0
AC107057	0	0	0.980817	0	0	1.02574
AC107072	0	0	0.980817	0.994955	0	0
AC107079	0	0	0.980817	0	0	0
AC107081	0	0	1.96163	1.98991	2.92699	1.02574
AC107083	0	0	0	0	0	0
AC107218	6.93393	2.00866	2.94245	9.94955	12.6836	10.2574
AC107399	0	0	0	0	0	0
AC107982	0	0	0	0	0	0
AC107983	0.990562	0	0	0	0	0
AC108004	0	0	0	0	0	0
AC108025	0	0	0	0	0	0
AC108032	0	0	0	0	0	1.02574
AC108039	0	0	0.980817	0.994955	0.975663	0
AC108051	0	0	0.980817	0	0	0
AC108056	0	0	0	0	0	0
AC108059	0	0	0	0	0	0
AC108066	0	0	0	0	0	0
AC108142	123.82	128.554	124.564	147.253	197.084	193.865
AC108448	0	0	0.980817	0	0	0
AC108462	0	0	0	0	0	0
AC108463	10.8962	17.0736	10.789	10.9445	8.78097	19.4891
AC108479	0	0	0	0	0	1.02574
AC108488	86.1789	69.2988	68.6572	61.6872	89.761	90.2653
AC108676	18.8207	7.03031	11.7698	2.98486	7.80531	5.12871
AC108868	0	0	0	0	0	0
AC108938	7.92449	7.03031	8.82735	8.95459	7.80531	13.3346
AC109309	0	0	0	0	0	1.02574
AC109333	2.97168	1.00433	0.980817	4.97477	0	0
AC109589	0	0	0	0	0	0
AC109631	0.990562	0	0.980817	1.98991	2.92699	0
AC109638	0	0	0	0	0	0
AC109642	0	0	0	0	0	0
AC109815	0	0	0	0	0	0
AC109826	0	0	0	0	0	0
AC109829	0	1.00433	1.96163	0	0.975663	1.02574
AC110299	0	0	0	0	0	0
AC110620	0	0	0	0	0	0
AC110754	0	0	0	0	0	0
AC110769	0	0	0	0	0	0
AC110781	0	0	0	0	0	0
AC110926	0	0	0.980817	0	0	0
AC111155	0	0	0	0	0.975663	0
AC111200	1.98112	0	0.980817	0	0	0
AC112198	0	0	0	0	0	0
AC112220	0	0	0	0	0	0
AC112229	0	0	0	0	0	0
AC112518	0	0	0	0	0	0
AC112715	0	0	0	0	0	0
AC112721	29.7168	28.1213	43.1559	23.8789	42.9292	26.6693
AC113167	0	0	0	0	0	0
AC113189	365.517	335.446	358.979	208.94	238.062	192.84
AC113331	0	0	0	0	0	0
AC113404	4.95281	2.00866	2.94245	7.95964	4.87832	4.10297
AC113607	0	0	0	0	0	0
AC113608	0	0	0	0	0	0
AC113610	0	0	0	0	0	0
AC113617	0	0	0	0	0	0
AC113618	0	0	0	0	0	0
AC114730	0.990562	2.00866	0.980817	1.98991	2.92699	2.05148
AC114737	0	0	0	0	0	0
AC114752	0	0	0	0	0	0
AC114755	0.990562	0	0	0	0	0
AC114760	0	0	0	0	0	0
AC114763	0	0	0	0	0	0
AC114765	2.97168	1.00433	0	1.98991	1.95133	0
AC114776	0	0	0	0.994955	0	1.02574
AC114783	0	0	0	0	0	0
AC114803	0.990562	1.00433	1.96163	0	0.975663	0
AC114808	0	0	0	0	0	1.02574
AC114812	0	0	0	0	0	0
AC114813	0	0	0	0	0	0
AC114814	0	0	0	0	0	0
AC114877	0	0	0	0	0	0
AC114973	0	0	0	0	0	0
AC115115	0	0	0	0	0	0
AC115283	0	0	0	0	0	0
AC115522	0	0	0.980817	0.994955	0	0
AC115617	0.990562	1.00433	0	1.98991	1.95133	2.05148
AC116035	0	0	0.980817	0	0	0
AC116366	6.93393	3.01299	4.90408	7.95964	2.92699	0
AC116609	0	0	0	0	0	0
AC116614	0	0	0	0.994955	0	0
AC117490	0	0	0	0	0	0
AC117947	3.96225	3.01299	2.94245	4.97477	3.90265	4.10297
AC118345	0	0	0	0	0	0
AC118653	0	0	0	0	0	0
AC118754	0	0	0	0	0	1.02574
AC119403	0	0	0	0	0	0
AC121251	0	0	0	0	0	0
AC122136	0	0	0	0	0	0
AC123023	0	0	0	0	0	0
AC123886	0	0	0	0	0	0
AC123900	0	0	0	0	0	0
AC124057	0	0	0	0	0	0
AC124861	0	1.00433	0.980817	0	0	0
AC124914	0	0	0.980817	0	0	0
AC124944	0	0	0	0.994955	0	0
AC124997	0	0	0	0.994955	0	0
AC125232	34.6697	38.1646	32.367	63.6771	82.9314	49.2356
AC125238	0.990562	0	0	0.994955	0	0
AC125421	0	0	0	0	0	0
AC125634	0	0	0	0	0	0
AC126365	17.8301	18.078	21.578	12.9344	13.6593	16.4119
AC127383	0	0	0	0	0	0
AC127391	0	0	0	0	0	0
AC127904	0	1.00433	0.980817	0.994955	0	1.02574
AC128677	0	1.00433	0	0	0	0
AC128709	1.98112	1.00433	0.980817	10.9445	9.75663	3.07723
AC129492	12.8773	9.03898	6.86572	11.9395	10.7323	16.4119
AC129778	0	0	0	0	0	0
AC130360	0	0	0	0	0	0
AC130464	0	0	0	0	0	0
AC130469	0	0	0	0	0	0
AC130689	0	0	0	0	0	0
AC130709	0	0	0	0	0	0
AC131097	0	0	0	0	0	0
AC132008	0	0	0	0	0	0
AC132217	0	0	0	0	0	0
AC132479	0	0	0	0	0	0
AC132807	0	0	0	0	0	0
AC133104	0	0	0	0	0	0
AC133106	0	0	0	0	0	0
AC133141	0	0	0	0	0	0
AC133633	0	0	0	0	0	0
AC133644	0	0	0	0	0	0
AC133680	0	0	0	1.98991	0	0
AC133785	6.93393	8.03465	7.84653	5.96973	11.708	5.12871
AC133965	0	0	0	0	0	0
AC134915	0	0	0	0	0	0
AC135048	0.990562	1.00433	0	0	0	0
AC135050	0	0	0.980817	0	0	0
AC135178	0	0	0	0	0	0
AC135999	0	0	0	0	0	0
AC136289	0.990562	2.00866	0.980817	0.994955	0.975663	1.02574
AC136896	0	0	0	0	0	0
AC137527	0	0	0	0	0	0
AC137675	0	0	0	0	0	0
AC137723	0.990562	0	0	0	0	0
AC137932	27.7357	45.1949	43.1559	21.889	19.5133	24.6178
AC137934	0.990562	2.00866	0	0	1.95133	1.02574
AC138035	0	1.00433	0.980817	0.994955	0	2.05148
AC138430	0	0	0	0	0	0
AC138472	0	0	0	0	0	0
AC138517	0	1.00433	0.980817	0.994955	1.95133	1.02574
AC138623	1.98112	0	0	0	0.975663	0
AC138647	0	0	0	0	0	0
AC138744	0	0	0.980817	0	0	0
AC138969	0	1.00433	0	0	0	1.02574
AC139085	0	0	0	0	0	0
AC139099	0	0	0.980817	0.994955	1.95133	1.02574
AC139100	0.990562	1.00433	2.94245	0.994955	0	0
AC139103	0	1.00433	0	0	0	0
AC139143	0	0	0	0	0	0
AC139712	0	1.00433	0	0.994955	0	0
AC139887	3.96225	4.01732	0	1.98991	4.87832	1.02574
AC140076	0	0	1.96163	0.994955	0	1.02574
AC140481	0	0	0	0	0	0
AC140542	0	2.00866	0	0	0	0
AC140725	0	0	0	0	0	0
AC140912	0	0	0	0	0	0
AC141586	48.5375	61.2642	57.8682	82.5812	89.761	111.806
AC141928	0	0	0	0	0	1.02574
AC141930	0	1.00433	0	0	0	0
AC142119	0	0	0	0	0	0
AC142293	0	0	0	0	0	0
AC142528	4.95281	9.03898	7.84653	8.95459	3.90265	4.10297
AC144449	0	2.00866	0	0	0.975663	0
AC144450	0	0	0	0.994955	0.975663	2.05148
AC144525	0	0	0	0	0	0
AC144530	3.96225	5.02165	5.8849	10.9445	3.90265	3.07723
AC144568	0	0	0	0.994955	0.975663	0
AC144652	123.82	166.719	141.238	115.415	118.055	127.192
AC144831	27.7357	26.1126	13.7314	12.9344	16.5863	30.7723
AC144833	0	0	0	0	0	0
AC144835	3.96225	8.03465	8.82735	0	0	0
AC144836	0.990562	0	0.980817	0	0	0
AC144838	0.990562	0	0.980817	0	0	0
AC145110	6.93393	7.03031	2.94245	0	0	0
AC145124	1.98112	2.00866	0.980817	1.98991	6.82964	3.07723
AC145343	0	2.00866	0.980817	0	1.95133	0
AC145676	0	0	1.96163	0	0	1.02574
AC147651	0.990562	2.00866	2.94245	0	1.95133	0
AC151960	0	0	0	0	0	0
AC152010	0	0	0	0	0	0
AC156455	2.97168	17.0736	6.86572	10.9445	15.6106	10.2574
AC159540	2.97168	12.052	12.7506	0.994955	0	0
AC195454	0.990562	0	1.96163	0.994955	0	1.02574
AC226118	0	0	1.96163	1.98991	0.975663	3.07723
AC226119	0	0	0	0	0	0
AC226150	0	0	0	0	0	0
ACA59	0	1.00433	0	0	0	0
ACA64	0	0	0	0.994955	0	0
ACAA1	744.902	735.17	669.898	534.291	514.175	414.4
ACAA2	277.357	280.208	252.07	303.461	315.139	393.885
ACACB	159.48	172.745	168.7	103.475	84.8827	71.802
ACAD10	431.885	464.001	480.6	527.326	474.172	453.378
ACAD11	0	0	0	0	0.975663	0
ACAD8	441.79	424.832	428.617	358.184	355.141	388.756
ACAD9	580.469	586.529	594.375	632.791	597.106	714.942
ACADL	7.92449	9.03898	11.7698	13.9294	12.6836	13.3346
ACADM	1045.04	998.305	1051.44	939.237	954.199	988.815
ACADS	454.668	458.979	430.579	393.007	329.774	325.16
ACADSB	480.422	451.949	403.116	278.587	285.869	271.822
ACADVL	12662.3	13397.8	12259.2	10201.3	9785.9	9675.83
ACAN	120.849	80.3465	97.1009	42.783	27.3186	20.5148
ACAP1	94.1034	99.4287	98.0817	81.5863	75.1261	111.806
ACAP2	810.279	878.789	802.308	911.378	968.834	1104.72
ACAP2-IT1	0	0	0.980817	1.98991	0	2.05148
ACAP3	971.741	983.24	971.009	892.474	760.042	749.818
ACAT1	1527.45	1445.23	1471.23	1858.58	1829.37	1966.35
ACAT2	1611.64	1755.57	1574.21	452.704	367.825	327.212
ACBD3	2579.42	2475.68	2558.95	2474.45	2464.53	2587.95
ACBD4	215.942	262.13	211.856	334.305	300.504	276.95
ACBD5	864.76	902.893	815.059	935.257	832.241	864.701
ACBD6	64.3865	70.3031	64.7339	74.6216	67.3208	70.7762
ACBD7	8.91505	17.0736	13.7314	8.95459	10.7323	10.2574
ACCS	438.819	436.884	403.116	369.128	327.823	357.984
ACCSL	0	0	0	0	0	0
ACD	412.074	458.979	416.847	578.069	580.52	515.948
ACE	2.97168	5.02165	1.96163	18.9041	15.6106	12.3089
ACE2	0	1.00433	1.96163	0.994955	0	0
ACE3P	0	0	0	0	0	0
ACEA_U3	0	0	0	0	0	0
ACER1	0	0	0	0	0	0
ACER2	11.8867	9.03898	13.7314	23.8789	29.2699	26.6693
ACER3	643.865	631.724	636.55	471.608	478.075	528.257
ACHE	1.98112	5.02165	5.8849	15.9193	11.708	13.3346
ACIN1	2482.35	2565.06	2561.89	2309.29	2006.94	1905.83
ACKR1	0	0	0	0	0	0
ACKR2	0.990562	1.00433	0	0.994955	1.95133	3.07723
ACKR3	0	0	0.980817	0.994955	0.975663	1.02574
ACKR4	2.97168	2.00866	0	0.994955	0.975663	1.02574
ACLY	10229.5	10764.4	10322.1	6462.23	6741.83	6250.87
ACMSD	0	0	0.980817	0	0	1.02574
ACO1	1020.28	1021.4	965.124	809.893	825.411	921.116
ACO2	929.147	938.045	917.064	1147.18	1173.72	1070.87
ACOD1	0	0	0	0	0	0
ACOT1	35.6602	22.0953	22.5588	22.884	23.4159	18.4634
ACOT11	2.97168	4.01732	3.92327	0.994955	3.90265	1.02574
ACOT12	0	0	0	0	0	0
ACOT13	309.055	306.321	324.65	297.491	322.945	307.723
ACOT2	328.866	309.334	327.593	320.375	321.969	333.366
ACOT4	0	1.00433	0	0.994955	0	0
ACOT6	0	0	0	0	0	2.05148
ACOT7	3504.61	3534.24	3602.54	3963.9	4333.9	4172.72
ACOT8	680.516	714.079	831.733	771.09	845.9	800.079
ACOT9	1532.4	1526.58	1475.15	2179.95	2276.22	2308.95
ACOX1	642.874	568.451	559.066	497.477	502.467	555.952
ACOX2	162.452	186.806	161.835	110.44	89.761	106.677
ACOX3	398.206	373.611	362.902	339.279	342.458	365.164
ACOXL	0	1.00433	0	2.98486	0	1.02574
ACP1	2352.58	2409.39	2516.78	2830.65	2942.6	3013.63
ACP2	716.176	705.04	736.593	506.432	444.902	453.378
ACP5	647.827	632.728	599.279	287.542	231.232	286.182
ACP6	822.166	907.915	781.711	905.409	890.781	893.421
ACP7	1.98112	0	1.96163	0.994955	0	0
ACPP	9.90562	17.0736	13.7314	13.9294	10.7323	2.05148
ACPT	0	1.00433	2.94245	0	0	2.05148
ACR	0	0	0	0.994955	0	0
ACRBP	5.94337	2.00866	0.980817	1.98991	4.87832	1.02574
ACRC	45.5658	47.2035	56.8874	18.9041	23.4159	31.798
ACRV1	3.96225	10.0433	5.8849	6.96468	5.85398	7.1802
ACSBG1	10.8962	7.03031	9.80817	2.98486	0	2.05148
ACSBG2	1.98112	1.00433	0.980817	3.97982	0.975663	3.07723
ACSF2	215.942	202.875	216.76	195.011	156.106	158.99
ACSF3	648.818	611.637	660.09	685.524	637.108	640.063
ACSL1	4596.21	4470.28	4420.54	1555.11	1537.65	1596.05
ACSL3	8333.59	9215.74	8583.13	2781.89	2429.4	2630
ACSL4	2061.36	2167.35	2022.44	1199.92	1332.76	1412.45
ACSL5	27.7357	21.0909	30.4053	23.8789	25.3672	37.9525
ACSL6	2.97168	1.00433	2.94245	1.98991	2.92699	1.02574
ACSM1	0	0	0	0	0	0
ACSM2A	0	0	0	0	0	0
ACSM2B	0.990562	0	0	0	0	0
ACSM3	6.93393	4.01732	5.8849	7.95964	4.87832	7.1802
ACSM4	2.97168	1.00433	0.980817	5.96973	1.95133	0
ACSM5	2.97168	2.00866	0.980817	1.98991	0	3.07723
ACSM5P1	0	0	0	0	0	0
ACSM6	0	0	0	0	0	0
ACSS1	218.914	203.879	193.221	213.915	200.987	238.998
ACSS2	4175.22	4908.16	4377.39	1092.46	968.834	902.653
ACSS3	436.838	435.88	425.674	273.612	252.697	244.127
ACTA1	0	3.01299	1.96163	1.98991	3.90265	1.02574
ACTA2	63.3959	61.2642	37.271	151.233	187.327	180.531
ACTA2-AS1	0.990562	1.00433	0	0	0	1.02574
ACTB	18731.5	18441.5	19428	25223.1	27703	29520.9
ACTBL2	0.990562	9.03898	1.96163	13.9294	10.7323	9.23168
ACTBP1	0	2.00866	0	0	0	1.02574
ACTBP11	0.990562	2.00866	0.980817	0.994955	1.95133	1.02574
ACTBP12	0	0	0	0	0	0
ACTBP13	0	0	0.980817	0.994955	0	0
ACTBP14	0.990562	0	0	0	0	0
ACTBP2	6.93393	1.00433	5.8849	1.98991	2.92699	5.12871
ACTBP6	0	0	0	0	0	0
ACTBP7	0.990562	4.01732	2.94245	2.98486	2.92699	3.07723
ACTBP8	13.8679	13.0563	21.578	19.8991	17.5619	22.5663
ACTBP9	0	0	0	0	0.975663	2.05148
ACTC1	0	0	0	0.994955	0	0
ACTG1	26957.1	27308.8	26370.2	25471.8	22643.2	23011.5
ACTG1P1	4.95281	10.0433	3.92327	8.95459	6.82964	5.12871
ACTG1P10	0.990562	1.00433	0	0.994955	0.975663	0
ACTG1P11	0	0	0	0	0	0
ACTG1P12	0.990562	1.00433	0	1.98991	2.92699	2.05148
ACTG1P13	0	0	0	0	0	0
ACTG1P14	0.990562	1.00433	0.980817	0.994955	0	3.07723
ACTG1P15	0	0	0	0	0.975663	0
ACTG1P16	0	0	0	0	0.975663	0
ACTG1P17	8.91505	12.052	12.7506	9.94955	9.75663	13.3346
ACTG1P18	0	1.00433	0	0	0	0
ACTG1P19	0	0	0	0.994955	0	0
ACTG1P2	0	0	0	0	0	0
ACTG1P20	5.94337	15.065	13.7314	4.97477	2.92699	5.12871
ACTG1P21	1.98112	1.00433	0	0	0	1.02574
ACTG1P22	0	0	0.980817	0	0	0
ACTG1P23	1.98112	0	0	1.98991	1.95133	1.02574
ACTG1P24	0.990562	1.00433	4.90408	0	0.975663	3.07723
ACTG1P3	4.95281	4.01732	1.96163	0.994955	4.87832	3.07723
ACTG1P4	0	0	0	0	0	0
ACTG1P9	1.98112	0	1.96163	0.994955	0	0
ACTG2	0	0	0	0	0	0
ACTL10	125.801	124.537	123.583	276.597	239.038	235.921
ACTL6A	830.091	810.495	895.486	1117.33	1122.01	1079.08
ACTL6B	0	0	0	0	0	0
ACTL7A	0	0	0	0	0	0
ACTL7B	0	0	0	0	0	0
ACTL8	0	3.01299	0.980817	6.96468	9.75663	9.23168
ACTL9	0	0	0	0	0	0
ACTN1	5634.31	5539.89	5885.88	5642.39	6075.46	6137.02
ACTN1-AS1	1.98112	3.01299	1.96163	0.994955	3.90265	2.05148
ACTN2	63.3959	45.1949	47.0792	36.8133	45.8562	54.3643
ACTN3	0	0	0.980817	0	0	0
ACTN4	23245.5	22153.5	23064.9	22992.4	23368.1	25104
ACTN4P1	0.990562	2.00866	0	1.98991	1.95133	0
ACTN4P2	0	0	0	0	0	0
ACTP1	0	0	0	0	0	0
ACTR10	1031.17	975.205	1276.04	906.404	925.904	952.914
ACTR1A	2505.13	2527.9	2444.2	2384.91	2427.45	2382.8
ACTR1B	1666.12	1661.16	1624.23	1374.03	1460.57	1454.5
ACTR2	6384.17	6128.43	5694.62	6626.4	6284.25	6219.07
ACTR3	3824.56	3713.01	3941.9	3889.28	4173.89	4189.13
ACTR3B	250.612	229.992	234.415	263.663	254.648	267.719
ACTR3BP1	0	0	0	0	0	0
ACTR3BP2	0	0	0	0	0	0
ACTR3BP3	0	0	0	0	0	0
ACTR3BP4	0	0	0	0	0	0
ACTR3BP5	0	0	0	0	0	0
ACTR3BP6	0	0	0	0	0	0
ACTR3C	0	0	0	0.994955	0.975663	0
ACTR3P2	0	0	0	0.994955	0	1.02574
ACTR3P3	0	0	0	0	0.975663	0
ACTR5	259.527	269.161	261.878	272.618	277.088	261.564
ACTR6	983.628	874.772	1305.47	924.313	1050.79	998.047
ACTR6P1	0	0	0	0	0	0
ACTR8	508.158	531.291	479.619	525.336	445.878	498.511
ACTRT1	0	0	0	0	0	0
ACTRT2	0	0	0	0	0	0
ACTRT3	15.849	19.0823	26.4821	21.889	20.4889	26.6693
ACVR1	452.687	435.88	425.674	328.335	361.971	457.481
ACVR1B	538.866	538.321	549.257	633.786	597.106	627.754
ACVR1C	7.92449	3.01299	4.90408	1.98991	2.92699	5.12871
ACVR2A	130.754	117.507	112.794	138.299	134.642	121.038
ACVR2B	247.64	248.07	253.051	240.779	248.794	282.079
ACVR2B-AS1	18.8207	31.1343	23.5396	39.7982	39.0265	31.798
ACVRL1	20.8018	26.1126	9.80817	12.9344	24.3916	14.3604
ACY1	44.5753	54.2339	51.0025	86.561	82.9314	70.7762
ACY3	1.98112	3.01299	0.980817	1.98991	0	0
ACYP1	138.679	161.697	176.547	135.314	126.836	148.733
ACYP2	231.791	247.065	245.204	208.94	206.841	212.329
AD000091	0	0	0	0	0	0
AD000671	0	0	0	0	0	0
AD000684	23.7735	17.0736	23.5396	11.9395	12.6836	13.3346
AD001527	0	0	0	0	0.975663	0
ADA	234.763	232	209.895	248.739	252.697	227.715
ADAD1	0	0	0	0.994955	0	0
ADAD1P2	0	0	0	0	0	0
ADAD2	0.990562	0	0	0	2.92699	1.02574
ADAL	360.564	335.446	344.267	417.881	433.195	433.889
ADAM10	3215.36	3259.05	3240.62	2229.69	2194.27	2387.93
ADAM11	48.5375	36.1559	50.0217	23.8789	19.5133	19.4891
ADAM12	129.764	116.502	107.89	14.9243	23.4159	12.3089
ADAM15	6044.41	6129.43	6177.18	8076.05	8058.98	7999.76
ADAM17	1312.49	1270.48	1349.6	1156.14	1143.48	1211.4
ADAM18	0.990562	3.01299	0	0	0.975663	0
ADAM19	763.723	835.603	766.018	215.905	185.376	243.101
ADAM1A	29.7168	26.1126	28.4437	47.7578	41.9535	33.8495
ADAM1B	2.97168	6.02598	0	1.98991	2.92699	7.1802
ADAM2	0	0	0	0	0	0
ADAM20	0.990562	2.00866	0	0	0.975663	1.02574
ADAM20P1	0.990562	1.00433	1.96163	0.994955	0.975663	2.05148
ADAM20P2	0	0	0	0	0	0
ADAM20P3	0	1.00433	0	0	0	0
ADAM21	11.8867	8.03465	6.86572	4.97477	7.80531	4.10297
ADAM21P1	0.990562	0	0	0	0	0
ADAM22	134.716	145.628	132.41	94.5207	91.7124	115.909
[truncated: 43,022 more rows]

## Sheet: DeSeq2
Gene	baseMean	log2FoldChange coculture vs. monoculture	lfcSE	stat	pvalue	padj
5S_rRNA	0	NA	NA	NA	NA	#VALUE!
A2ML1-AS1	0	NA	NA	NA	NA	#VALUE!
A2ML1-AS2	0	NA	NA	NA	NA	#VALUE!
AA06	0	NA	NA	NA	NA	#VALUE!
AADAC	0	NA	NA	NA	NA	#VALUE!
AADACL2	0	NA	NA	NA	NA	#VALUE!
AADACL2-AS1	0	NA	NA	NA	NA	#VALUE!
AADACL3	0	NA	NA	NA	NA	#VALUE!
AARSP1	0	NA	NA	NA	NA	#VALUE!
AB019440	0	NA	NA	NA	NA	#VALUE!
ABC12-47043100G14	0	NA	NA	NA	NA	#VALUE!
ABCA9-AS1	0	NA	NA	NA	NA	#VALUE!
ABCB11	0	NA	NA	NA	NA	#VALUE!
ABCC12	0	NA	NA	NA	NA	#VALUE!
ABCC8	0	NA	NA	NA	NA	#VALUE!
ABCD1P3	0	NA	NA	NA	NA	#VALUE!
ABCD1P4	0	NA	NA	NA	NA	#VALUE!
ABCD1P5	0	NA	NA	NA	NA	#VALUE!
ABCF2P2	0	NA	NA	NA	NA	#VALUE!
ABHD15-AS1	0	NA	NA	NA	NA	#VALUE!
ABHD17AP1	0	NA	NA	NA	NA	#VALUE!
ABHD17AP4	0	NA	NA	NA	NA	#VALUE!
ABHD17AP6	0	NA	NA	NA	NA	#VALUE!
ABHD17AP7	0	NA	NA	NA	NA	#VALUE!
ABHD17AP8	0	NA	NA	NA	NA	#VALUE!
ABHD17AP9	0	NA	NA	NA	NA	#VALUE!
ABO	0	NA	NA	NA	NA	#VALUE!
ABRA	0	NA	NA	NA	NA	#VALUE!
ABT1P1	0	NA	NA	NA	NA	#VALUE!
AC000032	0	NA	NA	NA	NA	#VALUE!
AC000036	0	NA	NA	NA	NA	#VALUE!
AC000041	0	NA	NA	NA	NA	#VALUE!
AC000067	0	NA	NA	NA	NA	#VALUE!
AC000077	0	NA	NA	NA	NA	#VALUE!
AC000081	0	NA	NA	NA	NA	#VALUE!
AC000095	0	NA	NA	NA	NA	#VALUE!
AC000099	0	NA	NA	NA	NA	#VALUE!
AC000124	0	NA	NA	NA	NA	#VALUE!
AC000362	0	NA	NA	NA	NA	#VALUE!
AC000367	0	NA	NA	NA	NA	#VALUE!
AC000370	0	NA	NA	NA	NA	#VALUE!
AC000374	0	NA	NA	NA	NA	#VALUE!
AC002115	0	NA	NA	NA	NA	#VALUE!
AC002127	0	NA	NA	NA	NA	#VALUE!
AC002306	0	NA	NA	NA	NA	#VALUE!
AC002331	0	NA	NA	NA	NA	#VALUE!
AC002366	0	NA	NA	NA	NA	#VALUE!
AC002368	0	NA	NA	NA	NA	#VALUE!
AC002386	0	NA	NA	NA	NA	#VALUE!
AC002400	0	NA	NA	NA	NA	#VALUE!
AC002401	0	NA	NA	NA	NA	#VALUE!
AC002463	0	NA	NA	NA	NA	#VALUE!
AC002465	0	NA	NA	NA	NA	#VALUE!
AC002511	0	NA	NA	NA	NA	#VALUE!
AC002523	0	NA	NA	NA	NA	#VALUE!
AC002539	0	NA	NA	NA	NA	#VALUE!
AC002542	0	NA	NA	NA	NA	#VALUE!
AC002543	0	NA	NA	NA	NA	#VALUE!
AC002550	0	NA	NA	NA	NA	#VALUE!
AC002551	0	NA	NA	NA	NA	#VALUE!
AC002553	0	NA	NA	NA	NA	#VALUE!
AC002985	0	NA	NA	NA	NA	#VALUE!
AC003003	0	NA	NA	NA	NA	#VALUE!
AC003005	0	NA	NA	NA	NA	#VALUE!
AC003006	0	NA	NA	NA	NA	#VALUE!
AC003045	0	NA	NA	NA	NA	#VALUE!
AC003084	0	NA	NA	NA	NA	#VALUE!
AC003973	0	NA	NA	NA	NA	#VALUE!
AC003984	0	NA	NA	NA	NA	#VALUE!
AC003985	0	NA	NA	NA	NA	#VALUE!
AC003988	0	NA	NA	NA	NA	#VALUE!
AC004004	0	NA	NA	NA	NA	#VALUE!
AC004006	0	NA	NA	NA	NA	#VALUE!
AC004009	0	NA	NA	NA	NA	#VALUE!
AC004014	0	NA	NA	NA	NA	#VALUE!
AC004022	0	NA	NA	NA	NA	#VALUE!
AC004051	0	NA	NA	NA	NA	#VALUE!
AC004054	0	NA	NA	NA	NA	#VALUE!
AC004057	0	NA	NA	NA	NA	#VALUE!
AC004062	0	NA	NA	NA	NA	#VALUE!
AC004063	0	NA	NA	NA	NA	#VALUE!
AC004066	0	NA	NA	NA	NA	#VALUE!
AC004070	0	NA	NA	NA	NA	#VALUE!
AC004074	0	NA	NA	NA	NA	#VALUE!
AC004125	0	NA	NA	NA	NA	#VALUE!
AC004158	0	NA	NA	NA	NA	#VALUE!
AC004160	0	NA	NA	NA	NA	#VALUE!
AC004231	0	NA	NA	NA	NA	#VALUE!
AC004257	0	NA	NA	NA	NA	#VALUE!
AC004448	0	NA	NA	NA	NA	#VALUE!
AC004485	0	NA	NA	NA	NA	#VALUE!
AC004535	0	NA	NA	NA	NA	#VALUE!
AC004543	0	NA	NA	NA	NA	#VALUE!
AC004603	0	NA	NA	NA	NA	#VALUE!
AC004623	0	NA	NA	NA	NA	#VALUE!
AC004702	0	NA	NA	NA	NA	#VALUE!
AC004744	0	NA	NA	NA	NA	#VALUE!
AC004754	0	NA	NA	NA	NA	#VALUE!
AC004775	0	NA	NA	NA	NA	#VALUE!
AC004862	0	NA	NA	NA	NA	#VALUE!
AC004866	0	NA	NA	NA	NA	#VALUE!
AC004869	0	NA	NA	NA	NA	#VALUE!
AC004899	0	NA	NA	NA	NA	#VALUE!
AC004901	0	NA	NA	NA	NA	#VALUE!
AC004911	0	NA	NA	NA	NA	#VALUE!
AC004938	0	NA	NA	NA	NA	#VALUE!
AC004941	0	NA	NA	NA	NA	#VALUE!
AC004947	0	NA	NA	NA	NA	#VALUE!
AC005008	0	NA	NA	NA	NA	#VALUE!
AC005033	0	NA	NA	NA	NA	#VALUE!
AC005034	0	NA	NA	NA	NA	#VALUE!
AC005040	0	NA	NA	NA	NA	#VALUE!
AC005041	0	NA	NA	NA	NA	#VALUE!
AC005062	0	NA	NA	NA	NA	#VALUE!
AC005082	0	NA	NA	NA	NA	#VALUE!
AC005094	0	NA	NA	NA	NA	#VALUE!
AC005102	0	NA	NA	NA	NA	#VALUE!
AC005105	0	NA	NA	NA	NA	#VALUE!
AC005160	0	NA	NA	NA	NA	#VALUE!
AC005162	0	NA	NA	NA	NA	#VALUE!
AC005176	0	NA	NA	NA	NA	#VALUE!
AC005178	0	NA	NA	NA	NA	#VALUE!
AC005189	0	NA	NA	NA	NA	#VALUE!
AC005235	0	NA	NA	NA	NA	#VALUE!
AC005276	0	NA	NA	NA	NA	#VALUE!
AC005301	0	NA	NA	NA	NA	#VALUE!
AC005304	0	NA	NA	NA	NA	#VALUE!
AC005324	0	NA	NA	NA	NA	#VALUE!
AC005339	0	NA	NA	NA	NA	#VALUE!
AC005357	0	NA	NA	NA	NA	#VALUE!
AC005363	0	NA	NA	NA	NA	#VALUE!
AC005391	0	NA	NA	NA	NA	#VALUE!
AC005392	0	NA	NA	NA	NA	#VALUE!
AC005394	0	NA	NA	NA	NA	#VALUE!
AC005481	0	NA	NA	NA	NA	#VALUE!
AC005487	0	NA	NA	NA	NA	#VALUE!
AC005488	0	NA	NA	NA	NA	#VALUE!
AC005518	0	NA	NA	NA	NA	#VALUE!
AC005522	0	NA	NA	NA	NA	#VALUE!
AC005538	0	NA	NA	NA	NA	#VALUE!
AC005539	0	NA	NA	NA	NA	#VALUE!
AC005559	0	NA	NA	NA	NA	#VALUE!
AC005588	0	NA	NA	NA	NA	#VALUE!
AC005597	0	NA	NA	NA	NA	#VALUE!
AC005606	0	NA	NA	NA	NA	#VALUE!
AC005609	0	NA	NA	NA	NA	#VALUE!
AC005616	0	NA	NA	NA	NA	#VALUE!
AC005626	0	NA	NA	NA	NA	#VALUE!
AC005730	0	NA	NA	NA	NA	#VALUE!
AC005741	0	NA	NA	NA	NA	#VALUE!
AC005757	0	NA	NA	NA	NA	#VALUE!
AC005758	0	NA	NA	NA	NA	#VALUE!
AC005772	0	NA	NA	NA	NA	#VALUE!
AC005777	0	NA	NA	NA	NA	#VALUE!
AC005779	0	NA	NA	NA	NA	#VALUE!
AC005780	0	NA	NA	NA	NA	#VALUE!
AC005789	0	NA	NA	NA	NA	#VALUE!
AC005794	0	NA	NA	NA	NA	#VALUE!
AC005808	0	NA	NA	NA	NA	#VALUE!
AC005838	0	NA	NA	NA	NA	#VALUE!
AC005863	0	NA	NA	NA	NA	#VALUE!
AC005943	0	NA	NA	NA	NA	#VALUE!
AC005944	0	NA	NA	NA	NA	#VALUE!
AC006003	0	NA	NA	NA	NA	#VALUE!
AC006007	0	NA	NA	NA	NA	#VALUE!
AC006011	0	NA	NA	NA	NA	#VALUE!
AC006014	0	NA	NA	NA	NA	#VALUE!
AC006022	0	NA	NA	NA	NA	#VALUE!
AC006037	0	NA	NA	NA	NA	#VALUE!
AC006041	0	NA	NA	NA	NA	#VALUE!
AC006050	0	NA	NA	NA	NA	#VALUE!
AC006070	0	NA	NA	NA	NA	#VALUE!
AC006076	0	NA	NA	NA	NA	#VALUE!
AC006077	0	NA	NA	NA	NA	#VALUE!
AC006115	0	NA	NA	NA	NA	#VALUE!
AC006133	0	NA	NA	NA	NA	#VALUE!
AC006145	0	NA	NA	NA	NA	#VALUE!
AC006150	0	NA	NA	NA	NA	#VALUE!
AC006153	0	NA	NA	NA	NA	#VALUE!
AC006196	0	NA	NA	NA	NA	#VALUE!
AC006227	0	NA	NA	NA	NA	#VALUE!
AC006272	0	NA	NA	NA	NA	#VALUE!
AC006277	0	NA	NA	NA	NA	#VALUE!
AC006296	0	NA	NA	NA	NA	#VALUE!
AC006326	0	NA	NA	NA	NA	#VALUE!
AC006328	0	NA	NA	NA	NA	#VALUE!
AC006335	0	NA	NA	NA	NA	#VALUE!
AC006355	0	NA	NA	NA	NA	#VALUE!
AC006366	0	NA	NA	NA	NA	#VALUE!
AC006380	0	NA	NA	NA	NA	#VALUE!
AC006390	0	NA	NA	NA	NA	#VALUE!
AC006427	0	NA	NA	NA	NA	#VALUE!
AC006458	0	NA	NA	NA	NA	#VALUE!
AC006461	0	NA	NA	NA	NA	#VALUE!
AC006466	0	NA	NA	NA	NA	#VALUE!
AC006482	0	NA	NA	NA	NA	#VALUE!
AC006486	0	NA	NA	NA	NA	#VALUE!
AC006499	0	NA	NA	NA	NA	#VALUE!
AC006548	0	NA	NA	NA	NA	#VALUE!
AC006552	0	NA	NA	NA	NA	#VALUE!
AC006947	0	NA	NA	NA	NA	#VALUE!
AC006960	0	NA	NA	NA	NA	#VALUE!
AC007003	0	NA	NA	NA	NA	#VALUE!
AC007009	0	NA	NA	NA	NA	#VALUE!
AC007036	0	NA	NA	NA	NA	#VALUE!
AC007050	0	NA	NA	NA	NA	#VALUE!
AC007064	0	NA	NA	NA	NA	#VALUE!
AC007078	0	NA	NA	NA	NA	#VALUE!
AC007098	0	NA	NA	NA	NA	#VALUE!
AC007099	0	NA	NA	NA	NA	#VALUE!
AC007115	0	NA	NA	NA	NA	#VALUE!
AC007136	0	NA	NA	NA	NA	#VALUE!
AC007179	0	NA	NA	NA	NA	#VALUE!
AC007182	0	NA	NA	NA	NA	#VALUE!
AC007192	0	NA	NA	NA	NA	#VALUE!
AC007237	0	NA	NA	NA	NA	#VALUE!
AC007249	0	NA	NA	NA	NA	#VALUE!
AC007250	0	NA	NA	NA	NA	#VALUE!
AC007253	0	NA	NA	NA	NA	#VALUE!
AC007271	0	NA	NA	NA	NA	#VALUE!
AC007272	0	NA	NA	NA	NA	#VALUE!
AC007274	0	NA	NA	NA	NA	#VALUE!
AC007278	0	NA	NA	NA	NA	#VALUE!
AC007308	0	NA	NA	NA	NA	#VALUE!
AC007312	0	NA	NA	NA	NA	#VALUE!
AC007317	0	NA	NA	NA	NA	#VALUE!
AC007322	0	NA	NA	NA	NA	#VALUE!
AC007326	0	NA	NA	NA	NA	#VALUE!
AC007327	0	NA	NA	NA	NA	#VALUE!
AC007349	0	NA	NA	NA	NA	#VALUE!
AC007359	0	NA	NA	NA	NA	#VALUE!
AC007364	0	NA	NA	NA	NA	#VALUE!
AC007381	0	NA	NA	NA	NA	#VALUE!
AC007386	0	NA	NA	NA	NA	#VALUE!
AC007387	0	NA	NA	NA	NA	#VALUE!
AC007390	0	NA	NA	NA	NA	#VALUE!
AC007394	0	NA	NA	NA	NA	#VALUE!
AC007422	0	NA	NA	NA	NA	#VALUE!
AC007461	0	NA	NA	NA	NA	#VALUE!
AC007463	0	NA	NA	NA	NA	#VALUE!
AC007556	0	NA	NA	NA	NA	#VALUE!
AC007557	0	NA	NA	NA	NA	#VALUE!
AC007559	0	NA	NA	NA	NA	#VALUE!
AC007562	0	NA	NA	NA	NA	#VALUE!
AC007568	0	NA	NA	NA	NA	#VALUE!
AC007618	0	NA	NA	NA	NA	#VALUE!
AC007631	0	NA	NA	NA	NA	#VALUE!
AC007652	0	NA	NA	NA	NA	#VALUE!
AC007677	0	NA	NA	NA	NA	#VALUE!
AC007679	0	NA	NA	NA	NA	#VALUE!
AC007682	0	NA	NA	NA	NA	#VALUE!
AC007740	0	NA	NA	NA	NA	#VALUE!
AC007742	0	NA	NA	NA	NA	#VALUE!
AC007750	0	NA	NA	NA	NA	#VALUE!
AC007787	0	NA	NA	NA	NA	#VALUE!
AC007795	0	NA	NA	NA	NA	#VALUE!
AC007796	0	NA	NA	NA	NA	#VALUE!
AC007875	0	NA	NA	NA	NA	#VALUE!
AC007881	0	NA	NA	NA	NA	#VALUE!
AC007919	0	NA	NA	NA	NA	#VALUE!
AC007950	0	NA	NA	NA	NA	#VALUE!
AC007967	0	NA	NA	NA	NA	#VALUE!
AC008067	0	NA	NA	NA	NA	#VALUE!
AC008072	0	NA	NA	NA	NA	#VALUE!
AC008079	0	NA	NA	NA	NA	#VALUE!
AC008154	0	NA	NA	NA	NA	#VALUE!
AC008171	0	NA	NA	NA	NA	#VALUE!
AC008173	0	NA	NA	NA	NA	#VALUE!
AC008175	0	NA	NA	NA	NA	#VALUE!
AC008264	0	NA	NA	NA	NA	#VALUE!
AC008271	0	NA	NA	NA	NA	#VALUE!
AC008277	0	NA	NA	NA	NA	#VALUE!
AC008281	0	NA	NA	NA	NA	#VALUE!
AC008565	0	NA	NA	NA	NA	#VALUE!
AC008691	0	NA	NA	NA	NA	#VALUE!
AC008697	0	NA	NA	NA	NA	#VALUE!
AC008703	0	NA	NA	NA	NA	#VALUE!
AC008834	0	NA	NA	NA	NA	#VALUE!
AC008940	0	NA	NA	NA	NA	#VALUE!
AC008984	0	NA	NA	NA	NA	#VALUE!
AC008991	0	NA	NA	NA	NA	#VALUE!
AC008992	0	NA	NA	NA	NA	#VALUE!
AC009014	0	NA	NA	NA	NA	#VALUE!
AC009052	0	NA	NA	NA	NA	#VALUE!
AC009110	0	NA	NA	NA	NA	#VALUE!
AC009134	0	NA	NA	NA	NA	#VALUE!
AC009158	0	NA	NA	NA	NA	#VALUE!
AC009161	0	NA	NA	NA	NA	#VALUE!
AC009227	0	NA	NA	NA	NA	#VALUE!
AC009236	0	NA	NA	NA	NA	#VALUE!
AC009238	0	NA	NA	NA	NA	#VALUE!
AC009276	0	NA	NA	NA	NA	#VALUE!
AC009303	0	NA	NA	NA	NA	#VALUE!
AC009305	0	NA	NA	NA	NA	#VALUE!
AC009310	0	NA	NA	NA	NA	#VALUE!
AC009312	0	NA	NA	NA	NA	#VALUE!
AC009313	0	NA	NA	NA	NA	#VALUE!
AC009365	0	NA	NA	NA	NA	#VALUE!
AC009411	0	NA	NA	NA	NA	#VALUE!
AC009473	0	NA	NA	NA	NA	#VALUE!
AC009494	0	NA	NA	NA	NA	#VALUE!
AC009498	0	NA	NA	NA	NA	#VALUE!
AC009500	0	NA	NA	NA	NA	#VALUE!
AC009505	0	NA	NA	NA	NA	#VALUE!
AC009508	0	NA	NA	NA	NA	#VALUE!
AC009517	0	NA	NA	NA	NA	#VALUE!
AC009541	0	NA	NA	NA	NA	#VALUE!
AC009542	0	NA	NA	NA	NA	#VALUE!
AC009878	0	NA	NA	NA	NA	#VALUE!
AC009892	0	NA	NA	NA	NA	#VALUE!
AC009945	0	NA	NA	NA	NA	#VALUE!
AC009947	0	NA	NA	NA	NA	#VALUE!
AC009955	0	NA	NA	NA	NA	#VALUE!
AC009965	0	NA	NA	NA	NA	#VALUE!
AC009967	0	NA	NA	NA	NA	#VALUE!
AC009969	0	NA	NA	NA	NA	#VALUE!
AC009970	0	NA	NA	NA	NA	#VALUE!
AC010082	0	NA	NA	NA	NA	#VALUE!
AC010086	0	NA	NA	NA	NA	#VALUE!
AC010096	0	NA	NA	NA	NA	#VALUE!
AC010105	0	NA	NA	NA	NA	#VALUE!
AC010136	0	NA	NA	NA	NA	#VALUE!
AC010141	0	NA	NA	NA	NA	#VALUE!
AC010145	0	NA	NA	NA	NA	#VALUE!
AC010153	0	NA	NA	NA	NA	#VALUE!
AC010154	0	NA	NA	NA	NA	#VALUE!
AC010518	0	NA	NA	NA	NA	#VALUE!
AC010547	0	NA	NA	NA	NA	#VALUE!
AC010641	0	NA	NA	NA	NA	#VALUE!
AC010646	0	NA	NA	NA	NA	#VALUE!
AC010649	0	NA	NA	NA	NA	#VALUE!
AC010723	0	NA	NA	NA	NA	#VALUE!
AC010740	0	NA	NA	NA	NA	#VALUE!
AC010744	0	NA	NA	NA	NA	#VALUE!
AC010745	0	NA	NA	NA	NA	#VALUE!
AC010746	0	NA	NA	NA	NA	#VALUE!
AC010880	0	NA	NA	NA	NA	#VALUE!
AC010886	0	NA	NA	NA	NA	#VALUE!
AC010891	0	NA	NA	NA	NA	#VALUE!
AC010907	0	NA	NA	NA	NA	#VALUE!
AC010969	0	NA	NA	NA	NA	#VALUE!
AC010970	0	NA	NA	NA	NA	#VALUE!
AC010971	0	NA	NA	NA	NA	#VALUE!
AC010975	0	NA	NA	NA	NA	#VALUE!
AC010982	0	NA	NA	NA	NA	#VALUE!
AC010983	0	NA	NA	NA	NA	#VALUE!
AC011193	0	NA	NA	NA	NA	#VALUE!
AC011196	0	NA	NA	NA	NA	#VALUE!
AC011225	0	NA	NA	NA	NA	#VALUE!
AC011233	0	NA	NA	NA	NA	#VALUE!
AC011239	0	NA	NA	NA	NA	#VALUE!
AC011242	0	NA	NA	NA	NA	#VALUE!
AC011243	0	NA	NA	NA	NA	#VALUE!
AC011284	0	NA	NA	NA	NA	#VALUE!
AC011286	0	NA	NA	NA	NA	#VALUE!
AC011298	0	NA	NA	NA	NA	#VALUE!
AC011306	0	NA	NA	NA	NA	#VALUE!
AC011366	0	NA	NA	NA	NA	#VALUE!
AC011406	0	NA	NA	NA	NA	#VALUE!
AC011431	0	NA	NA	NA	NA	#VALUE!
AC011513	0	NA	NA	NA	NA	#VALUE!
AC011515	0	NA	NA	NA	NA	#VALUE!
AC011516	0	NA	NA	NA	NA	#VALUE!
AC011518	0	NA	NA	NA	NA	#VALUE!
AC011523	0	NA	NA	NA	NA	#VALUE!
AC011524	0	NA	NA	NA	NA	#VALUE!
AC011525	0	NA	NA	NA	NA	#VALUE!
AC011530	0	NA	NA	NA	NA	#VALUE!
AC011625	0	NA	NA	NA	NA	#VALUE!
AC011648	0	NA	NA	NA	NA	#VALUE!
AC011747	0	NA	NA	NA	NA	#VALUE!
AC011752	0	NA	NA	NA	NA	#VALUE!
AC011753	0	NA	NA	NA	NA	#VALUE!
AC011754	0	NA	NA	NA	NA	#VALUE!
AC011816	0	NA	NA	NA	NA	#VALUE!
AC011893	0	NA	NA	NA	NA	#VALUE!
AC011897	0	NA	NA	NA	NA	#VALUE!
AC011901	0	NA	NA	NA	NA	#VALUE!
AC011933	0	NA	NA	NA	NA	#VALUE!
AC011995	0	NA	NA	NA	NA	#VALUE!
AC011997	0	NA	NA	NA	NA	#VALUE!
AC011998	0	NA	NA	NA	NA	#VALUE!
AC011999	0	NA	NA	NA	NA	#VALUE!
AC012075	0	NA	NA	NA	NA	#VALUE!
AC012078	0	NA	NA	NA	NA	#VALUE!
AC012123	0	NA	NA	NA	NA	#VALUE!
AC012306	0	NA	NA	NA	NA	#VALUE!
AC012307	0	NA	NA	NA	NA	#VALUE!
AC012322	0	NA	NA	NA	NA	#VALUE!
AC012361	0	NA	NA	NA	NA	#VALUE!
AC012362	0	NA	NA	NA	NA	#VALUE!
AC012363	0	NA	NA	NA	NA	#VALUE!
AC012370	0	NA	NA	NA	NA	#VALUE!
AC012445	0	NA	NA	NA	NA	#VALUE!
AC012451	0	NA	NA	NA	NA	#VALUE!
AC012454	0	NA	NA	NA	NA	#VALUE!
AC012485	0	NA	NA	NA	NA	#VALUE!
AC012493	0	NA	NA	NA	NA	#VALUE!
AC012499	0	NA	NA	NA	NA	#VALUE!
AC012593	0	NA	NA	NA	NA	#VALUE!
AC012594	0	NA	NA	NA	NA	#VALUE!
AC012668	0	NA	NA	NA	NA	#VALUE!
AC013248	0	NA	NA	NA	NA	#VALUE!
AC013262	0	NA	NA	NA	NA	#VALUE!
AC013264	0	NA	NA	NA	NA	#VALUE!
AC013267	0	NA	NA	NA	NA	#VALUE!
AC013268	0	NA	NA	NA	NA	#VALUE!
AC013269	0	NA	NA	NA	NA	#VALUE!
AC013271	0	NA	NA	NA	NA	#VALUE!
AC013275	0	NA	NA	NA	NA	#VALUE!
AC013399	0	NA	NA	NA	NA	#VALUE!
AC013402	0	NA	NA	NA	NA	#VALUE!
AC013403	0	NA	NA	NA	NA	#VALUE!
AC013436	0	NA	NA	NA	NA	#VALUE!
AC013439	0	NA	NA	NA	NA	#VALUE!
AC013442	0	NA	NA	NA	NA	#VALUE!
AC013463	0	NA	NA	NA	NA	#VALUE!
AC013467	0	NA	NA	NA	NA	#VALUE!
AC013474	0	NA	NA	NA	NA	#VALUE!
AC013480	0	NA	NA	NA	NA	#VALUE!
AC013727	0	NA	NA	NA	NA	#VALUE!
AC013733	0	NA	NA	NA	NA	#VALUE!
AC015688	0	NA	NA	NA	NA	#VALUE!
AC015818	0	NA	NA	NA	NA	#VALUE!
AC015923	0	NA	NA	NA	NA	#VALUE!
AC015936	0	NA	NA	NA	NA	#VALUE!
AC015969	0	NA	NA	NA	NA	#VALUE!
AC016561	0	NA	NA	NA	NA	#VALUE!
AC016629	0	NA	NA	NA	NA	#VALUE!
AC016644	0	NA	NA	NA	NA	#VALUE!
AC016682	0	NA	NA	NA	NA	#VALUE!
AC016683	0	NA	NA	NA	NA	#VALUE!
AC016691	0	NA	NA	NA	NA	#VALUE!
AC016694	0	NA	NA	NA	NA	#VALUE!
AC016696	0	NA	NA	NA	NA	#VALUE!
AC016717	0	NA	NA	NA	NA	#VALUE!
AC016724	0	NA	NA	NA	NA	#VALUE!
AC016727	0	NA	NA	NA	NA	#VALUE!
AC016751	0	NA	NA	NA	NA	#VALUE!
AC016757	0	NA	NA	NA	NA	#VALUE!
AC016768	0	NA	NA	NA	NA	#VALUE!
AC016772	0	NA	NA	NA	NA	#VALUE!
AC016903	0	NA	NA	NA	NA	#VALUE!
AC016908	0	NA	NA	NA	NA	#VALUE!
AC016909	0	NA	NA	NA	NA	#VALUE!
AC016910	0	NA	NA	NA	NA	#VALUE!
AC016912	0	NA	NA	NA	NA	#VALUE!
AC016994	0	NA	NA	NA	NA	#VALUE!
AC017006	0	NA	NA	NA	NA	#VALUE!
AC017019	0	NA	NA	NA	NA	#VALUE!
AC017035	0	NA	NA	NA	NA	#VALUE!
AC017048	0	NA	NA	NA	NA	#VALUE!
AC017053	0	NA	NA	NA	NA	#VALUE!
AC017060	0	NA	NA	NA	NA	#VALUE!
AC017078	0	NA	NA	NA	NA	#VALUE!
AC017080	0	NA	NA	NA	NA	#VALUE!
AC017081	0	NA	NA	NA	NA	#VALUE!
AC017116	0	NA	NA	NA	NA	#VALUE!
AC018359	0	NA	NA	NA	NA	#VALUE!
AC018442	0	NA	NA	NA	NA	#VALUE!
AC018495	0	NA	NA	NA	NA	#VALUE!
AC018634	0	NA	NA	NA	NA	#VALUE!
AC018643	0	NA	NA	NA	NA	#VALUE!
AC018685	0	NA	NA	NA	NA	#VALUE!
AC018693	0	NA	NA	NA	NA	#VALUE!
AC018717	0	NA	NA	NA	NA	#VALUE!
AC018730	0	NA	NA	NA	NA	#VALUE!
AC018735	0	NA	NA	NA	NA	#VALUE!
AC018804	0	NA	NA	NA	NA	#VALUE!
AC018865	0	NA	NA	NA	NA	#VALUE!
AC018866	0	NA	NA	NA	NA	#VALUE!
AC018878	0	NA	NA	NA	NA	#VALUE!
AC018880	0	NA	NA	NA	NA	#VALUE!
AC018892	0	NA	NA	NA	NA	#VALUE!
AC019055	0	NA	NA	NA	NA	#VALUE!
AC019064	0	NA	NA	NA	NA	#VALUE!
AC019070	0	NA	NA	NA	NA	#VALUE!
AC019080	0	NA	NA	NA	NA	#VALUE!
AC019084	0	NA	NA	NA	NA	#VALUE!
AC019109	0	NA	NA	NA	NA	#VALUE!
AC019129	0	NA	NA	NA	NA	#VALUE!
AC019185	0	NA	NA	NA	NA	#VALUE!
AC019349	0	NA	NA	NA	NA	#VALUE!
AC020550	0	NA	NA	NA	NA	#VALUE!
AC020595	0	NA	NA	NA	NA	#VALUE!
AC020915	0	NA	NA	NA	NA	#VALUE!
AC021021	0	NA	NA	NA	NA	#VALUE!
AC021224	0	NA	NA	NA	NA	#VALUE!
AC022153	0	NA	NA	NA	NA	#VALUE!
AC022173	0	NA	NA	NA	NA	#VALUE!
AC022201	0	NA	NA	NA	NA	#VALUE!
AC022431	0	NA	NA	NA	NA	#VALUE!
AC022486	0	NA	NA	NA	NA	#VALUE!
AC023128	0	NA	NA	NA	NA	#VALUE!
AC023271	0	NA	NA	NA	NA	#VALUE!
AC023274	0	NA	NA	NA	NA	#VALUE!
AC023481	0	NA	NA	NA	NA	#VALUE!
AC023669	0	NA	NA	NA	NA	#VALUE!
AC024028	0	NA	NA	NA	NA	#VALUE!
AC024067	0	NA	NA	NA	NA	#VALUE!
AC024162	0	NA	NA	NA	NA	#VALUE!
AC024619	0	NA	NA	NA	NA	#VALUE!
AC025016	0	NA	NA	NA	NA	#VALUE!
AC025263	0	NA	NA	NA	NA	#VALUE!
AC025811	0	NA	NA	NA	NA	#VALUE!
AC026150	0	NA	NA	NA	NA	#VALUE!
AC026185	0	NA	NA	NA	NA	#VALUE!
AC026904	0	NA	NA	NA	NA	#VALUE!
AC027124	0	NA	NA	NA	NA	#VALUE!
AC034187	0	NA	NA	NA	NA	#VALUE!
AC034198	0	NA	NA	NA	NA	#VALUE!
AC034228	0	NA	NA	NA	NA	#VALUE!
AC037445	0	NA	NA	NA	NA	#VALUE!
AC037459	0	NA	NA	NA	NA	#VALUE!
AC051649	0	NA	NA	NA	NA	#VALUE!
AC055764	0	NA	NA	NA	NA	#VALUE!
AC055876	0	NA	NA	NA	NA	#VALUE!
AC062016	0	NA	NA	NA	NA	#VALUE!
AC062020	0	NA	NA	NA	NA	#VALUE!
AC062022	0	NA	NA	NA	NA	#VALUE!
AC062031	0	NA	NA	NA	NA	#VALUE!
AC062032	0	NA	NA	NA	NA	#VALUE!
AC063979	0	NA	NA	NA	NA	#VALUE!
AC064834	0	NA	NA	NA	NA	#VALUE!
AC064853	0	NA	NA	NA	NA	#VALUE!
AC064865	0	NA	NA	NA	NA	#VALUE!
AC064871	0	NA	NA	NA	NA	#VALUE!
AC064874	0	NA	NA	NA	NA	#VALUE!
AC066615	0	NA	NA	NA	NA	#VALUE!
AC066692	0	NA	NA	NA	NA	#VALUE!
AC067940	0	NA	NA	NA	NA	#VALUE!
AC067960	0	NA	NA	NA	NA	#VALUE!
AC067969	0	NA	NA	NA	NA	#VALUE!
AC068044	0	NA	NA	NA	NA	#VALUE!
AC068135	0	NA	NA	NA	NA	#VALUE!
AC068196	0	NA	NA	NA	NA	#VALUE!
AC068279	0	NA	NA	NA	NA	#VALUE!
AC068286	0	NA	NA	NA	NA	#VALUE!
AC068287	0	NA	NA	NA	NA	#VALUE!
AC068483	0	NA	NA	NA	NA	#VALUE!
AC068489	0	NA	NA	NA	NA	#VALUE!
AC068490	0	NA	NA	NA	NA	#VALUE!
AC068492	0	NA	NA	NA	NA	#VALUE!
AC068533	0	NA	NA	NA	NA	#VALUE!
AC068535	0	NA	NA	NA	NA	#VALUE!
AC068858	0	NA	NA	NA	NA	#VALUE!
AC069155	0	NA	NA	NA	NA	#VALUE!
AC069157	0	NA	NA	NA	NA	#VALUE!
AC069213	0	NA	NA	NA	NA	#VALUE!
AC069257	0	NA	NA	NA	NA	#VALUE!
AC069368	0	NA	NA	NA	NA	#VALUE!
AC069394	0	NA	NA	NA	NA	#VALUE!
AC072052	0	NA	NA	NA	NA	#VALUE!
AC072061	0	NA	NA	NA	NA	#VALUE!
AC073069	0	NA	NA	NA	NA	#VALUE!
AC073071	0	NA	NA	NA	NA	#VALUE!
AC073094	0	NA	NA	NA	NA	#VALUE!
AC073109	0	NA	NA	NA	NA	#VALUE!
AC073133	0	NA	NA	NA	NA	#VALUE!
AC073135	0	NA	NA	NA	NA	#VALUE!
AC073143	0	NA	NA	NA	NA	#VALUE!
AC073150	0	NA	NA	NA	NA	#VALUE!
AC073218	0	NA	NA	NA	NA	#VALUE!
AC073257	0	NA	NA	NA	NA	#VALUE!
AC073264	0	NA	NA	NA	NA	#VALUE!
AC073284	0	NA	NA	NA	NA	#VALUE!
AC073310	0	NA	NA	NA	NA	#VALUE!
AC073316	0	NA	NA	NA	NA	#VALUE!
AC073325	0	NA	NA	NA	NA	#VALUE!
AC073551	0	NA	NA	NA	NA	#VALUE!
AC073610	0	NA	NA	NA	NA	#VALUE!
AC073621	0	NA	NA	NA	NA	#VALUE!
AC073626	0	NA	NA	NA	NA	#VALUE!
AC073628	0	NA	NA	NA	NA	#VALUE!
AC073635	0	NA	NA	NA	NA	#VALUE!
AC073636	0	NA	NA	NA	NA	#VALUE!
AC073834	0	NA	NA	NA	NA	#VALUE!
AC073842	0	NA	NA	NA	NA	#VALUE!
AC073850	0	NA	NA	NA	NA	#VALUE!
AC073869	0	NA	NA	NA	NA	#VALUE!
AC073900	0	NA	NA	NA	NA	#VALUE!
AC073928	0	NA	NA	NA	NA	#VALUE!
AC073987	0	NA	NA	NA	NA	#VALUE!
AC074019	0	NA	NA	NA	NA	#VALUE!
AC074121	0	NA	NA	NA	NA	#VALUE!
AC074367	0	NA	NA	NA	NA	#VALUE!
AC074375	0	NA	NA	NA	NA	#VALUE!
AC074389	0	NA	NA	NA	NA	#VALUE!
AC078842	0	NA	NA	NA	NA	#VALUE!
AC078882	0	NA	NA	NA	NA	#VALUE!
AC078942	0	NA	NA	NA	NA	#VALUE!
AC078974	0	NA	NA	NA	NA	#VALUE!
AC079112	0	NA	NA	NA	NA	#VALUE!
AC079117	0	NA	NA	NA	NA	#VALUE!
AC079135	0	NA	NA	NA	NA	#VALUE!
AC079154	0	NA	NA	NA	NA	#VALUE!
AC079163	0	NA	NA	NA	NA	#VALUE!
AC079199	0	NA	NA	NA	NA	#VALUE!
AC079248	0	NA	NA	NA	NA	#VALUE!
AC079325	0	NA	NA	NA	NA	#VALUE!
AC079395	0	NA	NA	NA	NA	#VALUE!
AC079448	0	NA	NA	NA	NA	#VALUE!
AC079466	0	NA	NA	NA	NA	#VALUE!
AC079584	0	NA	NA	NA	NA	#VALUE!
AC079586	0	NA	NA	NA	NA	#VALUE!
AC079742	0	NA	NA	NA	NA	#VALUE!
AC079780	0	NA	NA	NA	NA	#VALUE!
AC079790	0	NA	NA	NA	NA	#VALUE!
AC079799	0	NA	NA	NA	NA	#VALUE!
AC079809	0	NA	NA	NA	NA	#VALUE!
AC079987	0	NA	NA	NA	NA	#VALUE!
AC079988	0	NA	NA	NA	NA	#VALUE!
AC080002	0	NA	NA	NA	NA	#VALUE!
AC080094	0	NA	NA	NA	NA	#VALUE!
AC080125	0	NA	NA	NA	NA	#VALUE!
AC083760	0	NA	NA	NA	NA	#VALUE!
AC083822	0	NA	NA	NA	NA	#VALUE!
AC083855	0	NA	NA	NA	NA	#VALUE!
AC083864	0	NA	NA	NA	NA	#VALUE!
AC083867	0	NA	NA	NA	NA	#VALUE!
AC083875	0	NA	NA	NA	NA	#VALUE!
AC083884	0	NA	NA	NA	NA	#VALUE!
AC083939	0	NA	NA	NA	NA	#VALUE!
AC083949	0	NA	NA	NA	NA	#VALUE!
AC084121	0	NA	NA	NA	NA	#VALUE!
AC084193	0	NA	NA	NA	NA	#VALUE!
AC084290	0	NA	NA	NA	NA	#VALUE!
AC087073	0	NA	NA	NA	NA	#VALUE!
AC087430	0	NA	NA	NA	NA	#VALUE!
AC090018	0	NA	NA	NA	NA	#VALUE!
AC090283	0	NA	NA	NA	NA	#VALUE!
AC090617	0	NA	NA	NA	NA	#VALUE!
AC090625	0	NA	NA	NA	NA	#VALUE!
AC090696	0	NA	NA	NA	NA	#VALUE!
AC090774	0	NA	NA	NA	NA	#VALUE!
AC090804	0	NA	NA	NA	NA	#VALUE!
AC090954	0	NA	NA	NA	NA	#VALUE!
AC090955	0	NA	NA	NA	NA	#VALUE!
AC090957	0	NA	NA	NA	NA	#VALUE!
AC090958	0	NA	NA	NA	NA	#VALUE!
AC090960	0	NA	NA	NA	NA	#VALUE!
AC091069	0	NA	NA	NA	NA	#VALUE!
AC091133	0	NA	NA	NA	NA	#VALUE!
AC091153	0	NA	NA	NA	NA	#VALUE!
AC091177	0	NA	NA	NA	NA	#VALUE!
AC091493	0	NA	NA	NA	NA	#VALUE!
AC091705	0	NA	NA	NA	NA	#VALUE!
AC091770	0	NA	NA	NA	NA	#VALUE!
AC091813	0	NA	NA	NA	NA	#VALUE!
AC091878	0	NA	NA	NA	NA	#VALUE!
AC091962	0	NA	NA	NA	NA	#VALUE!
AC092066	0	NA	NA	NA	NA	#VALUE!
AC092071	0	NA	NA	NA	NA	#VALUE!
AC092106	0	NA	NA	NA	NA	#VALUE!
AC092170	0	NA	NA	NA	NA	#VALUE!
AC092316	0	NA	NA	NA	NA	#VALUE!
AC092421	0	NA	NA	NA	NA	#VALUE!
AC092484	0	NA	NA	NA	NA	#VALUE!
AC092535	0	NA	NA	NA	NA	#VALUE!
AC092566	0	NA	NA	NA	NA	#VALUE!
AC092568	0	NA	NA	NA	NA	#VALUE!
AC092570	0	NA	NA	NA	NA	#VALUE!
AC092573	0	NA	NA	NA	NA	#VALUE!
AC092578	0	NA	NA	NA	NA	#VALUE!
AC092601	0	NA	NA	NA	NA	#VALUE!
AC092625	0	NA	NA	NA	NA	#VALUE!
AC092628	0	NA	NA	NA	NA	#VALUE!
AC092638	0	NA	NA	NA	NA	#VALUE!
AC092641	0	NA	NA	NA	NA	#VALUE!
AC092642	0	NA	NA	NA	NA	#VALUE!
AC092646	0	NA	NA	NA	NA	#VALUE!
AC092651	0	NA	NA	NA	NA	#VALUE!
AC092657	0	NA	NA	NA	NA	#VALUE!
AC092669	0	NA	NA	NA	NA	#VALUE!
AC092684	0	NA	NA	NA	NA	#VALUE!
AC092755	0	NA	NA	NA	NA	#VALUE!
AC092839	0	NA	NA	NA	NA	#VALUE!
AC093063	0	NA	NA	NA	NA	#VALUE!
AC093074	0	NA	NA	NA	NA	#VALUE!
AC093084	0	NA	NA	NA	NA	#VALUE!
AC093159	0	NA	NA	NA	NA	#VALUE!
AC093166	0	NA	NA	NA	NA	#VALUE!
AC093375	0	NA	NA	NA	NA	#VALUE!
AC093381	0	NA	NA	NA	NA	#VALUE!
AC093382	0	NA	NA	NA	NA	#VALUE!
AC093590	0	NA	NA	NA	NA	#VALUE!
AC093639	0	NA	NA	NA	NA	#VALUE!
AC093716	0	NA	NA	NA	NA	#VALUE!
AC093802	0	NA	NA	NA	NA	#VALUE!
AC093822	0	NA	NA	NA	NA	#VALUE!
AC093899	0	NA	NA	NA	NA	#VALUE!
AC093911	0	NA	NA	NA	NA	#VALUE!
AC094019	0	NA	NA	NA	NA	#VALUE!
AC096553	0	NA	NA	NA	NA	#VALUE!
AC096554	0	NA	NA	NA	NA	#VALUE!
AC096558	0	NA	NA	NA	NA	#VALUE!
AC096559	0	NA	NA	NA	NA	#VALUE!
AC096570	0	NA	NA	NA	NA	#VALUE!
AC096579	0	NA	NA	NA	NA	#VALUE!
AC096582	0	NA	NA	NA	NA	#VALUE!
AC096649	0	NA	NA	NA	NA	#VALUE!
AC096732	0	NA	NA	NA	NA	#VALUE!
AC096921	0	NA	NA	NA	NA	#VALUE!
AC097463	0	NA	NA	NA	NA	#VALUE!
AC097495	0	NA	NA	NA	NA	#VALUE!
AC097532	0	NA	NA	NA	NA	#VALUE!
AC097713	0	NA	NA	NA	NA	#VALUE!
AC098617	0	NA	NA	NA	NA	#VALUE!
AC098784	0	NA	NA	NA	NA	#VALUE!
AC098872	0	NA	NA	NA	NA	#VALUE!
AC099344	0	NA	NA	NA	NA	#VALUE!
AC099552	0	NA	NA	NA	NA	#VALUE!
AC099684	0	NA	NA	NA	NA	#VALUE!
AC099754	0	NA	NA	NA	NA	#VALUE!
AC099799	0	NA	NA	NA	NA	#VALUE!
AC100848	0	NA	NA	NA	NA	#VALUE!
AC103881	0	NA	NA	NA	NA	#VALUE!
AC104058	0	NA	NA	NA	NA	#VALUE!
AC104135	0	NA	NA	NA	NA	#VALUE!
AC104308	0	NA	NA	NA	NA	#VALUE!
AC104451	0	NA	NA	NA	NA	#VALUE!
AC104623	0	NA	NA	NA	NA	#VALUE!
AC104695	0	NA	NA	NA	NA	#VALUE!
AC104698	0	NA	NA	NA	NA	#VALUE!
AC104772	0	NA	NA	NA	NA	#VALUE!
AC104777	0	NA	NA	NA	NA	#VALUE!
AC104781	0	NA	NA	NA	NA	#VALUE!
AC104794	0	NA	NA	NA	NA	#VALUE!
AC104809	0	NA	NA	NA	NA	#VALUE!
AC104984	0	NA	NA	NA	NA	#VALUE!
AC105053	0	NA	NA	NA	NA	#VALUE!
AC105443	0	NA	NA	NA	NA	#VALUE!
AC105461	0	NA	NA	NA	NA	#VALUE!
AC106053	0	NA	NA	NA	NA	#VALUE!
AC106706	0	NA	NA	NA	NA	#VALUE!
AC106782	0	NA	NA	NA	NA	#VALUE!
AC106870	0	NA	NA	NA	NA	#VALUE!
AC106873	0	NA	NA	NA	NA	#VALUE!
AC106874	0	NA	NA	NA	NA	#VALUE!
AC106876	0	NA	NA	NA	NA	#VALUE!
AC106883	0	NA	NA	NA	NA	#VALUE!
AC106901	0	NA	NA	NA	NA	#VALUE!
AC107083	0	NA	NA	NA	NA	#VALUE!
AC107399	0	NA	NA	NA	NA	#VALUE!
AC107982	0	NA	NA	NA	NA	#VALUE!
AC108004	0	NA	NA	NA	NA	#VALUE!
AC108025	0	NA	NA	NA	NA	#VALUE!
AC108056	0	NA	NA	NA	NA	#VALUE!
AC108059	0	NA	NA	NA	NA	#VALUE!
AC108066	0	NA	NA	NA	NA	#VALUE!
AC108462	0	NA	NA	NA	NA	#VALUE!
AC108868	0	NA	NA	NA	NA	#VALUE!
AC109589	0	NA	NA	NA	NA	#VALUE!
AC109638	0	NA	NA	NA	NA	#VALUE!
AC109642	0	NA	NA	NA	NA	#VALUE!
AC109815	0	NA	NA	NA	NA	#VALUE!
AC109826	0	NA	NA	NA	NA	#VALUE!
AC110299	0	NA	NA	NA	NA	#VALUE!
AC110620	0	NA	NA	NA	NA	#VALUE!
AC110754	0	NA	NA	NA	NA	#VALUE!
AC110769	0	NA	NA	NA	NA	#VALUE!
AC110781	0	NA	NA	NA	NA	#VALUE!
AC112198	0	NA	NA	NA	NA	#VALUE!
AC112220	0	NA	NA	NA	NA	#VALUE!
AC112229	0	NA	NA	NA	NA	#VALUE!
AC112518	0	NA	NA	NA	NA	#VALUE!
AC112715	0	NA	NA	NA	NA	#VALUE!
AC113167	0	NA	NA	NA	NA	#VALUE!
AC113331	0	NA	NA	NA	NA	#VALUE!
AC113607	0	NA	NA	NA	NA	#VALUE!
AC113608	0	NA	NA	NA	NA	#VALUE!
AC113610	0	NA	NA	NA	NA	#VALUE!
AC113617	0	NA	NA	NA	NA	#VALUE!
AC113618	0	NA	NA	NA	NA	#VALUE!
AC114737	0	NA	NA	NA	NA	#VALUE!
AC114752	0	NA	NA	NA	NA	#VALUE!
AC114760	0	NA	NA	NA	NA	#VALUE!
AC114763	0	NA	NA	NA	NA	#VALUE!
AC114783	0	NA	NA	NA	NA	#VALUE!
AC114812	0	NA	NA	NA	NA	#VALUE!
AC114813	0	NA	NA	NA	NA	#VALUE!
AC114814	0	NA	NA	NA	NA	#VALUE!
AC114877	0	NA	NA	NA	NA	#VALUE!
AC114973	0	NA	NA	NA	NA	#VALUE!
AC115115	0	NA	NA	NA	NA	#VALUE!
AC115283	0	NA	NA	NA	NA	#VALUE!
AC116609	0	NA	NA	NA	NA	#VALUE!
AC117490	0	NA	NA	NA	NA	#VALUE!
AC118345	0	NA	NA	NA	NA	#VALUE!
AC118653	0	NA	NA	NA	NA	#VALUE!
AC119403	0	NA	NA	NA	NA	#VALUE!
AC121251	0	NA	NA	NA	NA	#VALUE!
AC122136	0	NA	NA	NA	NA	#VALUE!
AC123023	0	NA	NA	NA	NA	#VALUE!
AC123886	0	NA	NA	NA	NA	#VALUE!
AC123900	0	NA	NA	NA	NA	#VALUE!
AC124057	0	NA	NA	NA	NA	#VALUE!
AC125421	0	NA	NA	NA	NA	#VALUE!
AC125634	0	NA	NA	NA	NA	#VALUE!
AC127383	0	NA	NA	NA	NA	#VALUE!
AC127391	0	NA	NA	NA	NA	#VALUE!
AC129778	0	NA	NA	NA	NA	#VALUE!
AC130360	0	NA	NA	NA	NA	#VALUE!
AC130464	0	NA	NA	NA	NA	#VALUE!
AC130469	0	NA	NA	NA	NA	#VALUE!
AC130689	0	NA	NA	NA	NA	#VALUE!
AC130709	0	NA	NA	NA	NA	#VALUE!
AC131097	0	NA	NA	NA	NA	#VALUE!
AC132008	0	NA	NA	NA	NA	#VALUE!
AC132217	0	NA	NA	NA	NA	#VALUE!
AC132479	0	NA	NA	NA	NA	#VALUE!
AC132807	0	NA	NA	NA	NA	#VALUE!
AC133104	0	NA	NA	NA	NA	#VALUE!
AC133106	0	NA	NA	NA	NA	#VALUE!
AC133141	0	NA	NA	NA	NA	#VALUE!
AC133633	0	NA	NA	NA	NA	#VALUE!
AC133644	0	NA	NA	NA	NA	#VALUE!
AC133965	0	NA	NA	NA	NA	#VALUE!
AC134915	0	NA	NA	NA	NA	#VALUE!
AC135178	0	NA	NA	NA	NA	#VALUE!
AC135999	0	NA	NA	NA	NA	#VALUE!
AC136896	0	NA	NA	NA	NA	#VALUE!
AC137527	0	NA	NA	NA	NA	#VALUE!
AC137675	0	NA	NA	NA	NA	#VALUE!
AC138430	0	NA	NA	NA	NA	#VALUE!
AC138472	0	NA	NA	NA	NA	#VALUE!
AC138647	0	NA	NA	NA	NA	#VALUE!
AC139085	0	NA	NA	NA	NA	#VALUE!
AC139143	0	NA	NA	NA	NA	#VALUE!
AC140481	0	NA	NA	NA	NA	#VALUE!
AC140725	0	NA	NA	NA	NA	#VALUE!
AC140912	0	NA	NA	NA	NA	#VALUE!
AC142119	0	NA	NA	NA	NA	#VALUE!
AC142293	0	NA	NA	NA	NA	#VALUE!
AC144525	0	NA	NA	NA	NA	#VALUE!
AC144833	0	NA	NA	NA	NA	#VALUE!
AC151960	0	NA	NA	NA	NA	#VALUE!
AC152010	0	NA	NA	NA	NA	#VALUE!
AC226119	0	NA	NA	NA	NA	#VALUE!
AC226150	0	NA	NA	NA	NA	#VALUE!
ACCSL	0	NA	NA	NA	NA	#VALUE!
ACE3P	0	NA	NA	NA	NA	#VALUE!
ACEA_U3	0	NA	NA	NA	NA	#VALUE!
ACER1	0	NA	NA	NA	NA	#VALUE!
ACKR1	0	NA	NA	NA	NA	#VALUE!
ACOD1	0	NA	NA	NA	NA	#VALUE!
ACOT12	0	NA	NA	NA	NA	#VALUE!
ACSM1	0	NA	NA	NA	NA	#VALUE!
ACSM2A	0	NA	NA	NA	NA	#VALUE!
ACSM5P1	0	NA	NA	NA	NA	#VALUE!
ACSM6	0	NA	NA	NA	NA	#VALUE!
ACTBP12	0	NA	NA	NA	NA	#VALUE!
ACTBP6	0	NA	NA	NA	NA	#VALUE!
ACTG1P11	0	NA	NA	NA	NA	#VALUE!
ACTG1P13	0	NA	NA	NA	NA	#VALUE!
ACTG1P2	0	NA	NA	NA	NA	#VALUE!
ACTG1P4	0	NA	NA	NA	NA	#VALUE!
ACTG2	0	NA	NA	NA	NA	#VALUE!
ACTL6B	0	NA	NA	NA	NA	#VALUE!
ACTL7A	0	NA	NA	NA	NA	#VALUE!
ACTL7B	0	NA	NA	NA	NA	#VALUE!
ACTL9	0	NA	NA	NA	NA	#VALUE!
ACTN4P2	0	NA	NA	NA	NA	#VALUE!
ACTP1	0	NA	NA	NA	NA	#VALUE!
ACTR3BP1	0	NA	NA	NA	NA	#VALUE!
ACTR3BP2	0	NA	NA	NA	NA	#VALUE!
ACTR3BP3	0	NA	NA	NA	NA	#VALUE!
ACTR3BP4	0	NA	NA	NA	NA	#VALUE!
ACTR3BP5	0	NA	NA	NA	NA	#VALUE!
ACTR3BP6	0	NA	NA	NA	NA	#VALUE!
ACTR6P1	0	NA	NA	NA	NA	#VALUE!
ACTRT1	0	NA	NA	NA	NA	#VALUE!
ACTRT2	0	NA	NA	NA	NA	#VALUE!
AD000091	0	NA	NA	NA	NA	#VALUE!
AD000671	0	NA	NA	NA	NA	#VALUE!
ADAD1P2	0	NA	NA	NA	NA	#VALUE!
ADAM2	0	NA	NA	NA	NA	#VALUE!
ADAM20P2	0	NA	NA	NA	NA	#VALUE!
ADAM24P	0	NA	NA	NA	NA	#VALUE!
ADAM30	0	NA	NA	NA	NA	#VALUE!
ADAM33	0	NA	NA	NA	NA	#VALUE!
ADAM3A	0	NA	NA	NA	NA	#VALUE!
ADAM3B	0	NA	NA	NA	NA	#VALUE!
ADAM5	0	NA	NA	NA	NA	#VALUE!
ADAM7	0	NA	NA	NA	NA	#VALUE!
ADAMDEC1	0	NA	NA	NA	NA	#VALUE!
ADAMTS9-AS1	0	NA	NA	NA	NA	#VALUE!
ADAMTSL2	0	NA	NA	NA	NA	#VALUE!
ADGB	0	NA	NA	NA	NA	#VALUE!
ADGRA1-AS1	0	NA	NA	NA	NA	#VALUE!
ADGRD2	0	NA	NA	NA	NA	#VALUE!
ADGRF2	0	NA	NA	NA	NA	#VALUE!
ADGRF5P2	0	NA	NA	NA	NA	#VALUE!
ADGRL3-AS1	0	NA	NA	NA	NA	#VALUE!
ADH1A	0	NA	NA	NA	NA	#VALUE!
ADH1B	0	NA	NA	NA	NA	#VALUE!
ADH4	0	NA	NA	NA	NA	#VALUE!
ADH7	0	NA	NA	NA	NA	#VALUE!
ADI1P2	0	NA	NA	NA	NA	#VALUE!
ADI1P3	0	NA	NA	NA	NA	#VALUE!
ADIG	0	NA	NA	NA	NA	#VALUE!
ADIPOQ	0	NA	NA	NA	NA	#VALUE!
ADIPOQ-AS1	0	NA	NA	NA	NA	#VALUE!
ADIRF	0	NA	NA	NA	NA	#VALUE!
ADORA2BP1	0	NA	NA	NA	NA	#VALUE!
ADRA1A	0	NA	NA	NA	NA	#VALUE!
ADRB3	0	NA	NA	NA	NA	#VALUE!
AE000659	0	NA	NA	NA	NA	#VALUE!
AE000660	0	NA	NA	NA	NA	#VALUE!
AF001550	0	NA	NA	NA	NA	#VALUE!
AF003529	0	NA	NA	NA	NA	#VALUE!
AF003625	0	NA	NA	NA	NA	#VALUE!
AF003626	0	NA	NA	NA	NA	#VALUE!
AF015720	0	NA	NA	NA	NA	#VALUE!
AF067845	0	NA	NA	NA	NA	#VALUE!
AF096876	0	NA	NA	NA	NA	#VALUE!
AF121897	0	NA	NA	NA	NA	#VALUE!
AF129408	0	NA	NA	NA	NA	#VALUE!
AF178030	0	NA	NA	NA	NA	#VALUE!
AF212831	0	NA	NA	NA	NA	#VALUE!
AF224669	0	NA	NA	NA	NA	#VALUE!
AF228730	0	NA	NA	NA	NA	#VALUE!
AF238378	0	NA	NA	NA	NA	#VALUE!
AF240627	0	NA	NA	NA	NA	#VALUE!
AF241726	0	NA	NA	NA	NA	#VALUE!
AF277315	0	NA	NA	NA	NA	#VALUE!
AFF2-IT1	0	NA	NA	NA	NA	#VALUE!
AFG3L2P1	0	NA	NA	NA	NA	#VALUE!
AGAP1-IT1	0	NA	NA	NA	NA	#VALUE!
AGAP13P	0	NA	NA	NA	NA	#VALUE!
AGAP9	0	NA	NA	NA	NA	#VALUE!
AGBL1	0	NA	NA	NA	NA	#VALUE!
AGBL1-AS1	0	NA	NA	NA	NA	#VALUE!
AGBL4-IT1	0	NA	NA	NA	NA	#VALUE!
AGGF1P3	0	NA	NA	NA	NA	#VALUE!
AGGF1P4	0	NA	NA	NA	NA	#VALUE!
AGGF1P5	0	NA	NA	NA	NA	#VALUE!
AGGF1P7	0	NA	NA	NA	NA	#VALUE!
AGGF1P9	0	NA	NA	NA	NA	#VALUE!
AGKP1	0	NA	NA	NA	NA	#VALUE!
AGPAT5P1	0	NA	NA	NA	NA	#VALUE!
AGR2	0	NA	NA	NA	NA	#VALUE!
AGR3	0	NA	NA	NA	NA	#VALUE!
AHCYP5	0	NA	NA	NA	NA	#VALUE!
AHCYP8	0	NA	NA	NA	NA	#VALUE!
AHSG	0	NA	NA	NA	NA	#VALUE!
AHSP	0	NA	NA	NA	NA	#VALUE!
AIF1	0	NA	NA	NA	NA	#VALUE!
AIFM1P1	0	NA	NA	NA	NA	#VALUE!
AIG1P1	0	NA	NA	NA	NA	#VALUE!
AIMP1P2	0	NA	NA	NA	NA	#VALUE!
AIPL1	0	NA	NA	NA	NA	#VALUE!
AIRE	0	NA	NA	NA	NA	#VALUE!
AIRN	0	NA	NA	NA	NA	#VALUE!
AJ006995	0	NA	NA	NA	NA	#VALUE!
AJ006998	0	NA	NA	NA	NA	#VALUE!
AJ009632	0	NA	NA	NA	NA	#VALUE!
AJ239321	0	NA	NA	NA	NA	#VALUE!
AJ239322	0	NA	NA	NA	NA	#VALUE!
AJ271736	0	NA	NA	NA	NA	#VALUE!
AK4P2	0	NA	NA	NA	NA	#VALUE!
AK4P5	0	NA	NA	NA	NA	#VALUE!
AK6P1	0	NA	NA	NA	NA	#VALUE!
AKAIN1	0	NA	NA	NA	NA	#VALUE!
AKAP4	0	NA	NA	NA	NA	#VALUE!
AKIRIN1P1	0	NA	NA	NA	NA	#VALUE!
AKIRIN1P2	0	NA	NA	NA	NA	#VALUE!
AKIRIN2P1	0	NA	NA	NA	NA	#VALUE!
AKR1B10P1	0	NA	NA	NA	NA	#VALUE!
AKR1B10P2	0	NA	NA	NA	NA	#VALUE!
AKR1B1P1	0	NA	NA	NA	NA	#VALUE!
AKR1B1P2	0	NA	NA	NA	NA	#VALUE!
AKR1B1P4	0	NA	NA	NA	NA	#VALUE!
AKR1B1P6	0	NA	NA	NA	NA	#VALUE!
AKR1B1P8	0	NA	NA	NA	NA	#VALUE!
AKR1C5P	0	NA	NA	NA	NA	#VALUE!
AKR1C6P	0	NA	NA	NA	NA	#VALUE!
AKR1D1P1	0	NA	NA	NA	NA	#VALUE!
AL021546	0	NA	NA	NA	NA	#VALUE!
AL022345	0	NA	NA	NA	NA	#VALUE!
AL031601	0	NA	NA	NA	NA	#VALUE!
AL049758	0	NA	NA	NA	NA	#VALUE!
AL050303	0	NA	NA	NA	NA	#VALUE!
AL109767	0	NA	NA	NA	NA	#VALUE!
AL121656	0	NA	NA	NA	NA	#VALUE!
AL121657	0	NA	NA	NA	NA	#VALUE!
AL122127	0	NA	NA	NA	NA	#VALUE!
AL132709	0	NA	NA	NA	NA	#VALUE!
AL132796	0	NA	NA	NA	NA	#VALUE!
AL133168	0	NA	NA	NA	NA	#VALUE!
AL133244	0	NA	NA	NA	NA	#VALUE!
AL133247	0	NA	NA	NA	NA	#VALUE!
AL133249	0	NA	NA	NA	NA	#VALUE!
AL138479	0	NA	NA	NA	NA	#VALUE!
AL157871	0	NA	NA	NA	NA	#VALUE!
AL157902	0	NA	NA	NA	NA	#VALUE!
AL161668	0	NA	NA	NA	NA	#VALUE!
AL162759	0	NA	NA	NA	NA	#VALUE!
AL353997	0	NA	NA	NA	NA	#VALUE!
AL356806	0	NA	NA	NA	NA	#VALUE!
AL450226	0	NA	NA	NA	NA	#VALUE!
AL589986	0	NA	NA	NA	NA	#VALUE!
AL591704	0	NA	NA	NA	NA	#VALUE!
AL592528	0	NA	NA	NA	NA	#VALUE!
AL772307	0	NA	NA	NA	NA	#VALUE!
AL773572	0	NA	NA	NA	NA	#VALUE!
AL928654	0	NA	NA	NA	NA	#VALUE!
AL928742	0	NA	NA	NA	NA	#VALUE!
AL928768	0	NA	NA	NA	NA	#VALUE!
ALDH1L1-AS1	0	NA	NA	NA	NA	#VALUE!
ALDH1L1-AS2	0	NA	NA	NA	NA	#VALUE!
ALDH3A1	0	NA	NA	NA	NA	#VALUE!
ALDH7A1P2	0	NA	NA	NA	NA	#VALUE!
ALDH7A1P3	0	NA	NA	NA	NA	#VALUE!
ALDH7A1P4	0	NA	NA	NA	NA	#VALUE!
ALG13-AS1	0	NA	NA	NA	NA	#VALUE!
ALG1L11P	0	NA	NA	NA	NA	#VALUE!
ALG1L14P	0	NA	NA	NA	NA	#VALUE!
ALG3P1	0	NA	NA	NA	NA	#VALUE!
ALG9-IT1	0	NA	NA	NA	NA	#VALUE!
ALOX12P1	0	NA	NA	NA	NA	#VALUE!
ALOX15	0	NA	NA	NA	NA	#VALUE!
ALOX15P2	0	NA	NA	NA	NA	#VALUE!
ALPI	0	NA	NA	NA	NA	#VALUE!
ALPPL2	0	NA	NA	NA	NA	#VALUE!
ALX3	0	NA	NA	NA	NA	#VALUE!
AMBN	0	NA	NA	NA	NA	#VALUE!
AMD1P1	0	NA	NA	NA	NA	#VALUE!
AMD1P2	0	NA	NA	NA	NA	#VALUE!
AMD1P4	0	NA	NA	NA	NA	#VALUE!
AMELX	0	NA	NA	NA	NA	#VALUE!
AMELY	0	NA	NA	NA	NA	#VALUE!
AMER2	0	NA	NA	NA	NA	#VALUE!
AMER3	0	NA	NA	NA	NA	#VALUE!
AMHR2	0	NA	NA	NA	NA	#VALUE!
AMIGO3	0	NA	NA	NA	NA	#VALUE!
AMMECR1-IT1	0	NA	NA	NA	NA	#VALUE!
AMMECR1LP1	0	NA	NA	NA	NA	#VALUE!
AMPD1	0	NA	NA	NA	NA	#VALUE!
AMY1A	0	NA	NA	NA	NA	#VALUE!
AMY1B	0	NA	NA	NA	NA	#VALUE!
AMY1C	0	NA	NA	NA	NA	#VALUE!
AMY2A	0	NA	NA	NA	NA	#VALUE!
AMYP1	0	NA	NA	NA	NA	#VALUE!
ANHX	0	NA	NA	NA	NA	#VALUE!
ANKRD20A17P	0	NA	NA	NA	NA	#VALUE!
ANKRD20A18P	0	NA	NA	NA	NA	#VALUE!
ANKRD20A2	0	NA	NA	NA	NA	#VALUE!
ANKRD20A8P	0	NA	NA	NA	NA	#VALUE!
ANKRD26P2	0	NA	NA	NA	NA	#VALUE!
ANKRD26P3	0	NA	NA	NA	NA	#VALUE!
ANKRD30BL	0	NA	NA	NA	NA	#VALUE!
ANKRD30BP1	0	NA	NA	NA	NA	#VALUE!
ANKRD30BP3	0	NA	NA	NA	NA	#VALUE!
ANKRD33	0	NA	NA	NA	NA	#VALUE!
ANKRD33B-AS1	0	NA	NA	NA	NA	#VALUE!
ANKRD34B	0	NA	NA	NA	NA	#VALUE!
ANKRD34C	0	NA	NA	NA	NA	#VALUE!
ANKRD34C-AS1	0	NA	NA	NA	NA	#VALUE!
ANKRD36BP1	0	NA	NA	NA	NA	#VALUE!
ANKRD36P1	0	NA	NA	NA	NA	#VALUE!
ANKRD44-IT1	0	NA	NA	NA	NA	#VALUE!
ANKRD54P1	0	NA	NA	NA	NA	#VALUE!
ANKRD62	0	NA	NA	NA	NA	#VALUE!
ANKRD62P1	0	NA	NA	NA	NA	#VALUE!
ANKRD62P1-PARP4P3	0	NA	NA	NA	NA	#VALUE!
ANKRD66	0	NA	NA	NA	NA	#VALUE!
ANKRD7	0	NA	NA	NA	NA	#VALUE!
ANKS4B	0	NA	NA	NA	NA	#VALUE!
ANO1-AS1	0	NA	NA	NA	NA	#VALUE!
ANOS2P	0	NA	NA	NA	NA	#VALUE!
ANP32BP2	0	NA	NA	NA	NA	#VALUE!
ANP32BP3	0	NA	NA	NA	NA	#VALUE!
AOAH-IT1	0	NA	NA	NA	NA	#VALUE!
AOC4P	0	NA	NA	NA	NA	#VALUE!
AOX2P	0	NA	NA	NA	NA	#VALUE!
AOX3P	0	NA	NA	NA	NA	#VALUE!
AP000146	0	NA	NA	NA	NA	#VALUE!
AP000235	0	NA	NA	NA	NA	#VALUE!
AP000244	0	NA	NA	NA	NA	#VALUE!
AP000255	0	NA	NA	NA	NA	#VALUE!
AP000275	0	NA	NA	NA	NA	#VALUE!
AP000282	0	NA	NA	NA	NA	#VALUE!
AP000290	0	NA	NA	NA	NA	#VALUE!
AP000295	0	NA	NA	NA	NA	#VALUE!
AP000302	0	NA	NA	NA	NA	#VALUE!
AP000304	0	NA	NA	NA	NA	#VALUE!
AP000344	0	NA	NA	NA	NA	#VALUE!
AP000345	0	NA	NA	NA	NA	#VALUE!
AP000349	0	NA	NA	NA	NA	#VALUE!
AP000351	0	NA	NA	NA	NA	#VALUE!
AP000355	0	NA	NA	NA	NA	#VALUE!
AP000356	0	NA	NA	NA	NA	#VALUE!
AP000358	0	NA	NA	NA	NA	#VALUE!
AP000361	0	NA	NA	NA	NA	#VALUE!
AP000362	0	NA	NA	NA	NA	#VALUE!
AP000402	0	NA	NA	NA	NA	#VALUE!
AP000403	0	NA	NA	NA	NA	#VALUE!
AP000431	0	NA	NA	NA	NA	#VALUE!
AP000432	0	NA	NA	NA	NA	#VALUE!
AP000435	0	NA	NA	NA	NA	#VALUE!
AP000445	0	NA	NA	NA	NA	#VALUE!
AP000459	0	NA	NA	NA	NA	#VALUE!
AP000469	0	NA	NA	NA	NA	#VALUE!
AP000479	0	NA	NA	NA	NA	#VALUE!
AP000563	0	NA	NA	NA	NA	#VALUE!
AP000567	0	NA	NA	NA	NA	#VALUE!
AP000580	0	NA	NA	NA	NA	#VALUE!
AP000641	0	NA	NA	NA	NA	#VALUE!
AP000647	0	NA	NA	NA	NA	#VALUE!
AP000648	0	NA	NA	NA	NA	#VALUE!
AP000679	0	NA	NA	NA	NA	#VALUE!
AP000696	0	NA	NA	NA	NA	#VALUE!
AP000697	0	NA	NA	NA	NA	#VALUE!
AP000721	0	NA	NA	NA	NA	#VALUE!
AP000769	0	NA	NA	NA	NA	#VALUE!
AP000770	0	NA	NA	NA	NA	#VALUE!
AP000855	0	NA	NA	NA	NA	#VALUE!
AP000857	0	NA	NA	NA	NA	#VALUE!
AP000859	0	NA	NA	NA	NA	#VALUE!
AP000860	0	NA	NA	NA	NA	#VALUE!
AP000867	0	NA	NA	NA	NA	#VALUE!
AP000889	0	NA	NA	NA	NA	#VALUE!
AP000946	0	NA	NA	NA	NA	#VALUE!
AP000998	0	NA	NA	NA	NA	#VALUE!
AP001042	0	NA	NA	NA	NA	#VALUE!
AP001043	0	NA	NA	NA	NA	#VALUE!
AP001046	0	NA	NA	NA	NA	#VALUE!
AP001048	0	NA	NA	NA	NA	#VALUE!
AP001059	0	NA	NA	NA	NA	#VALUE!
AP001063	0	NA	NA	NA	NA	#VALUE!
AP001092	0	NA	NA	NA	NA	#VALUE!
AP001136	0	NA	NA	NA	NA	#VALUE!
AP001171	0	NA	NA	NA	NA	#VALUE!
AP001172	0	NA	NA	NA	NA	#VALUE!
AP001189	0	NA	NA	NA	NA	#VALUE!
AP001331	0	NA	NA	NA	NA	#VALUE!
AP001342	0	NA	NA	NA	NA	#VALUE!
AP001434	0	NA	NA	NA	NA	#VALUE!
AP001464	0	NA	NA	NA	NA	#VALUE!
AP001465	0	NA	NA	NA	NA	#VALUE!
AP001468	0	NA	NA	NA	NA	#VALUE!
AP001476	0	NA	NA	NA	NA	#VALUE!
AP001595	0	NA	NA	NA	NA	#VALUE!
AP001605	0	NA	NA	NA	NA	#VALUE!
AP001607	0	NA	NA	NA	NA	#VALUE!
AP001610	0	NA	NA	NA	NA	#VALUE!
AP001615	0	NA	NA	NA	NA	#VALUE!
AP001630	0	NA	NA	NA	NA	#VALUE!
AP001891	0	NA	NA	NA	NA	#VALUE!
AP002414	0	NA	NA	NA	NA	#VALUE!
AP002884	0	NA	NA	NA	NA	#VALUE!
AP003025	0	NA	NA	NA	NA	#VALUE!
AP003385	0	NA	NA	NA	NA	#VALUE!
AP003419	0	NA	NA	NA	NA	#VALUE!
AP004289	0	NA	NA	NA	NA	#VALUE!
AP004550	0	NA	NA	NA	NA	#VALUE!
AP005135	0	NA	NA	NA	NA	#VALUE!
AP005273	0	NA	NA	NA	NA	#VALUE!
AP005530	0	NA	NA	NA	NA	#VALUE!
AP005901	0	NA	NA	NA	NA	#VALUE!
AP006285	0	NA	NA	NA	NA	#VALUE!
AP006288	0	NA	NA	NA	NA	#VALUE!
AP006294	0	NA	NA	NA	NA	#VALUE!
AP006748	0	NA	NA	NA	NA	#VALUE!
AP1B1P1	0	NA	NA	NA	NA	#VALUE!
AP1B1P2	0	NA	NA	NA	NA	#VALUE!
AP1S2P1	0	NA	NA	NA	NA	#VALUE!
APCDD1	0	NA	NA	NA	NA	#VALUE!
APCDD1L	0	NA	NA	NA	NA	#VALUE!
APELA	0	NA	NA	NA	NA	#VALUE!
APITD1-CORT	0	NA	NA	NA	NA	#VALUE!
APLNR	0	NA	NA	NA	NA	#VALUE!
APOA1	0	NA	NA	NA	NA	#VALUE!
APOA1-AS	0	NA	NA	NA	NA	#VALUE!
APOA2	0	NA	NA	NA	NA	#VALUE!
APOA4	0	NA	NA	NA	NA	#VALUE!
APOBEC1	0	NA	NA	NA	NA	#VALUE!
APOBEC3A	0	NA	NA	NA	NA	#VALUE!
APOBEC3AP1	0	NA	NA	NA	NA	#VALUE!
APOBEC3B-AS1	0	NA	NA	NA	NA	#VALUE!
APOBEC4	0	NA	NA	NA	NA	#VALUE!
APOC1P1	0	NA	NA	NA	NA	#VALUE!
APOC2	0	NA	NA	NA	NA	#VALUE!
APOC3	0	NA	NA	NA	NA	#VALUE!
APOC4	0	NA	NA	NA	NA	#VALUE!
APOC4-APOC2	0	NA	NA	NA	NA	#VALUE!
APOH	0	NA	NA	NA	NA	#VALUE!
APOL4	0	NA	NA	NA	NA	#VALUE!
APOL5	0	NA	NA	NA	NA	#VALUE!
APOOP1	0	NA	NA	NA	NA	#VALUE!
APOOP3	0	NA	NA	NA	NA	#VALUE!
APOOP4	0	NA	NA	NA	NA	#VALUE!
APOOP5	0	NA	NA	NA	NA	#VALUE!
AQP10	0	NA	NA	NA	NA	#VALUE!
AQP12A	0	NA	NA	NA	NA	#VALUE!
AQP12B	0	NA	NA	NA	NA	#VALUE!
AQP4	0	NA	NA	NA	NA	#VALUE!
AQP4-AS1	0	NA	NA	NA	NA	#VALUE!
AQP8	0	NA	NA	NA	NA	#VALUE!
ARAFP1	0	NA	NA	NA	NA	#VALUE!
ARAFP2	0	NA	NA	NA	NA	#VALUE!
ARAFP3	0	NA	NA	NA	NA	#VALUE!
ARF1P1	0	NA	NA	NA	NA	#VALUE!
ARF1P3	0	NA	NA	NA	NA	#VALUE!
ARF4P4	0	NA	NA	NA	NA	#VALUE!
ARGFX	0	NA	NA	NA	NA	#VALUE!
ARGFXP1	0	NA	NA	NA	NA	#VALUE!
ARHGAP22-IT1	0	NA	NA	NA	NA	#VALUE!
ARHGAP26-IT1	0	NA	NA	NA	NA	#VALUE!
ARHGAP36	0	NA	NA	NA	NA	#VALUE!
ARHGAP42P2	0	NA	NA	NA	NA	#VALUE!
ARHGAP42P3	0	NA	NA	NA	NA	#VALUE!
ARHGAP42P4	0	NA	NA	NA	NA	#VALUE!
ARHGAP8	0	NA	NA	NA	NA	#VALUE!
ARHGEF19-AS1	0	NA	NA	NA	NA	#VALUE!
ARHGEF3-AS1	0	NA	NA	NA	NA	#VALUE!
ARHGEF38-IT1	0	NA	NA	NA	NA	#VALUE!
ARHGEF7-AS1	0	NA	NA	NA	NA	#VALUE!
ARHGEF7-AS2	0	NA	NA	NA	NA	#VALUE!
ARHGEF9-IT1	0	NA	NA	NA	NA	#VALUE!
ARL11	0	NA	NA	NA	NA	#VALUE!
ARL2BPP1	0	NA	NA	NA	NA	#VALUE!
ARL2BPP10	0	NA	NA	NA	NA	#VALUE!
ARL2BPP2	0	NA	NA	NA	NA	#VALUE!
ARL2BPP3	0	NA	NA	NA	NA	#VALUE!
ARL2BPP4	0	NA	NA	NA	NA	#VALUE!
ARL2BPP5	0	NA	NA	NA	NA	#VALUE!
ARL2BPP6	0	NA	NA	NA	NA	#VALUE!
ARL2BPP7	0	NA	NA	NA	NA	#VALUE!
ARL2BPP8	0	NA	NA	NA	NA	#VALUE!
ARL4AP1	0	NA	NA	NA	NA	#VALUE!
ARL4AP2	0	NA	NA	NA	NA	#VALUE!
ARL5AP1	0	NA	NA	NA	NA	#VALUE!
ARL5AP2	0	NA	NA	NA	NA	#VALUE!
ARL5AP3	0	NA	NA	NA	NA	#VALUE!
ARL5AP4	0	NA	NA	NA	NA	#VALUE!
ARMC2-AS1	0	NA	NA	NA	NA	#VALUE!
ARMC3	0	NA	NA	NA	NA	#VALUE!
ARMC8P1	0	NA	NA	NA	NA	#VALUE!
ARMCX3-AS1	0	NA	NA	NA	NA	#VALUE!
ARMCX7P	0	NA	NA	NA	NA	#VALUE!
ARNTL2-AS1	0	NA	NA	NA	NA	#VALUE!
ARPC4-TTLL3	0	NA	NA	NA	NA	#VALUE!
ARPP21-AS1	0	NA	NA	NA	NA	#VALUE!
ARSD-AS1	0	NA	NA	NA	NA	#VALUE!
ARSDP1	0	NA	NA	NA	NA	#VALUE!
ARSEP1	0	NA	NA	NA	NA	#VALUE!
ARSF	0	NA	NA	NA	NA	#VALUE!
ARSFP1	0	NA	NA	NA	NA	#VALUE!
ARSH	0	NA	NA	NA	NA	#VALUE!
ART1	0	NA	NA	NA	NA	#VALUE!
ART2BP	0	NA	NA	NA	NA	#VALUE!
AS3MT	0	NA	NA	NA	NA	#VALUE!
ASB10	0	NA	NA	NA	NA	#VALUE!
ASB12	0	NA	NA	NA	NA	#VALUE!
ASB17	0	NA	NA	NA	NA	#VALUE!
ASB5	0	NA	NA	NA	NA	#VALUE!
ASCL2	0	NA	NA	NA	NA	#VALUE!
ASCL4	0	NA	NA	NA	NA	#VALUE!
ASH1L-IT1	0	NA	NA	NA	NA	#VALUE!
ASH2LP1	0	NA	NA	NA	NA	#VALUE!
ASNSP3	0	NA	NA	NA	NA	#VALUE!
ASNSP6	0	NA	NA	NA	NA	#VALUE!
ASPN	0	NA	NA	NA	NA	#VALUE!
ASS1P10	0	NA	NA	NA	NA	#VALUE!
ASS1P4	0	NA	NA	NA	NA	#VALUE!
ASS1P6	0	NA	NA	NA	NA	#VALUE!
ASS1P9	0	NA	NA	NA	NA	#VALUE!
ASTL	0	NA	NA	NA	NA	#VALUE!
ASTN2-AS1	0	NA	NA	NA	NA	#VALUE!
ASXL3	0	NA	NA	NA	NA	#VALUE!
ASZ1	0	NA	NA	NA	NA	#VALUE!
ATF4P1	0	NA	NA	NA	NA	#VALUE!
ATG10-AS1	0	NA	NA	NA	NA	#VALUE!
ATG10-IT1	0	NA	NA	NA	NA	#VALUE!
ATG12P2	0	NA	NA	NA	NA	#VALUE!
ATG3P1	0	NA	NA	NA	NA	#VALUE!
ATG4AP1	0	NA	NA	NA	NA	#VALUE!
ATOH1	0	NA	NA	NA	NA	#VALUE!
ATP11A-AS1	0	NA	NA	NA	NA	#VALUE!
ATP11AUN	0	NA	NA	NA	NA	#VALUE!
ATP13A4-AS1	0	NA	NA	NA	NA	#VALUE!
ATP1B4	0	NA	NA	NA	NA	#VALUE!
ATP2B2-IT1	0	NA	NA	NA	NA	#VALUE!
ATP2B2-IT2	0	NA	NA	NA	NA	#VALUE!
ATP5A1P4	0	NA	NA	NA	NA	#VALUE!
ATP5A1P5	0	NA	NA	NA	NA	#VALUE!
ATP5A1P7	0	NA	NA	NA	NA	#VALUE!
ATP5BP1	0	NA	NA	NA	NA	#VALUE!
ATP5EP1	0	NA	NA	NA	NA	#VALUE!
ATP5F1P2	0	NA	NA	NA	NA	#VALUE!
ATP5F1P4	0	NA	NA	NA	NA	#VALUE!
ATP5G1P1	0	NA	NA	NA	NA	#VALUE!
ATP5G1P5	0	NA	NA	NA	NA	#VALUE!
ATP5G1P6	0	NA	NA	NA	NA	#VALUE!
ATP5G1P7	0	NA	NA	NA	NA	#VALUE!
ATP5G1P8	0	NA	NA	NA	NA	#VALUE!
ATP5G2P3	0	NA	NA	NA	NA	#VALUE!
ATP5HP1	0	NA	NA	NA	NA	#VALUE!
ATP5HP3	0	NA	NA	NA	NA	#VALUE!
ATP5J2-PTCD1	0	NA	NA	NA	NA	#VALUE!
ATP5J2LP	0	NA	NA	NA	NA	#VALUE!
ATP5J2P6	0	NA	NA	NA	NA	#VALUE!
ATP5LP4	0	NA	NA	NA	NA	#VALUE!
ATP5LP5	0	NA	NA	NA	NA	#VALUE!
ATP5LP7	0	NA	NA	NA	NA	#VALUE!
ATP6V0CP1	0	NA	NA	NA	NA	#VALUE!
ATP6V0CP2	0	NA	NA	NA	NA	#VALUE!
ATP6V0CP3	0	NA	NA	NA	NA	#VALUE!
ATP6V0E1P1	0	NA	NA	NA	NA	#VALUE!
ATP6V0E1P3	0	NA	NA	NA	NA	#VALUE!
ATP6V0E1P4	0	NA	NA	NA	NA	#VALUE!
ATP6V1G1P2	0	NA	NA	NA	NA	#VALUE!
ATP6V1G1P3	0	NA	NA	NA	NA	#VALUE!
ATP6V1G1P6	0	NA	NA	NA	NA	#VALUE!
ATP6V1G1P7	0	NA	NA	NA	NA	#VALUE!
ATP6V1G2-DDX39B	0	NA	NA	NA	NA	#VALUE!
ATP8A2P1	0	NA	NA	NA	NA	#VALUE!
ATXN8OS	0	NA	NA	NA	NA	#VALUE!
AVP	0	NA	NA	NA	NA	#VALUE!
AVPR1A	0	NA	NA	NA	NA	#VALUE!
AVPR1B	0	NA	NA	NA	NA	#VALUE!
AWAT2	0	NA	NA	NA	NA	#VALUE!
AY269186	0	NA	NA	NA	NA	#VALUE!
AZGP1P1	0	NA	NA	NA	NA	#VALUE!
AZGP1P2	0	NA	NA	NA	NA	#VALUE!
AZU1P1	0	NA	NA	NA	NA	#VALUE!
B3GALNT1	0	NA	NA	NA	NA	#VALUE!
B3GALNT1P1	0	NA	NA	NA	NA	#VALUE!
B3GALNT2P1	0	NA	NA	NA	NA	#VALUE!
B3GNT2P1	0	NA	NA	NA	NA	#VALUE!
B3GNT3	0	NA	NA	NA	NA	#VALUE!
B3GNTL1P1	0	NA	NA	NA	NA	#VALUE!
B3GNTL1P2	0	NA	NA	NA	NA	#VALUE!
B4GALNT2P1	0	NA	NA	NA	NA	#VALUE!
BAATP1	0	NA	NA	NA	NA	#VALUE!
BACE2-IT1	0	NA	NA	NA	NA	#VALUE!
BACH1-IT3	0	NA	NA	NA	NA	#VALUE!
BAK1P2	0	NA	NA	NA	NA	#VALUE!
BANF1P5	0	NA	NA	NA	NA	#VALUE!
BANF2	0	NA	NA	NA	NA	#VALUE!
BASP1P1	0	NA	NA	NA	NA	#VALUE!
BATF	0	NA	NA	NA	NA	#VALUE!
BCAR1P1	0	NA	NA	NA	NA	#VALUE!
BCAR1P2	0	NA	NA	NA	NA	#VALUE!
BCAS2P1	0	NA	NA	NA	NA	#VALUE!
BCAS2P3	0	NA	NA	NA	NA	#VALUE!
BCL9P1	0	NA	NA	NA	NA	#VALUE!
BCORP1	0	NA	NA	NA	NA	#VALUE!
BCRP1	0	NA	NA	NA	NA	#VALUE!
BCRP2	0	NA	NA	NA	NA	#VALUE!
BCRP4	0	NA	NA	NA	NA	#VALUE!
BCRP6	0	NA	NA	NA	NA	#VALUE!
BCRP7	0	NA	NA	NA	NA	#VALUE!
BDH2P1	0	NA	NA	NA	NA	#VALUE!
BDKRB1	0	NA	NA	NA	NA	#VALUE!
BDP1P	0	NA	NA	NA	NA	#VALUE!
BEAN1-AS1	0	NA	NA	NA	NA	#VALUE!
BECN1P2	0	NA	NA	NA	NA	#VALUE!
BEND2	0	NA	NA	NA	NA	#VALUE!
BEND3P2	0	NA	NA	NA	NA	#VALUE!
BEND7P1	0	NA	NA	NA	NA	#VALUE!
BET1P1	0	NA	NA	NA	NA	#VALUE!
BEX1	0	NA	NA	NA	NA	#VALUE!
BFSP2	0	NA	NA	NA	NA	#VALUE!
BFSP2-AS1	0	NA	NA	NA	NA	#VALUE!
BGLT3	0	NA	NA	NA	NA	#VALUE!
BHLHB9P1	0	NA	NA	NA	NA	#VALUE!
BHLHE22	0	NA	NA	NA	NA	#VALUE!
BHLHE23	0	NA	NA	NA	NA	#VALUE!
BICD1P1	0	NA	NA	NA	NA	#VALUE!
BIN2P1	0	NA	NA	NA	NA	#VALUE!
BIN2P2	0	NA	NA	NA	NA	#VALUE!
BIRC6-AS1	0	NA	NA	NA	NA	#VALUE!
BIRC8	0	NA	NA	NA	NA	#VALUE!
BIVM-ERCC5	0	NA	NA	NA	NA	#VALUE!
BLACE	0	NA	NA	NA	NA	#VALUE!
BLOC1S2P1	0	NA	NA	NA	NA	#VALUE!
BLOC1S5-TXNDC5	0	NA	NA	NA	NA	#VALUE!
BMI1P1	0	NA	NA	NA	NA	#VALUE!
BMP15	0	NA	NA	NA	NA	#VALUE!
BMP2KL	0	NA	NA	NA	NA	#VALUE!
BMP3	0	NA	NA	NA	NA	#VALUE!
BMP5	0	NA	NA	NA	NA	#VALUE!
BMP6P1	0	NA	NA	NA	NA	#VALUE!
BMP7-AS1	0	NA	NA	NA	NA	#VALUE!
BMPR1APS2	0	NA	NA	NA	NA	#VALUE!
BMPR1B-AS1	0	NA	NA	NA	NA	#VALUE!
BMS1P12	0	NA	NA	NA	NA	#VALUE!
BMS1P19	0	NA	NA	NA	NA	#VALUE!
BMS1P2	0	NA	NA	NA	NA	#VALUE!
BMS1P3	0	NA	NA	NA	NA	#VALUE!
BNIP3P13	0	NA	NA	NA	NA	#VALUE!
BNIP3P15	0	NA	NA	NA	NA	#VALUE!
BNIP3P18	0	NA	NA	NA	NA	#VALUE!
BNIP3P19	0	NA	NA	NA	NA	#VALUE!
BNIP3P2	0	NA	NA	NA	NA	#VALUE!
BNIP3P20	0	NA	NA	NA	NA	#VALUE!
BNIP3P22	0	NA	NA	NA	NA	#VALUE!
BNIP3P23	0	NA	NA	NA	NA	#VALUE!
BNIP3P3	0	NA	NA	NA	NA	#VALUE!
BNIP3P31	0	NA	NA	NA	NA	#VALUE!
BNIP3P32	0	NA	NA	NA	NA	#VALUE!
BNIP3P33	0	NA	NA	NA	NA	#VALUE!
BNIP3P34	0	NA	NA	NA	NA	#VALUE!
BNIP3P35	0	NA	NA	NA	NA	#VALUE!
BNIP3P36	0	NA	NA	NA	NA	#VALUE!
BNIP3P38	0	NA	NA	NA	NA	#VALUE!
BNIP3P40	0	NA	NA	NA	NA	#VALUE!
BNIP3P41	0	NA	NA	NA	NA	#VALUE!
BNIP3P42	0	NA	NA	NA	NA	#VALUE!
BNIP3P6	0	NA	NA	NA	NA	#VALUE!
BNIP3P7	0	NA	NA	NA	NA	#VALUE!
BNIP3P8	0	NA	NA	NA	NA	#VALUE!
BNIP3P9	0	NA	NA	NA	NA	#VALUE!
BOD1P1	0	NA	NA	NA	NA	#VALUE!
BOLA2	0	NA	NA	NA	NA	#VALUE!
BOLA2P1	0	NA	NA	NA	NA	#VALUE!
BOLA2P3	0	NA	NA	NA	NA	#VALUE!
BOLA3P1	0	NA	NA	NA	NA	#VALUE!
BOLA3P3	0	NA	NA	NA	NA	#VALUE!
BOLL	0	NA	NA	NA	NA	#VALUE!
BORCS7-ASMT	0	NA	NA	NA	NA	#VALUE!
BPESC1	0	NA	NA	NA	NA	#VALUE!
BPIFA1	0	NA	NA	NA	NA	#VALUE!
BPIFA2	0	NA	NA	NA	NA	#VALUE!
BPIFA3	0	NA	NA	NA	NA	#VALUE!
BPIFA4P	0	NA	NA	NA	NA	#VALUE!
BPIFB2	0	NA	NA	NA	NA	#VALUE!
BPIFB3	0	NA	NA	NA	NA	#VALUE!
BPIFB4	0	NA	NA	NA	NA	#VALUE!
BPIFB5P	0	NA	NA	NA	NA	#VALUE!
BPIFB6	0	NA	NA	NA	NA	#VALUE!
BPIFB9P	0	NA	NA	NA	NA	#VALUE!
BPIFC	0	NA	NA	NA	NA	#VALUE!
BPY2	0	NA	NA	NA	NA	#VALUE!
BPY2B	0	NA	NA	NA	NA	#VALUE!
BPY2C	0	NA	NA	NA	NA	#VALUE!
BPY2DP	0	NA	NA	NA	NA	#VALUE!
BRD7P1	0	NA	NA	NA	NA	#VALUE!
BRD7P6	0	NA	NA	NA	NA	#VALUE!
BRD9P1	0	NA	NA	NA	NA	#VALUE!
BRI3BPP1	0	NA	NA	NA	NA	#VALUE!
BRK1P2	0	NA	NA	NA	NA	#VALUE!
BRWD1P1	0	NA	NA	NA	NA	#VALUE!
BRWD1P2	0	NA	NA	NA	NA	#VALUE!
BRWD1P3	0	NA	NA	NA	NA	#VALUE!
BSN-AS1	0	NA	NA	NA	NA	#VALUE!
BSNDP4	0	NA	NA	NA	NA	#VALUE!
BSPH1	0	NA	NA	NA	NA	#VALUE!
BSPRY	0	NA	NA	NA	NA	#VALUE!
BSX	0	NA	NA	NA	NA	#VALUE!
BTBD17	0	NA	NA	NA	NA	#VALUE!
BTBD6P1	0	NA	NA	NA	NA	#VALUE!
BTBD7P1	0	NA	NA	NA	NA	#VALUE!
BTBD7P2	0	NA	NA	NA	NA	#VALUE!
BTBD9-AS1	0	NA	NA	NA	NA	#VALUE!
BTF3L4P4	0	NA	NA	NA	NA	#VALUE!
BTF3P15	0	NA	NA	NA	NA	#VALUE!
BTG3P1	0	NA	NA	NA	NA	#VALUE!
BTG4P1	0	NA	NA	NA	NA	#VALUE!
BUB1B-PAK6	0	NA	NA	NA	NA	#VALUE!
BUB1P1	0	NA	NA	NA	NA	#VALUE!
BUD31P1	0	NA	NA	NA	NA	#VALUE!
BX322559	0	NA	NA	NA	NA	#VALUE!
C10orf105	0	NA	NA	NA	NA	#VALUE!
C10orf107	0	NA	NA	NA	NA	#VALUE!
C10orf113	0	NA	NA	NA	NA	#VALUE!
C10orf120	0	NA	NA	NA	NA	#VALUE!
C10orf126	0	NA	NA	NA	NA	#VALUE!
C10orf128	0	NA	NA	NA	NA	#VALUE!
C10orf67	0	NA	NA	NA	NA	#VALUE!
C10orf71-AS1	0	NA	NA	NA	NA	#VALUE!
C10orf82	0	NA	NA	NA	NA	#VALUE!
C10orf99	0	NA	NA	NA	NA	#VALUE!
C11orf40	0	NA	NA	NA	NA	#VALUE!
C11orf52	0	NA	NA	NA	NA	#VALUE!
C11orf53	0	NA	NA	NA	NA	#VALUE!
C11orf88	0	NA	NA	NA	NA	#VALUE!
C11orf97	0	NA	NA	NA	NA	#VALUE!
C11orf98P1	0	NA	NA	NA	NA	#VALUE!
C12orf40	0	NA	NA	NA	NA	#VALUE!
C12orf42	0	NA	NA	NA	NA	#VALUE!
C12orf54	0	NA	NA	NA	NA	#VALUE!
C12orf74	0	NA	NA	NA	NA	#VALUE!
C12orf77	0	NA	NA	NA	NA	#VALUE!
C14orf105	0	NA	NA	NA	NA	#VALUE!
C14orf177	0	NA	NA	NA	NA	#VALUE!
C14orf178	0	NA	NA	NA	NA	#VALUE!
C14orf180	0	NA	NA	NA	NA	#VALUE!
C15orf32	0	NA	NA	NA	NA	#VALUE!
C15orf38-AP3S2	0	NA	NA	NA	NA	#VALUE!
C15orf53	0	NA	NA	NA	NA	#VALUE!
C15orf59-AS1	0	NA	NA	NA	NA	#VALUE!
C16orf78	0	NA	NA	NA	NA	#VALUE!
C16orf82	0	NA	NA	NA	NA	#VALUE!
C16orf92	0	NA	NA	NA	NA	#VALUE!
C16orf97	0	NA	NA	NA	NA	#VALUE!
C17orf100	0	NA	NA	NA	NA	#VALUE!
C17orf47	0	NA	NA	NA	NA	#VALUE!
C17orf64	0	NA	NA	NA	NA	#VALUE!
C17orf77	0	NA	NA	NA	NA	#VALUE!
C19orf84	0	NA	NA	NA	NA	#VALUE!
C1DP1	0	NA	NA	NA	NA	#VALUE!
C1DP3	0	NA	NA	NA	NA	#VALUE!
C1DP4	0	NA	NA	NA	NA	#VALUE!
C1DP5	0	NA	NA	NA	NA	#VALUE!
C1GALT1P3	0	NA	NA	NA	NA	#VALUE!
C1orf105	0	NA	NA	NA	NA	#VALUE!
C1orf127	0	NA	NA	NA	NA	#VALUE!
C1orf137	0	NA	NA	NA	NA	#VALUE!
C1orf141	0	NA	NA	NA	NA	#VALUE!
C1orf68	0	NA	NA	NA	NA	#VALUE!
C1orf87	0	NA	NA	NA	NA	#VALUE!
C1QA	0	NA	NA	NA	NA	#VALUE!
C1QB	0	NA	NA	NA	NA	#VALUE!
C1QBPP1	0	NA	NA	NA	NA	#VALUE!
C1QC	0	NA	NA	NA	NA	#VALUE!
C1QL1P1	0	NA	NA	NA	NA	#VALUE!
C1QL2	0	NA	NA	NA	NA	#VALUE!
C1QTNF5	0	NA	NA	NA	NA	#VALUE!
C1QTNF7	0	NA	NA	NA	NA	#VALUE!
C1QTNF8	0	NA	NA	NA	NA	#VALUE!
C1QTNF9-AS1	0	NA	NA	NA	NA	#VALUE!
C20orf173	0	NA	NA	NA	NA	#VALUE!
C20orf187	0	NA	NA	NA	NA	#VALUE!
C20orf78	0	NA	NA	NA	NA	#VALUE!
C20orf85	0	NA	NA	NA	NA	#VALUE!
C21orf91-OT1	0	NA	NA	NA	NA	#VALUE!
C22orf31	0	NA	NA	NA	NA	#VALUE!
C2CD4B	0	NA	NA	NA	NA	#VALUE!
C2orf27AP2	0	NA	NA	NA	NA	#VALUE!
C2orf27B	0	NA	NA	NA	NA	#VALUE!
C2orf57	0	NA	NA	NA	NA	#VALUE!
C2orf69P3	0	NA	NA	NA	NA	#VALUE!
C2orf69P4	0	NA	NA	NA	NA	#VALUE!
C2orf74	0	NA	NA	NA	NA	#VALUE!
C2orf78	0	NA	NA	NA	NA	#VALUE!
C2orf83	0	NA	NA	NA	NA	#VALUE!
C2orf91	0	NA	NA	NA	NA	#VALUE!
C3orf22	0	NA	NA	NA	NA	#VALUE!
C3orf30	0	NA	NA	NA	NA	#VALUE!
C3orf56	0	NA	NA	NA	NA	#VALUE!
C3orf67-AS1	0	NA	NA	NA	NA	#VALUE!
C3orf79	0	NA	NA	NA	NA	#VALUE!
C3orf84	0	NA	NA	NA	NA	#VALUE!
C3P1	0	NA	NA	NA	NA	#VALUE!
C4A-AS1	0	NA	NA	NA	NA	#VALUE!
C4B-AS1	0	NA	NA	NA	NA	#VALUE!
C4BPA	0	NA	NA	NA	NA	#VALUE!
C4BPB	0	NA	NA	NA	NA	#VALUE!
C4orf17	0	NA	NA	NA	NA	#VALUE!
C4orf22	0	NA	NA	NA	NA	#VALUE!
C4orf45	0	NA	NA	NA	NA	#VALUE!
C5orf38	0	NA	NA	NA	NA	#VALUE!
C5orf49	0	NA	NA	NA	NA	#VALUE!
C5orf52	0	NA	NA	NA	NA	#VALUE!
C5orf64	0	NA	NA	NA	NA	#VALUE!
C5orf66-AS1	0	NA	NA	NA	NA	#VALUE!
C5orf66-AS2	0	NA	NA	NA	NA	#VALUE!
C5orf67	0	NA	NA	NA	NA	#VALUE!
C6orf118	0	NA	NA	NA	NA	#VALUE!
C6orf222	0	NA	NA	NA	NA	#VALUE!
C6orf229	0	NA	NA	NA	NA	#VALUE!
C6orf47-AS1	0	NA	NA	NA	NA	#VALUE!
C7orf33	0	NA	NA	NA	NA	#VALUE!
C7orf55-LUC7L2	0	NA	NA	NA	NA	#VALUE!
C7orf62	0	NA	NA	NA	NA	#VALUE!
C7orf65	0	NA	NA	NA	NA	#VALUE!
C7orf66	0	NA	NA	NA	NA	#VALUE!
C7orf69	0	NA	NA	NA	NA	#VALUE!
C7orf71	0	NA	NA	NA	NA	#VALUE!
C7orf72	0	NA	NA	NA	NA	#VALUE!
C8A	0	NA	NA	NA	NA	#VALUE!
C8B	0	NA	NA	NA	NA	#VALUE!
C8orf17	0	NA	NA	NA	NA	#VALUE!
C8orf34-AS1	0	NA	NA	NA	NA	#VALUE!
C8orf59P2	0	NA	NA	NA	NA	#VALUE!
C8orf74	0	NA	NA	NA	NA	#VALUE!
C8orf86	0	NA	NA	NA	NA	#VALUE!
C9	0	NA	NA	NA	NA	#VALUE!
C9orf106	0	NA	NA	NA	NA	#VALUE!
C9orf129	0	NA	NA	NA	NA	#VALUE!
C9orf131	0	NA	NA	NA	NA	#VALUE!
C9orf135	0	NA	NA	NA	NA	#VALUE!
C9orf135-AS1	0	NA	NA	NA	NA	#VALUE!
C9orf139	0	NA	NA	NA	NA	#VALUE!
C9orf62	0	NA	NA	NA	NA	#VALUE!
CA5A	0	NA	NA	NA	NA	#VALUE!
CA5AP1	0	NA	NA	NA	NA	#VALUE!
CABP2	0	NA	NA	NA	NA	#VALUE!
CABP4	0	NA	NA	NA	NA	#VALUE!
CABS1	0	NA	NA	NA	NA	#VALUE!
CACNA1C-AS3	0	NA	NA	NA	NA	#VALUE!
CACNA1C-AS4	0	NA	NA	NA	NA	#VALUE!
CACNA1C-IT1	0	NA	NA	NA	NA	#VALUE!
CACNA1C-IT2	0	NA	NA	NA	NA	#VALUE!
CACNA1C-IT3	0	NA	NA	NA	NA	#VALUE!
CACNA1F	0	NA	NA	NA	NA	#VALUE!
CACNA1S	0	NA	NA	NA	NA	#VALUE!
CACNA2D3-AS1	0	NA	NA	NA	NA	#VALUE!
CACNG2	0	NA	NA	NA	NA	#VALUE!
CACNG3	0	NA	NA	NA	NA	#VALUE!
CACNG4	0	NA	NA	NA	NA	#VALUE!
CACNG5	0	NA	NA	NA	NA	#VALUE!
CACYBPP3	0	NA	NA	NA	NA	#VALUE!
CADM2-AS1	0	NA	NA	NA	NA	#VALUE!
CADM2-AS2	0	NA	NA	NA	NA	#VALUE!
CADM3-AS1	0	NA	NA	NA	NA	#VALUE!
CALCP	0	NA	NA	NA	NA	#VALUE!
CALM1P2	0	NA	NA	NA	NA	#VALUE!
CALM2P1	0	NA	NA	NA	NA	#VALUE!
CALML3	0	NA	NA	NA	NA	#VALUE!
CALML5	0	NA	NA	NA	NA	#VALUE!
CALN1	0	NA	NA	NA	NA	#VALUE!
CAMK1G	0	NA	NA	NA	NA	#VALUE!
CAPNS1P1	0	NA	NA	NA	NA	#VALUE!
CARD17	0	NA	NA	NA	NA	#VALUE!
CARD18	0	NA	NA	NA	NA	#VALUE!
CARM1P1	0	NA	NA	NA	NA	#VALUE!
CARMN	0	NA	NA	NA	NA	#VALUE!
CARSP1	0	NA	NA	NA	NA	#VALUE!
CARSP2	0	NA	NA	NA	NA	#VALUE!
CARTPT	0	NA	NA	NA	NA	#VALUE!
CASC16	0	NA	NA	NA	NA	#VALUE!
CASC17	0	NA	NA	NA	NA	#VALUE!
CASC20	0	NA	NA	NA	NA	#VALUE!
CASC22	0	NA	NA	NA	NA	#VALUE!
CASC23	0	NA	NA	NA	NA	#VALUE!
CASC6	0	NA	NA	NA	NA	#VALUE!
CASK-AS1	0	NA	NA	NA	NA	#VALUE!
CASKP1	0	NA	NA	NA	NA	#VALUE!
CASP12	0	NA	NA	NA	NA	#VALUE!
CASP1P1	0	NA	NA	NA	NA	#VALUE!
CASP1P2	0	NA	NA	NA	NA	#VALUE!
CATIP-AS2	0	NA	NA	NA	NA	#VALUE!
CATSPER4	0	NA	NA	NA	NA	#VALUE!
CAV3	0	NA	NA	NA	NA	#VALUE!
CBLC	0	NA	NA	NA	NA	#VALUE!
CBLN4	0	NA	NA	NA	NA	#VALUE!
CBX1P3	0	NA	NA	NA	NA	#VALUE!
CBX1P4	0	NA	NA	NA	NA	#VALUE!
CBX1P5	0	NA	NA	NA	NA	#VALUE!
CBX3P6	0	NA	NA	NA	NA	#VALUE!
CBX3P7	0	NA	NA	NA	NA	#VALUE!
CBX3P8	0	NA	NA	NA	NA	#VALUE!
CBX5P1	0	NA	NA	NA	NA	#VALUE!
CCAT1	0	NA	NA	NA	NA	#VALUE!
CCDC103	0	NA	NA	NA	NA	#VALUE!
CCDC105	0	NA	NA	NA	NA	#VALUE!
CCDC11P1	0	NA	NA	NA	NA	#VALUE!
CCDC129	0	NA	NA	NA	NA	#VALUE!
CCDC148-AS1	0	NA	NA	NA	NA	#VALUE!
CCDC166	0	NA	NA	NA	NA	#VALUE!
CCDC169-SOHLH2	0	NA	NA	NA	NA	#VALUE!
CCDC175	0	NA	NA	NA	NA	#VALUE!
CCDC177	0	NA	NA	NA	NA	#VALUE!
CCDC179	0	NA	NA	NA	NA	#VALUE!
CCDC182	0	NA	NA	NA	NA	#VALUE!
CCDC185	0	NA	NA	NA	NA	#VALUE!
CCDC190	0	NA	NA	NA	NA	#VALUE!
CCDC26	0	NA	NA	NA	NA	#VALUE!
CCDC27	0	NA	NA	NA	NA	#VALUE!
CCDC34P1	0	NA	NA	NA	NA	#VALUE!
CCDC36	0	NA	NA	NA	NA	#VALUE!
CCDC37-AS1	0	NA	NA	NA	NA	#VALUE!
CCDC42	0	NA	NA	NA	NA	#VALUE!
CCDC58P1	0	NA	NA	NA	NA	#VALUE!
CCDC58P2	0	NA	NA	NA	NA	#VALUE!
CCDC58P5	0	NA	NA	NA	NA	#VALUE!
CCDC70	0	NA	NA	NA	NA	#VALUE!
CCDC75P1	0	NA	NA	NA	NA	#VALUE!
CCDC8	0	NA	NA	NA	NA	#VALUE!
CCDC83	0	NA	NA	NA	NA	#VALUE!
CCDC92B	0	NA	NA	NA	NA	#VALUE!
CCER1	0	NA	NA	NA	NA	#VALUE!
CCIN	0	NA	NA	NA	NA	#VALUE!
CCKAR	0	NA	NA	NA	NA	#VALUE!
CCKBR	0	NA	NA	NA	NA	#VALUE!
CCL1	0	NA	NA	NA	NA	#VALUE!
CCL11	0	NA	NA	NA	NA	#VALUE!
CCL13	0	NA	NA	NA	NA	#VALUE!
CCL21	0	NA	NA	NA	NA	#VALUE!
CCL22	0	NA	NA	NA	NA	#VALUE!
CCL25	0	NA	NA	NA	NA	#VALUE!
CCL27	0	NA	NA	NA	NA	#VALUE!
CCL7	0	NA	NA	NA	NA	#VALUE!
CCL8	0	NA	NA	NA	NA	#VALUE!
CCNB1IP1P1	0	NA	NA	NA	NA	#VALUE!
CCNB1IP1P2	0	NA	NA	NA	NA	#VALUE!
CCNB2P1	0	NA	NA	NA	NA	#VALUE!
CCNB3P1	0	NA	NA	NA	NA	#VALUE!
CCND2-AS2	0	NA	NA	NA	NA	#VALUE!
CCND2P1	0	NA	NA	NA	NA	#VALUE!
CCND3P1	0	NA	NA	NA	NA	#VALUE!
CCND3P2	0	NA	NA	NA	NA	#VALUE!
CCNG2P1	0	NA	NA	NA	NA	#VALUE!
CCNHP1	0	NA	NA	NA	NA	#VALUE!
CCNJP1	0	NA	NA	NA	NA	#VALUE!
CCNJP2	0	NA	NA	NA	NA	#VALUE!
CCNL2P1	0	NA	NA	NA	NA	#VALUE!
CCNT2P1	0	NA	NA	NA	NA	#VALUE!
CCNYL3	0	NA	NA	NA	NA	#VALUE!
CCR12P	0	NA	NA	NA	NA	#VALUE!
CCR2	0	NA	NA	NA	NA	#VALUE!
CCR4	0	NA	NA	NA	NA	#VALUE!
CCR5	0	NA	NA	NA	NA	#VALUE!
CCR6	0	NA	NA	NA	NA	#VALUE!
CCR8	0	NA	NA	NA	NA	#VALUE!
CCT4P1	0	NA	NA	NA	NA	#VALUE!
CCT4P2	0	NA	NA	NA	NA	#VALUE!
CCT7P2	0	NA	NA	NA	NA	#VALUE!
CCT8L1P	0	NA	NA	NA	NA	#VALUE!
CCT8L2	0	NA	NA	NA	NA	#VALUE!
CD164L2	0	NA	NA	NA	NA	#VALUE!
CD177P1	0	NA	NA	NA	NA	#VALUE!
CD19	0	NA	NA	NA	NA	#VALUE!
CD1A	0	NA	NA	NA	NA	#VALUE!
CD1B	0	NA	NA	NA	NA	#VALUE!
CD1C	0	NA	NA	NA	NA	#VALUE!
CD1E	0	NA	NA	NA	NA	#VALUE!
CD2	0	NA	NA	NA	NA	#VALUE!
CD200R1L	0	NA	NA	NA	NA	#VALUE!
CD207	0	NA	NA	NA	NA	#VALUE!
CD24P2	0	NA	NA	NA	NA	#VALUE!
CD300A	0	NA	NA	NA	NA	#VALUE!
CD300E	0	NA	NA	NA	NA	#VALUE!
CD300LB	0	NA	NA	NA	NA	#VALUE!
CD300LD	0	NA	NA	NA	NA	#VALUE!
CD300LF	0	NA	NA	NA	NA	#VALUE!
CD300LG	0	NA	NA	NA	NA	#VALUE!
CD3D	0	NA	NA	NA	NA	#VALUE!
CD40LG	0	NA	NA	NA	NA	#VALUE!
CD46P1	0	NA	NA	NA	NA	#VALUE!
CD53	0	NA	NA	NA	NA	#VALUE!
CD69	0	NA	NA	NA	NA	#VALUE!
CD8B	0	NA	NA	NA	NA	#VALUE!
CD8BP	0	NA	NA	NA	NA	#VALUE!
CDC14C	0	NA	NA	NA	NA	#VALUE!
CDC27P1	0	NA	NA	NA	NA	#VALUE!
CDC42EP3P1	0	NA	NA	NA	NA	#VALUE!
CDCA4P2	0	NA	NA	NA	NA	#VALUE!
CDCA4P3	0	NA	NA	NA	NA	#VALUE!
CDH12P1	0	NA	NA	NA	NA	#VALUE!
CDH12P2	0	NA	NA	NA	NA	#VALUE!
CDH12P3	0	NA	NA	NA	NA	#VALUE!
CDH12P4	0	NA	NA	NA	NA	#VALUE!
CDH23-AS1	0	NA	NA	NA	NA	#VALUE!
CDK2AP2P3	0	NA	NA	NA	NA	#VALUE!
CDKN2AIPNLP2	0	NA	NA	NA	NA	#VALUE!
CDKN2AIPNLP3	0	NA	NA	NA	NA	#VALUE!
CDRT15L2	0	NA	NA	NA	NA	#VALUE!
CDRT15P2	0	NA	NA	NA	NA	#VALUE!
CDRT7	0	NA	NA	NA	NA	#VALUE!
CDX1	0	NA	NA	NA	NA	#VALUE!
CDX4	0	NA	NA	NA	NA	#VALUE!
CDY1	0	NA	NA	NA	NA	#VALUE!
CDY10P	0	NA	NA	NA	NA	#VALUE!
CDY11P	0	NA	NA	NA	NA	#VALUE!
CDY12P	0	NA	NA	NA	NA	#VALUE!
CDY13P	0	NA	NA	NA	NA	#VALUE!
CDY14P	0	NA	NA	NA	NA	#VALUE!
CDY15P	0	NA	NA	NA	NA	#VALUE!
CDY17P	0	NA	NA	NA	NA	#VALUE!
CDY18P	0	NA	NA	NA	NA	#VALUE!
CDY19P	0	NA	NA	NA	NA	#VALUE!
CDY1B	0	NA	NA	NA	NA	#VALUE!
CDY20P	0	NA	NA	NA	NA	#VALUE!
CDY22P	0	NA	NA	NA	NA	#VALUE!
CDY23P	0	NA	NA	NA	NA	#VALUE!
CDY2A	0	NA	NA	NA	NA	#VALUE!
CDY2B	0	NA	NA	NA	NA	#VALUE!
CDY3P	0	NA	NA	NA	NA	#VALUE!
CDY4P	0	NA	NA	NA	NA	#VALUE!
CDY5P	0	NA	NA	NA	NA	#VALUE!
CDY6P	0	NA	NA	NA	NA	#VALUE!
CDY7P	0	NA	NA	NA	NA	#VALUE!
CDY8P	0	NA	NA	NA	NA	#VALUE!
CDY9P	0	NA	NA	NA	NA	#VALUE!
CEACAM16	0	NA	NA	NA	NA	#VALUE!
CEACAM18	0	NA	NA	NA	NA	#VALUE!
CEACAM3	0	NA	NA	NA	NA	#VALUE!
CEACAM4	0	NA	NA	NA	NA	#VALUE!
CEACAM5	0	NA	NA	NA	NA	#VALUE!
CEACAM6	0	NA	NA	NA	NA	#VALUE!
CEACAM7	0	NA	NA	NA	NA	#VALUE!
CEACAM8	0	NA	NA	NA	NA	#VALUE!
CEACAMP10	0	NA	NA	NA	NA	#VALUE!
CEACAMP11	0	NA	NA	NA	NA	#VALUE!
CEACAMP2	0	NA	NA	NA	NA	#VALUE!
CEACAMP3	0	NA	NA	NA	NA	#VALUE!
CEACAMP4	0	NA	NA	NA	NA	#VALUE!
CEACAMP6	0	NA	NA	NA	NA	#VALUE!
CEACAMP7	0	NA	NA	NA	NA	#VALUE!
CEACAMP8	0	NA	NA	NA	NA	#VALUE!
CEACAMP9	0	NA	NA	NA	NA	#VALUE!
CEBPE	0	NA	NA	NA	NA	#VALUE!
CECR3	0	NA	NA	NA	NA	#VALUE!
CECR9	0	NA	NA	NA	NA	#VALUE!
CELA1	0	NA	NA	NA	NA	#VALUE!
CELA2A	0	NA	NA	NA	NA	#VALUE!
CELA3A	0	NA	NA	NA	NA	#VALUE!
CELA3B	0	NA	NA	NA	NA	#VALUE!
CELF2-AS2	0	NA	NA	NA	NA	#VALUE!
CELF6	0	NA	NA	NA	NA	#VALUE!
CELP	0	NA	NA	NA	NA	#VALUE!
CEMP1	0	NA	NA	NA	NA	#VALUE!
CEND1P1	0	NA	NA	NA	NA	#VALUE!
CENPUP1	0	NA	NA	NA	NA	#VALUE!
CENPUP2	0	NA	NA	NA	NA	#VALUE!
CENPVL1	0	NA	NA	NA	NA	#VALUE!
CENPVL3	0	NA	NA	NA	NA	#VALUE!
CEP57L1P1	0	NA	NA	NA	NA	#VALUE!
CER1	0	NA	NA	NA	NA	#VALUE!
CERS3-AS1	0	NA	NA	NA	NA	#VALUE!
CERS6-AS1	0	NA	NA	NA	NA	#VALUE!
CES1P1	0	NA	NA	NA	NA	#VALUE!
CES1P2	0	NA	NA	NA	NA	#VALUE!
CES5AP1	0	NA	NA	NA	NA	#VALUE!
CETN1	0	NA	NA	NA	NA	#VALUE!
CFAP206	0	NA	NA	NA	NA	#VALUE!
CFAP44-AS1	0	NA	NA	NA	NA	#VALUE!
CFAP99	0	NA	NA	NA	NA	#VALUE!
CFC1	0	NA	NA	NA	NA	#VALUE!
CFC1B	0	NA	NA	NA	NA	#VALUE!
CFHR2	0	NA	NA	NA	NA	#VALUE!
CFHR5	0	NA	NA	NA	NA	#VALUE!
CFL1P7	0	NA	NA	NA	NA	#VALUE!
CFL1P8	0	NA	NA	NA	NA	#VALUE!
CFTRP1	0	NA	NA	NA	NA	#VALUE!
CFTRP3	0	NA	NA	NA	NA	#VALUE!
CGA	0	NA	NA	NA	NA	#VALUE!
CGB1	0	NA	NA	NA	NA	#VALUE!
CGB2	0	NA	NA	NA	NA	#VALUE!
CGB5	0	NA	NA	NA	NA	#VALUE!
CGB8	0	NA	NA	NA	NA	#VALUE!
CH25H	0	NA	NA	NA	NA	#VALUE!
CHAT	0	NA	NA	NA	NA	#VALUE!
CHCHD2P1	0	NA	NA	NA	NA	#VALUE!
CHCHD2P11	0	NA	NA	NA	NA	#VALUE!
CHCHD2P3	0	NA	NA	NA	NA	#VALUE!
CHCHD2P4	0	NA	NA	NA	NA	#VALUE!
CHCHD2P5	0	NA	NA	NA	NA	#VALUE!
CHCHD2P7	0	NA	NA	NA	NA	#VALUE!
CHCHD3P2	0	NA	NA	NA	NA	#VALUE!
CHCHD4P3	0	NA	NA	NA	NA	#VALUE!
CHCHD4P5	0	NA	NA	NA	NA	#VALUE!
CHEK2P3	0	NA	NA	NA	NA	#VALUE!
CHEK2P4	0	NA	NA	NA	NA	#VALUE!
CHEK2P5	0	NA	NA	NA	NA	#VALUE!
CHI3L1	0	NA	NA	NA	NA	#VALUE!
CHIA	0	NA	NA	NA	NA	#VALUE!
CHIAP2	0	NA	NA	NA	NA	#VALUE!
CHIAP3	0	NA	NA	NA	NA	#VALUE!
CHKB-CPT1B	0	NA	NA	NA	NA	#VALUE!
CHMP1AP1	0	NA	NA	NA	NA	#VALUE!
CHODL-AS1	0	NA	NA	NA	NA	#VALUE!
CHORDC2P	0	NA	NA	NA	NA	#VALUE!
CHP2	0	NA	NA	NA	NA	#VALUE!
CHRM3-AS1	0	NA	NA	NA	NA	#VALUE!
CHRNA2	0	NA	NA	NA	NA	#VALUE!
CHRNB3	0	NA	NA	NA	NA	#VALUE!
CHRND	0	NA	NA	NA	NA	#VALUE!
CHST9	0	NA	NA	NA	NA	#VALUE!
CHTF8P1	0	NA	NA	NA	NA	#VALUE!
CHURC1-FNTB	0	NA	NA	NA	NA	#VALUE!
CICP1	0	NA	NA	NA	NA	#VALUE!
CICP10	0	NA	NA	NA	NA	#VALUE!
CICP11	0	NA	NA	NA	NA	#VALUE!
CICP12	0	NA	NA	NA	NA	#VALUE!
CICP13	0	NA	NA	NA	NA	#VALUE!
CICP17	0	NA	NA	NA	NA	#VALUE!
CICP18	0	NA	NA	NA	NA	#VALUE!
CICP2	0	NA	NA	NA	NA	#VALUE!
CICP20	0	NA	NA	NA	NA	#VALUE!
CICP23	0	NA	NA	NA	NA	#VALUE!
CICP24	0	NA	NA	NA	NA	#VALUE!
CICP26	0	NA	NA	NA	NA	#VALUE!
CICP27	0	NA	NA	NA	NA	#VALUE!
CICP4	0	NA	NA	NA	NA	#VALUE!
CICP6	0	NA	NA	NA	NA	#VALUE!
CICP7	0	NA	NA	NA	NA	#VALUE!
CICP9	0	NA	NA	NA	NA	#VALUE!
CIDEA	0	NA	NA	NA	NA	#VALUE!
CIDEB	0	NA	NA	NA	NA	#VALUE!
CIR1P2	0	NA	NA	NA	NA	#VALUE!
CIR1P3	0	NA	NA	NA	NA	#VALUE!
CISD1P1	0	NA	NA	NA	NA	#VALUE!
CISTR	0	NA	NA	NA	NA	#VALUE!
CITF22-24E5	0	NA	NA	NA	NA	#VALUE!
CITF22-62D4	0	NA	NA	NA	NA	#VALUE!
CKAP2P1	0	NA	NA	NA	NA	#VALUE!
CKBP1	0	NA	NA	NA	NA	#VALUE!
CKS1BP5	0	NA	NA	NA	NA	#VALUE!
CKS1BP7	0	NA	NA	NA	NA	#VALUE!
CLC	0	NA	NA	NA	NA	#VALUE!
CLCA4	0	NA	NA	NA	NA	#VALUE!
CLCP1	0	NA	NA	NA	NA	#VALUE!
CLDN10	0	NA	NA	NA	NA	#VALUE!
CLDN17	0	NA	NA	NA	NA	#VALUE!
CLDN22	0	NA	NA	NA	NA	#VALUE!
CLDN24	0	NA	NA	NA	NA	#VALUE!
CLDN25	0	NA	NA	NA	NA	#VALUE!
CLDN3	0	NA	NA	NA	NA	#VALUE!
CLDN5	0	NA	NA	NA	NA	#VALUE!
CLDN8	0	NA	NA	NA	NA	#VALUE!
CLEC10A	0	NA	NA	NA	NA	#VALUE!
CLEC14A	0	NA	NA	NA	NA	#VALUE!
CLEC19A	0	NA	NA	NA	NA	#VALUE!
CLEC1B	0	NA	NA	NA	NA	#VALUE!
CLEC2A	0	NA	NA	NA	NA	#VALUE!
CLEC2L	0	NA	NA	NA	NA	#VALUE!
CLEC4C	0	NA	NA	NA	NA	#VALUE!
CLEC4D	0	NA	NA	NA	NA	#VALUE!
CLEC4E	0	NA	NA	NA	NA	#VALUE!
CLEC4F	0	NA	NA	NA	NA	#VALUE!
CLEC4G	0	NA	NA	NA	NA	#VALUE!
CLEC4GP1	0	NA	NA	NA	NA	#VALUE!
CLEC5A	0	NA	NA	NA	NA	#VALUE!
CLEC7A	0	NA	NA	NA	NA	#VALUE!
CLEC9A	0	NA	NA	NA	NA	#VALUE!
CLECL1	0	NA	NA	NA	NA	#VALUE!
CLIC4P2	0	NA	NA	NA	NA	#VALUE!
CLPTM1LP1	0	NA	NA	NA	NA	#VALUE!
CLRN1	0	NA	NA	NA	NA	#VALUE!
CLRN2	0	NA	NA	NA	NA	#VALUE!
CLRN3	0	NA	NA	NA	NA	#VALUE!
CLUHP1	0	NA	NA	NA	NA	#VALUE!
CLUHP2	0	NA	NA	NA	NA	#VALUE!
CLUHP4	0	NA	NA	NA	NA	#VALUE!
CLUHP6	0	NA	NA	NA	NA	#VALUE!
CLUHP8	0	NA	NA	NA	NA	#VALUE!
CLYBL-AS1	0	NA	NA	NA	NA	#VALUE!
CLYBL-AS2	0	NA	NA	NA	NA	#VALUE!
CMA1	0	NA	NA	NA	NA	#VALUE!
CMP21-97G8	0	NA	NA	NA	NA	#VALUE!
CNGA2	0	NA	NA	NA	NA	#VALUE!
CNGA3	0	NA	NA	NA	NA	#VALUE!
CNN2P10	0	NA	NA	NA	NA	#VALUE!
CNN2P12	0	NA	NA	NA	NA	#VALUE!
CNN2P3	0	NA	NA	NA	NA	#VALUE!
CNN2P4	0	NA	NA	NA	NA	#VALUE!
CNN2P7	0	NA	NA	NA	NA	#VALUE!
CNN2P8	0	NA	NA	NA	NA	#VALUE!
CNN3P1	0	NA	NA	NA	NA	#VALUE!
CNOT10-AS1	0	NA	NA	NA	NA	#VALUE!
CNOT4P1	0	NA	NA	NA	NA	#VALUE!
CNOT7P2	0	NA	NA	NA	NA	#VALUE!
CNPY1	0	NA	NA	NA	NA	#VALUE!
CNTFR-AS1	0	NA	NA	NA	NA	#VALUE!
CNTN4-AS1	0	NA	NA	NA	NA	#VALUE!
CNTN4-AS2	0	NA	NA	NA	NA	#VALUE!
COL10A1	0	NA	NA	NA	NA	#VALUE!
COL11A2P1	0	NA	NA	NA	NA	#VALUE!
COL18A1-AS1	0	NA	NA	NA	NA	#VALUE!
COL18A1-AS2	0	NA	NA	NA	NA	#VALUE!
COL5A1-AS1	0	NA	NA	NA	NA	#VALUE!
COL6A5	0	NA	NA	NA	NA	#VALUE!
COLCA1	0	NA	NA	NA	NA	#VALUE!
COMMD3-BMI1	0	NA	NA	NA	NA	#VALUE!
COMP	0	NA	NA	NA	NA	#VALUE!
COPS8P3	0	NA	NA	NA	NA	#VALUE!
COQ10BP2	0	NA	NA	NA	NA	#VALUE!
CORO7-PAM16	0	NA	NA	NA	NA	#VALUE!
CoTC_ribozyme	0	NA	NA	NA	NA	#VALUE!
COTL1P1	0	NA	NA	NA	NA	#VALUE!
COTL1P2	0	NA	NA	NA	NA	#VALUE!
COX11P1	0	NA	NA	NA	NA	#VALUE!
COX4I1P1	0	NA	NA	NA	NA	#VALUE!
COX4I1P2	0	NA	NA	NA	NA	#VALUE!
COX4I2	0	NA	NA	NA	NA	#VALUE!
COX5BP3	0	NA	NA	NA	NA	#VALUE!
COX5BP7	0	NA	NA	NA	NA	#VALUE!
COX5BP8	0	NA	NA	NA	NA	#VALUE!
COX6A1P3	0	NA	NA	NA	NA	#VALUE!
COX6A2	0	NA	NA	NA	NA	#VALUE!
COX6B1P1	0	NA	NA	NA	NA	#VALUE!
COX6B1P2	0	NA	NA	NA	NA	#VALUE!
COX6B1P3	0	NA	NA	NA	NA	#VALUE!
COX6B1P4	0	NA	NA	NA	NA	#VALUE!
COX6B1P6	0	NA	NA	NA	NA	#VALUE!
COX6B1P7	0	NA	NA	NA	NA	#VALUE!
COX6CP10	0	NA	NA	NA	NA	#VALUE!
COX6CP11	0	NA	NA	NA	NA	#VALUE!
COX6CP12	0	NA	NA	NA	NA	#VALUE!
COX6CP13	0	NA	NA	NA	NA	#VALUE!
COX6CP14	0	NA	NA	NA	NA	#VALUE!
COX6CP15	0	NA	NA	NA	NA	#VALUE!
COX6CP16	0	NA	NA	NA	NA	#VALUE!
COX6CP17	0	NA	NA	NA	NA	#VALUE!
COX6CP18	0	NA	NA	NA	NA	#VALUE!
COX6CP4	0	NA	NA	NA	NA	#VALUE!
COX6CP5	0	NA	NA	NA	NA	#VALUE!
COX6CP6	0	NA	NA	NA	NA	#VALUE!
COX6CP7	0	NA	NA	NA	NA	#VALUE!
COX6CP8	0	NA	NA	NA	NA	#VALUE!
COX7BP2	0	NA	NA	NA	NA	#VALUE!
CPA1	0	NA	NA	NA	NA	#VALUE!
[truncated: 43,022 more rows]

## Sheet: GSEA gene lists
HALLMARK_TNFA_SIGNALING_VIA_NFKB	HALLMARK_HYPOXIA	HALLMARK_CHOLESTEROL_HOMEOSTASIS	HALLMARK_MITOTIC_SPINDLE	HALLMARK_WNT_BETA_CATENIN_SIGNALING	HALLMARK_TGF_BETA_SIGNALING	HALLMARK_IL6_JAK_STAT3_SIGNALING	HALLMARK_DNA_REPAIR	HALLMARK_G2M_CHECKPOINT	HALLMARK_APOPTOSIS	HALLMARK_NOTCH_SIGNALING	HALLMARK_ADIPOGENESIS	HALLMARK_ESTROGEN_RESPONSE_EARLY	HALLMARK_ESTROGEN_RESPONSE_LATE	HALLMARK_ANDROGEN_RESPONSE	HALLMARK_MYOGENESIS	HALLMARK_PROTEIN_SECRETION	HALLMARK_INTERFERON_ALPHA_RESPONSE	HALLMARK_INTERFERON_GAMMA_RESPONSE	HALLMARK_APICAL_JUNCTION	HALLMARK_APICAL_SURFACE	HALLMARK_HEDGEHOG_SIGNALING	HALLMARK_COMPLEMENT	HALLMARK_UNFOLDED_PROTEIN_RESPONSE	HALLMARK_PI3K_AKT_MTOR_SIGNALING	HALLMARK_MTORC1_SIGNALING	HALLMARK_E2F_TARGETS	HALLMARK_MYC_TARGETS_V1	HALLMARK_MYC_TARGETS_V2	HALLMARK_EPITHELIAL_MESENCHYMAL_TRANSITION	HALLMARK_INFLAMMATORY_RESPONSE	HALLMARK_XENOBIOTIC_METABOLISM	HALLMARK_FATTY_ACID_METABOLISM	HALLMARK_OXIDATIVE_PHOSPHORYLATION	HALLMARK_GLYCOLYSIS	HALLMARK_REACTIVE_OXIGEN_SPECIES_PATHWAY	HALLMARK_P53_PATHWAY	HALLMARK_UV_RESPONSE_UP	HALLMARK_UV_RESPONSE_DN	HALLMARK_ANGIOGENESIS	HALLMARK_HEME_METABOLISM	HALLMARK_COAGULATION	HALLMARK_IL2_STAT5_SIGNALING	HALLMARK_BILE_ACID_METABOLISM	HALLMARK_PEROXISOME	HALLMARK_ALLOGRAFT_REJECTION	HALLMARK_SPERMATOGENESIS	HALLMARK_KRAS_SIGNALING_UP	HALLMARK_KRAS_SIGNALING_DN	HALLMARK_PANCREAS_BETA_CELLS
http://www.broadinstitute.org/gsea/msigdb/cards/HALLMARK_TNFA_SIGNALING_VIA_NFKB	http://www.broadinstitute.org/gsea/msigdb/cards/HALLMARK_HYPOXIA	http://www.broadinstitute.org/gsea/msigdb/cards/HALLMARK_CHOLESTEROL_HOMEOSTASIS	http://www.broadinstitute.org/gsea/msigdb/cards/HALLMARK_MITOTIC_SPINDLE	http://www.broadinstitute.org/gsea/msigdb/cards/HALLMARK_WNT_BETA_CATENIN_SIGNALING	http://www.broadinstitute.org/gsea/msigdb/cards/HALLMARK_TGF_BETA_SIGNALING	http://www.broadinstitute.org/gsea/msigdb/cards/HALLMARK_IL6_JAK_STAT3_SIGNALING	http://www.broadinstitute.org/gsea/msigdb/cards/HALLMARK_DNA_REPAIR	http://www.broadinstitute.org/gsea/msigdb/cards/HALLMARK_G2M_CHECKPOINT	http://www.broadinstitute.org/gsea/msigdb/cards/HALLMARK_APOPTOSIS	http://www.broadinstitute.org/gsea/msigdb/cards/HALLMARK_NOTCH_SIGNALING	http://www.broadinstitute.org/gsea/msigdb/cards/HALLMARK_ADIPOGENESIS	http://www.broadinstitute.org/gsea/msigdb/cards/HALLMARK_ESTROGEN_RESPONSE_EARLY	http://www.broadinstitute.org/gsea/msigdb/cards/HALLMARK_ESTROGEN_RESPONSE_LATE	http://www.broadinstitute.org/gsea/msigdb/cards/HALLMARK_ANDROGEN_RESPONSE	http://www.broadinstitute.org/gsea/msigdb/cards/HALLMARK_MYOGENESIS	http://www.broadinstitute.org/gsea/msigdb/cards/HALLMARK_PROTEIN_SECRETION	http://www.broadinstitute.org/gsea/msigdb/cards/HALLMARK_INTERFERON_ALPHA_RESPONSE	http://www.broadinstitute.org/gsea/msigdb/cards/HALLMARK_INTERFERON_GAMMA_RESPONSE	http://www.broadinstitute.org/gsea/msigdb/cards/HALLMARK_APICAL_JUNCTION	http://www.broadinstitute.org/gsea/msigdb/cards/HALLMARK_APICAL_SURFACE	http://www.broadinstitute.org/gsea/msigdb/cards/HALLMARK_HEDGEHOG_SIGNALING	http://www.broadinstitute.org/gsea/msigdb/cards/HALLMARK_COMPLEMENT	http://www.broadinstitute.org/gsea/msigdb/cards/HALLMARK_UNFOLDED_PROTEIN_RESPONSE	http://www.broadinstitute.org/gsea/msigdb/cards/HALLMARK_PI3K_AKT_MTOR_SIGNALING	http://www.broadinstitute.org/gsea/msigdb/cards/HALLMARK_MTORC1_SIGNALING	http://www.broadinstitute.org/gsea/msigdb/cards/HALLMARK_E2F_TARGETS	http://www.broadinstitute.org/gsea/msigdb/cards/HALLMARK_MYC_TARGETS_V1	http://www.broadinstitute.org/gsea/msigdb/cards/HALLMARK_MYC_TARGETS_V2	http://www.broadinstitute.org/gsea/msigdb/cards/HALLMARK_EPITHELIAL_MESENCHYMAL_TRANSITION	http://www.broadinstitute.org/gsea/msigdb/cards/HALLMARK_INFLAMMATORY_RESPONSE	http://www.broadinstitute.org/gsea/msigdb/cards/HALLMARK_XENOBIOTIC_METABOLISM	http://www.broadinstitute.org/gsea/msigdb/cards/HALLMARK_FATTY_ACID_METABOLISM	http://www.broadinstitute.org/gsea/msigdb/cards/HALLMARK_OXIDATIVE_PHOSPHORYLATION	http://www.broadinstitute.org/gsea/msigdb/cards/HALLMARK_GLYCOLYSIS	http://www.broadinstitute.org/gsea/msigdb/cards/HALLMARK_REACTIVE_OXIGEN_SPECIES_PATHWAY	http://www.broadinstitute.org/gsea/msigdb/cards/HALLMARK_P53_PATHWAY	http://www.broadinstitute.org/gsea/msigdb/cards/HALLMARK_UV_RESPONSE_UP	http://www.broadinstitute.org/gsea/msigdb/cards/HALLMARK_UV_RESPONSE_DN	http://www.broadinstitute.org/gsea/msigdb/cards/HALLMARK_ANGIOGENESIS	http://www.broadinstitute.org/gsea/msigdb/cards/HALLMARK_HEME_METABOLISM	http://www.broadinstitute.org/gsea/msigdb/cards/HALLMARK_COAGULATION	http://www.broadinstitute.org/gsea/msigdb/cards/HALLMARK_IL2_STAT5_SIGNALING	http://www.broadinstitute.org/gsea/msigdb/cards/HALLMARK_BILE_ACID_METABOLISM	http://www.broadinstitute.org/gsea/msigdb/cards/HALLMARK_PEROXISOME	http://www.broadinstitute.org/gsea/msigdb/cards/HALLMARK_ALLOGRAFT_REJECTION	http://www.broadinstitute.org/gsea/msigdb/cards/HALLMARK_SPERMATOGENESIS	http://www.broadinstitute.org/gsea/msigdb/cards/HALLMARK_KRAS_SIGNALING_UP	http://www.broadinstitute.org/gsea/msigdb/cards/HALLMARK_KRAS_SIGNALING_DN	http://www.broadinstitute.org/gsea/msigdb/cards/HALLMARK_PANCREAS_BETA_CELLS
JUNB	PGK1	FDPS	ARHGEF2	MYC	TGFBR1	IL4R	POLR2H	AURKA	CASP3	JAG1	FABP4	GREB1	TFF1	KLK3	ACTA1	ARCN1	MX1	STAT1	ACTN1	B4GALT1	SHH	C2	ATF4	MAPK8	FADS1	AURKA	PCNA	SLC19A1	COL3A1	CXCL10	CYP1A1	ACAA1	NDUFS3	PGK1	GSR	CDKN1A	NXF1	TJP1	VCAN	ALAS2	F2	SOCS2	SCP2	ABCD3	PTPRC	PDHA2	ANGPTL4	CDH16	PAX6
CXCL2	PDK1	CYP51A1	CLASP1	CTNNB1	SMAD7	IL6ST	POLR2A	CCNA2	CASP9	NOTCH3	ADIPOQ	CA12	SLC9A3R1	KLK2	TNNI2	TMED10	ISG15	ISG15	CLDN7	RHCG	PTCH1	C1S	HERPUD1	PIK3R3	DDIT4	BRCA2	PSMD8	MRTO4	COL5A2	CCL2	FAH	ACAA2	UQCRB	ALDOA	PRDX2	BTG2	SLC6A8	NFIB	POSTN	PPOX	PROC	CISH	ABCD3	ACOT8	IL12B	TSSK2	ITGA2	SPTBN2	NEUROD1
ATF3	GBE1	IDI1	KIF11	JAG2	TGFB1	STAT1	POLR2G	TOP2A	DFFA	NOTCH2	PPARG	SLC9A3R1	TPD52L1	ACSL3	MYL1	COPB2	OAS1	IFIT1	ACTN3	MAL	NRCAM	CFB	PARN	GRB2	CALR	CCP110	PSMD7	TMEM97	COL5A1	CCL5	DCXR	ACADL	NDUFS2	ENO1	TXNRD1	MDM2	BAK1	TGFBR3	FSTL1	FECH	C1S	PIM1	SLC27A2	ACOX1	TGFB1	TNP1	SPRY2	FGFR3	ISL1
NFKBIA	PFKL	FDFT1	KIF23	NOTCH1	SMURF2	IL1R1	POLR2E	CCNB2	CASP7	APH1A	LIPE	MYB	PRSS23	PIAS1	TNNC1	RAB14	IFIT3	MX1	CLDN19	LYPD3	NRP1	C1R	EXOSC4	NFKBIB	HK2	CENPE	SET	RRP9	FBN1	FPR1	CYP1A2	ACADM	SDHA	TPI1	SOD1	CCNG1	CDC5L	TFPI	LRPAP1	HMBS	MMP14	IL2RA	HSD3B7	ACSL1	IL12A	ZPBP	HBEGF	NOS1	NKX2-2
TNFAIP3	ALDOA	DHCR7	ALS2	DLL1	SMURF1	CSF2RB	POLR2J	CENPA	CFLAR	HES1	DGAT1	ANXA9	CA12	CAMKK2	TNNC2	ATP7A	IFI44	IFIT3	DLG1	PKHD1	SCG2	SERPINE1	HSP90B1	MAP2K6	PGK1	CKS2	SNRPA1	PES1	COL1A1	CCL20	GSTA3	ACOT8	UQCRC1	PFKP	GCLC	FAS	HSPA2	MMP16	STC1	GYPB	F10	TNFRSF4	HSD17B4	ECH1	CD3E	DPEP3	RBP4	PDE6B	PCSK1
PTGS2	ENO2	SQLE	ARF6	AXIN2	BMPR2	SOCS3	POLR2F	BIRC5	BIRC3	CCND1	LPL	IGFBP4	PDZK1	NKX3-1	MYH3	COPB1	IFI35	IFI35	TJP1	ATP6V0A4	AMOT	MMP14	XBP1	MAPK9	SLC7A5	DCLRE1B	RAN	TFB2M	FN1	IL1A	CYP2J2	ACOX1	NDUFA9	ERO1L	CAT	TOB1	POLR2H	ABCC1	LPL	ALAD	PLG	SOCS1	AKR1D1	ECI2	CD3D	ADAM2	HSD11B1	SIDT1	NKX6-1
CXCL1	PGM1	HMGCS1	MYO9B	PSEN2	SKIL	STAT3	POLR2C	CDC20	PMAIP1	FZD1	CPT2	SYBU	ANXA9	TMPRSS2	MYLPF	LAMP2	IRF7	IRF7	COL17A1	AIM1	UNC5C	SERPING1	EXOSC9	AKT1	CTSC	DNMT1	SRSF2	EXOSC5	COL6A3	IL8	CYP27A1	ACSL1	NDUFS4	ALDOB	GPX4	GADD45A	ALAS1	MAP2K5	VEGFA	RHD	C1R	TNFRSF9	ABCD2	EHHADH	CD28	ACTL7B	ETV4	NTF3	SLC2A2
IER3	NDRG1	NSDHL	MYH9	FZD1	SKI	OSMR	POLR2K	PLK1	CASP8	PSEN2	CD36	NPY1R	CELSR2	APPBP2	TNNT3	EGFR	RSAD2	IFIT2	PVRL1	SHROOM2	GPR56	CTSL1	HSPA5	MAPK1	ACSL3	DONSON	G3BP1	IPO4	SERPINE1	CCL7	ADH1C	ALDH3A2	NDUFS1	VEGFA	MPO	PHLDA3	TUBA4A	AGGF1	PF4	GYPA	SERPINE1	XBP1	PEX1	GSTK1	LYN	GAPDHS	GLRX	SCN10A	SEC11A
CD83	HK2	LSS	TUBGCP3	NOTCH4	ACVR1	IL2RG	GTF2H3	TTK	JUN	FZD7	GPAM	PDZK1	TJP3	CENPN	TNNT2	IGF2R	IFI44L	OAS2	CLDN9	SRPX	HEY1	F5	ATF3	PLCG1	SLC1A5	EED	STARD7	NDUFAF4	COL1A2	CCL22	UGDH	CCDC58	NDUFA2	MXI1	PRDX1	TAP1	C4BPB	PLCB4	THBD	SELENBP1	SERPING1	RRAGD	CYP8B1	HSD17B4	HCLS1	TUBA3C	DUSP6	TAS2R4	DCX
CCL20	ALDOC	MVD	CKAP5	LEF1	PMEPA1	IFNGR1	POLR2D	PRC1	BCL2L11	DTX1	ADIPOR2	NRIP1	PGR	BMPR1B	CASQ2	COPE	IFITM1	TAP1	CDH3	MDGA1	GLI1	MMP13	EXOSC1	TRIB3	M6PR	GINS1	NPM1	NOC4L	COL4A1	CXCL11	ASL	CPT2	NDUFS8	PKM2	PRDX6	CDKN2B	CCNE1	MET	FGFR1	BLVRB	C2	HK2	PNPLA8	MLYCD	IL18	LDHC	SCG5	DTNB	SPCS1
CXCL3	GPI	LDLR	RACGAP1	AXIN1	NCOR2	TYK2	ERCC3	NDC80	MCL1	DLL1	ACAA2	MLPH	RET	MAF	ACTC1	PPT1	IFI27	EIF2AK2	CTNND1	TMEM8B	THY1	F7	EXOSC5	GSK3B	TFRC	GINS4	BUB3	MYC	COL4A2	CCR7	NQO1	CYP4A11	SDHB	HK2	GCLM	SFN	EPHX1	IRS1	TNFRSF21	GYPE	F12	PHLDA1	PHYH	PEX11A	CRTAM	DDX25	ETV5	HTR1D	FOXA2
MAFF	MXI1	TM7SF2	PREX1	NKD1	SERPINE1	IL13RA1	DDB2	KIF11	IL1B	FZD5	ETFB	HSPB8	MYB	FADS1	MYOM1	AP3S1	IRF9	RSAD2	CDH1	THY1	SLIT1	CTSS	ASNS	MAP2K3	DDIT3	H2AFZ	EIF3D	SRM	VCAN	EDN1	ALAS1	DECR1	NNT	LDHA	TXN	ZMAT3	GRPEL1	PTPRM	CCND2	GYPC	CFI	IL2RB	SLC27A5	RETSAT	IFNG	PRM2	ITGB2	MAST3	GCK
NFKB2	SLC2A1	ALDOC	ARHGEF3	WNT5B	JUNB	TLR2	POLR1C	NUSAP1	SPTAN1	MAML2	ACOX1	EGR3	TPBG	ZBTB10	MYL4	BET1	OASL	MX2	LIMA1	PCSK9	CDK6	LGMN	ARFGAP1	CDKN1A	TMEM97	LIG1	XPO1	PA2G4	IGFBP3	CD40	GSTM4	ECH1	ATP5O	EXT1	SOD2	DDB2	ICAM1	AKT3	COL5A2	EPB42	MMP2	CTLA4	CYP7B1	SLC27A2	CD3G	TCP11	AKT2	SLC6A3	MAFB
TNFAIP2	P4HA1	EBP	NUMA1	CUL1	SMAD1	IFNGR2	XPC	CKS2	DIABLO	NOTCH1	ACADM	KRT19	EGR3	HMGCR	MYBPH	CLCN3	EIF2AK2	IRF1	VCL	EPHB4	HEY2	PLG	WFS1	RAC1	IFRD1	MAD2L1	FBL	GNL3	TGFBI	CXCL9	CYP2C18	ECI1	ATP5G3	SLC25A10	PRDX4	EI24	FEN1	SIPA1L1	ITGAV	SLC4A1	C3	NFIL3	CYP27A1	PEX13	CD86	PIAS2	PPBP	CLDN8	INS
HBEGF	ADM	SCD	SPTBN1	JAG1	SMAD6	IL10RB	PCNA	KIF2C	BAX	PSENEN	HADH	LRIG1	ARL3	SPCS3	MYH7	AP2S1	IFIT2	OAS3	SHROOM2	DCBLD2	NRP2	C1QA	SRPRB	RIPK1	PLOD2	MCM2	EIF4A1	NOLC1	SPARC	IL6	PTS	ELOVL5	NDUFS7	GUSB	SELS	PERP	ARRB2	NR1D2	SERPINA5	RHCE	F9	CD83	PEX26	PEX14	IL10	PAPOLB	G0S2	TGM1	PDX1
KLF6	P4HA2	PMVK	KIF2C	MAML1	PPP1R15A	IL6	POLR2I	MKI67	BIK	WNT5A	IDH1	KDM4B	OLFM1	INSIG1	MYH8	CLTC	CXCL10	TNFSF10	PVRL3	GHRL	TLE3	CASP1	DNAJB9	AKT1S1	TUBA4A	MCM4	CANX	WDR43	LUM	IL1B	CYB5A	FABP1	ATP5A1	PFKFB1	PDLIM1	DDIT4	JUNB	ATRN	KCNJ8	RHAG	CTSO	IKZF2	AGXT	SCP2	UBE2N	OAZ3	GABRA3	PCDHB1	ABCC8
BIRC3	ENO1	MVK	KIF5B	KAT2A	TGIF1	IL1R2	SUPT4H1	AURKB	IL1A	CUL1	SORBS1	PGR	NPY1R	NGLY1	ACTN2	AP2M1	TAP1	IRF9	PVRL2	LYN	TLE1	GZMA	TSPYL2	ACTR2	PSAT1	MCM5	NAP1L1	RABEPK	LAMC1	TLR2	ACOX2	FABP2	NDUFV1	PGAM1	TXNRD2	ATF3	CTSL2	ANXA2	APP	TAL1	TMPRSS6	IL10	PEX7	HSD3B7	BCL10	PHF7	IRF8	THRB	IAPP
PLAUR	PFKP	LPL	TTK	GNAI1	FURIN	IL3RA	POLD3	TPX2	BID	WNT2	ACADS	RHOBTB3	SCNN1A	UBE2J1	TNNI1	RER1	SP110	CXCL10	CLDN14	GAS1	L1CAM	ADAM9	NFYA	PRKAR2A	CORO1A	MCM7	CBX3	NOP16	LOX	IL1R1	EPHX1	HADH	COX5B	PYGB	HBXIP	BAX	DGAT1	ADD3	JAG1	42802	MMP9	TNFRSF18	CROT	GNPAT	CD4	ODF1	BIRC3	YPEL1	SRP9
ZFP36	AK4	SC5DL	APC	WNT6	SMAD3	IFNAR1	POLR3GL	SMC4	CDKN1A	DTX4	UCK1	TPD52L1	XBP1	ELK4	CRYAB	KIF1B	DDX60	IFI44	PTPRC	FLOT2	PLG	CALM3	CALR	YWHAB	LDHA	MELK	CCT3	TBRG4	LAMC2	CD69	LCAT	HIBCH	UQCRH	AK4	G6PD	SESN1	ATF3	CDKN1B	COL3A1	SPTB	PROZ	DHRS3	CYP39A1	ABCD2	LCK	ACRBP	FGF9	RYR2	NEUROG3
ICAM1	FAM162A	FADS2	CEP250	PTCH1	FKBP1A	TNFRSF1A	POLR3C	BUB1	GADD45A	SAP30	SCP2	ELOVL2	AREG	ABCC4	SGCG	ARF1	UBE2L6	BST2	THY1	PLAUR	NKX6-1	C1QC	KHSRP	HRAS	MTHFD2	MMS22L	C1QBP	DDX18	CTGF	ICAM1	SLC35D1	HMGCL	NDUFA1	P4HA1	MSRA	FDXR	CASP3	ATXN1	SPP1	UROD	MMP1	ECM1	ABCA3	SLC25A17	NCK1	YBX2	DCBLD2	GDNF	FOXO1
JUN	PFKFB3	HMGCR	PAFAH1B1	NCOR2	MAP3K7	MYD88	GTF2B	CENPF	DDIT3	PPARD	DECR1	RET	IL17RB	ELOVL5	HRC	OCRL	USP18	XAF1	VASP	AKAP7	NF1	TIMP1	DNAJC3	PDK1	FADS2	NAA38	U2AF1	NIP7	TAGLN	CCRL2	GSS	HSD17B11	ATP5C1	PMM2	MBP	PIDD	RASGRP1	CAP2	NRP1	HBQ1	CFB	ADAM19	CYP7A1	PEX2	C2	CSNK2A2	INHBA	CAMK1D	AKT3
EGR3	VEGFA	HSD17B7	CDC42EP2	DKK4	BMPR1A	ACVR1B	POLR1D	RACGAP1	CDKN1B	KAT2A	CDKN2C	TPBG	NRIP1	ALDH1A3	TNNT1	ICA1	PSMB8	SP110	ITGB1	ATP8B1	RASA1	DPP4	EXOSC2	PIKFYVE	VLDLR	NASP	UBE2L3	WDR74	COL7A1	AQP9	FMO3	IDH1	ATP5B	FAM162A	SRXN1	SAT1	TMBIM6	PRDM2	OLR1	DCAF11	BMP1	SLC2A3	HACL1	ACAA1	HLA-A	NAA11	TFPI	AMBN	GCG
IL1B	BNIP3L	ANXA13	KIF3B	HDAC2	CTNNB1	CSF3R	NCBP2	CENPE	TNF	HEYL	TALDO1	TFF1	ASS1	TARP	DES	MON2	IFIH1	OASL	ZYX	EFNA5	ETS2	KLK1	NOP14	TBK1	WARS	NUDT21	SSBP1	BYSL	LOXL2	EREG	IDH1	ME1	COX7B	SDC1	NQO1	CDKN2A	FOS	FAM179B	PDGFA	ERMAP	VWF	HIPK2	PIPOX	HAO2	ITGB2	TULP2	TSPAN1	LFNG	DPP4
BCL2A1	TPI1	SREBF2	CCDC88A	DKK1	HIPK2	ITGB3	RDBP	KIF23	GSN	SKP1	TST	MAPT	TFF3	AZGP1	MYOZ1	ARFGEF2	BST2	PSMB8	ACTN4	SLC34A3	RTN1	KLKB1	ATF6	ACTR3	SCD	NUP205	SRSF1	HSPD1	COL6A2	C3AR1	AKR1C3	MGLL	SDHD	EGLN3	OXSR1	AEN	TAP1	SDC2	PTK2	EIF2AK1	FGA	BATF3	PEX6	HSD17B11	HLA-DQA1	ADAD1	ADAM8	SERPINA10	PAX4
PPP1R15A	ERO1L	PCYT2	KIF15	TCF7	KLF10	REG1A	GTF2F1	UBE2C	TNFSF10	RBX1	MCCC1	SCNN1A	FKBP4	ABHD2	RYR1	TMED2	LGALS3BP	IFI44L	CLDN4	APP	CRMP1	CD59	HYOU1	E2F1	P4HA1	ORC6	TCP1	PLK4	ITGAV	GNA15	SLC22A1	MLYCD	CYCS	PC	GLRX2	PPM1D	E2F5	SMAD3	SLCO2A1	CPOX	F11	BHLHE40	SOD1	CRAT	CD1D	SYCP1	SLPI	ALOX12B	SYT13
ZC3H12A	KDM3A	ACSS2	BIRC5	WNT1	BMP2	CXCL1	ERCC5	MCM6	CASP6	TCF7L2	PGM1	ABAT	SLC27A2	SAT1	CSRP3	NAPG	ADAR	IFITM3	CADM3	GSTM3	MYH9	CR2	RRP9	MYD88	ACTR2	PCNA	MCM2	NOP2	THBS2	CMKLR1	GSTO1	PCBD1	NDUFA6	B4GALT7	HMOX2	FOXO3	RAB27A	SLC7A1	PGLYRP1	MPP1	THBD	PTGER2	GNPAT	PEX11B	CD80	DDX4	PRKG2	CALCB	SCGN
SOD2	CCNG2	ATF3	CNTROB	NUMB	ENG	A2M	LIG1	MCM3	SQSTM1	ARRB1	REEP5	FLNB	SEMA3B	DBI	ADAM12	TMX1	ISG20	DDX60	ITGA3	HSPB1	VEGFA	MMP15	NOP56	ITPR2	IDH1	PLK4	EIF3B	PPAN	COL16A1	PTGER4	ARG1	RETSAT	NDUFAB1	FBP2	FES	BTG1	CCND3	GCNT1	VAV2	GLRX5	FURIN	DENND5A	HSD3B1	LONP2	HLA-DRA	MLF1	MMP11	FGGY	HNF1A
NR4A2	LDHA	ADH4	NF1	ADAM17	APC	CSF2RA	ERCC1	PTTG1	FASLG	LFNG	BCL2L13	XBP1	GPER	DHCR24	ATP2A1	PAM	GBP2	LGALS3BP	NF2	SLC2A4	CELSR1	LAP3	CXXC1	SQSTM1	SLC2A1	POLE	PSMD14	NOP56	NNMT	LIF	CDO1	S100A10	COX8A	IGFBP3	PFKP	TXNIP	SLC25A4	RUNX1	S100A4	TSPAN5	MMP11	ITIH5	ABCA2	IDH1	THY1	TEKT2	MMP10	SPRR3	STXBP1
IL1A	GYS1	ETHE1	TSC1	DVL2	PPM1A	IL15RA	ERCC4	CDK1	EGR3	PRKCA	SLC25A10	CELSR2	LLGL2	SORD	CKM	SCAMP1	IRF1	GBP4	B4GALT1	IL2RB	CNTFR	SPOCK2	IGFBP1	RPS6KA1	GBE1	PRIM2	SNRPA	RCL1	TPM1	IL15	FMO1	SUCLG1	ACO2	CHPF	NDUFB4	SLC19A2	SPR	RND3	MSX1	OSBP2	F8	PHTF2	HAO1	FIS1	TLR1	SPATA6	TMEM158	ATP6V1B1	CHGA
RELB	GAPDH	ECH1	CDC27	PPARD	XIAP	IRF9	POLD4	KIF4A	CD44	DTX2	ME1	RAB31	AGR2	STK39	SVIL	SH3GL2	PLSCR1	IRF8	NEXN	RTN4RL1	ACHE	F10	CNOT4	PTPN11	SERPINH1	RAD51AP1	PWP1	NPM1	CDH2	NAMPT	ALDH9A1	VNN1	ATP5G1	B3GAT3	GPX3	IER3	CDKN2B	PPAP2B	VTN	ANK1	LGMN	GADD45B	PEX16	PEX6	HLA-G	PGK2	TNFAIP3	EDN1	VDR
TRAF1	BHLHE40	CBS	CNTRL	NCSTN	CDH1	PDGFC	COBRA1	ESPL1	FAS	ST3GAL6	PHYH	MYBL1	KRT19	TPD52	MYOM2	RAB2A	PSMB9	PSMB9	CDH6	NCOA6	PML	CTSB	DCP2	MAPKAP1	NUPR1	RFC2	APEX1	AIMP2	MMP2	OPRK1	POR	EHHADH	CYC1	CHST12	SCAF4	TP53	SHOX2	NR3C1	TIMP1	NFE2	HPN	NRP1	ABCD1	ABCB4	HLA-DMB	HSPA2	PRDM1	UPK3B	PCSK2
BTG2	ANGPTL4	GUSB	TUBGCP5	HDAC5	ID1	HAX1	RFC2	MAD2L1	IL18	FBXW11	PIM3	MREG	WISP2	IDI1	MYL6B	COG2	HERC6	PML	ADAM15	SULF2	CDK5R1	SERPINA1	PDIA6	PLCB1	PSMG1	RPA2	TXNL4A	RRP12	COL11A1	ITGB8	NDRG2	ALDH9A1	NDUFB6	HS2ST1	CDKN2D	NOTCH1	OLFM1	YTHDC1	APOH	AHSP	CTSB	NCOA3	ACSL1	SOD1	IL7	ACRV1	GALNT3	GAMT	INSM1
DUSP1	JUN	FASN	KIF4A	CCND2	LEFTY2	BAK1	ELL	NEK2	IGFBP6		YWHAG	FAM102A	BLVRB	B2M	TPM2	VAMP3	SAMD9	IFIH1	PTK2	ADAM10	VLDLR	CTSO	ATP6V0D1	RAF1	PSPH	RPA3	HNRNPR	PPRC1	THBS1	PTAFR	UPB1	HADHB	ATP5E	MPI	MGST1	RRAD	IGFBP2	PPARG	PRG2	SPTA1	MBL2	CD79B	MLYCD	ABCB1	IL4	CLPB	ETS1	PRODH	SST
MAP3K8	SERPINE1	LGALS3	MAPRE1	FRAT1	CDKN1C	EBI3	TAF10	KIF22	PRF1		NDUFAB1	MSMB	FLNB	MAP7	MYL2	ERGIC3	CMPK2	UBE2L6	HADH	BRCA1	OPHN1	CD40LG	PREB	CAMK4	NAMPT	SUV39H1	PSMB2	TCOF1	FAP	ADM	ECH1	ECHS1	COX5A	GNPDA1	ABCC1	DCXR	LYN	LPHN2	JAG2	MAP2K3	F13B	AHR	ABCG8	ISOC1	TNF	CRISP2	MMP9	RYR1	ELP4
ETS2	LOX	ATF5	FGD6	CSNK1E	TRIM33	INHBE	RRM2B	HMMR	DAP		GPD2	STC2	PDCD4	DNAJB9	CKMT2	DOPEY1	IFITM3	IFI27	LAMB3	GATA3	LDB1	CBLB	SEC31A	RPTOR	CDKN1A	TMPO	HPRT1	MCM5	BGN	PLAUR	PTGES	ACADS	UQCRC2	AKR1A1	FTL	NINJ1	CLTB	DLG1	LUM	BNIP3L	TIMP1	TNFRSF1B	AQP9	YWHAH	CD247	FAM164C	WNT7A	GPR19	SRPRB
F3	GCK	ANXA5	BRCA2	RBPJ	RAB31	CRLF2	SUPT5H	KPNA2	CCND1		ADIG	FAM134B	CALCR	FKBP5	BIN1	VAMP4	RTP4	ADAR	CLDN11	AFAP1L2	DPYSL2	PDP1	GOSR2	CFL1	BHLHE40	UBE2T	MCM6	HK2	SERPINH1	NFKB1	PDK4	CA2	COX6A1	PPFIA4	ATOX1	FOS	BCL2L11	ATP2B4	CXCL6	SLC22A4	CTSL2	NDRG1	ISOC1	EPHX2	IL2	AKAP4	IGFBP3	SLC29A3	PAK3
SDC4	PPFIA4	TP53INP1	PLK1	FZD8	TJP1	TNFRSF1B	RPA3	CDKN3	BTG3		ECHS1	SIAH2	IGFBP4	HERC3	MYH1	VPS4B	STAT2	LY6E	CDH4	IL2RG		C4BPB	SERP1	CDK4	HSPA9	WDR90	NME1	CBX3	FSTL1	INHBA	AHCY	HSD17B10	ATP5D	B3GAT1	STK25	S100A10	LHX2	NIPBL		CLIC2	MMP8	BCL2L1	NR1H4	ABCD1	HLA-DMA	CCNA1	SPP1	EDN2	G6PC2
EGR1	MAFF	CHKA	RASA1	TP53	SLC20A1	CD14	SNAPC5	CDC25A	F2R		QDPR	ZNF185	DNAJC12	PGM3	ENO3	NAPA	SAMD9L	STAT2	IRS1	CD160		PLEK	NFYB	TRAF2	HSPA5	CDK1	SNRPD1	PLK1	POSTN	OSM	COMT	ALDH1A1	COX6C	CHPF2	EGLN2	FBXW7	NFKBIA	PEX14		TRAK2	A2M	GABARAPL1	PEX19	HMGCL	STAT1	CCT6B	ETV1	GPRC5C	PKLR
IL6	DDIT4	GSTM2	NEK2	SKP2	CDK9	PTPN1	SSRP1	H2AFX	SATB1		CS	SLC19A2	TIAM1	HOMER2	FLII	GNAS	LY6E	CXCL9	SORBS3	ADIPOR2		GP9	NHP2	GNGT1	EGLN3	MCM3	EEF1B2	PHB	THY1	TNFSF10	AOX1	ACADVL	ATP5J	G6PD	ERCC2	PLK3	MSX1	MYC		GCLC	MMP10	LIF	NPC1	ACSL5	IRF4	PACRG	CLEC4A	C5	LMO2
TNF	SLC2A3	ACAT2	WASF1	HEY2	ID3	PTPN2	RFC3	CDC25B	BNIP3L		ECH1	SLC1A4	TSPAN13	ELL2	FXYD1	STX7	IFITM2	IL10RA	CLDN8	SLC22A12		PLAUR	DCTN1	UBE2N	LGMN	TOP2A	HSPD1	MCM4	SPP1	TNFSF15	CFB	HSD17B4	NDUFB3	MDH2	SBNO2	XPC	H2AFX	RASA2		KEL	MASP2	TIAM1	HSD17B11	ALDH9A1	SRGN	GSG1	CCND2	FAM164C	SRP14
KDM6B	IGFBP3	AVPR1A	TOP2A	HEY1	NOG	IL1B	RPA2	PLK4	CASP4		SLC25A1	FHL2	CXCL12	UAP1	TPM3	SEC22B	PRIC285	PLA2G4A	EVL	NTNG1		C3	SLC7A5	ADCY2	PNP	MCM6	CAD	CDK4	TNC	IFNGR2	DDAH2	CA4	IDH3B	CHST6	JUNB	AK1	NR4A1	FZD2		RANBP10	FGG	BMPR2	AMACR	DHCR24	INHBA	THEG	TSPAN7	EDAR
NFKB1	NFIL3	PLSCR1	TRIO	HDAC11	ARID4B	CSF1	TCEB3	CDC6	TNFRSF12A		ACADL	BCL2	RAB31	SEC24D	DMD	VPS45	CXCL11	TRIM21	CLDN15	SCUBE1		F2	SSR1	CDKN1B	XBP1	BIRC5	RPL18	DUSP2	TFPI2	EMR1	HGFAC	ADH1C	OGDH	PGLS	PPP2R4	TRIAP1	GLS	BMPR1A		TRIM10	C8A	MAP3K8	CYP46A1	ELOVL5	TLR3	HSPA4L	ITGBL1	KCNMB1
LIF	FOS	CLU	ARHGEF11		IFNGR2	IL18R1	TAF12	CCNF	CREBBP		TOB1	PMAIP1	PKP3	LMAN1	IGFBP3	STX16	TRIM21	USP18	THBS3	CX3CL1		CASP4	EDEM1	VAV3	SLA	CCNB2	PGK1	MYBBP1A	NID2	IL12B	F11	ADH7	NDUFB8	PGAM2	LSP1	BAK1	CDC34	LPAR1		TSPO2	PLAU	RHOB	PEX13	NUDT19	ZAP70	CST8	EMP1	FAM46C
PTX3	RBPJ	ERRFI1	KATNB1		ID2	TNF	TH1L	MCM5	RHOB		GRPEL1	AREG	CYP26B1	PMEPA1	CHRNB1	YKT6	PARP14	PTGS2	PVRL4	CROCC		STX4	EDC4	FGF6	DDX39A	RRM2	DDX18	UTP20	ITGB5	CSF1	CYP26A1	PTS	SURF1	CHST1	NDUFA6	CCND2	MMP14	PRKCA		UROS	ADAM9	MYC	IDH1	PRDX5	CD74	DCC	CDADC1	STAG3
FOSL1	HK1	TRIB3	PRC1		PPP1CA	PF4	TAF13	LMNB1	GPX3		CRAT	OVOL2	FKBP5	INPP4B	SPEG	SNX2	TRIM26	EPSTI1	JAM3			CTSC	EIF2AK3	ECSIT	HSPE1	HMGB2	RPS2	PRMT3	MMP3	CXCL6	MCCC2	MAOA	COX6B1	GPC1	HHEX	APAF1	STK25	MGMT		XK	GSN	S100A1	PEX11A	CTPS	CD40	HSPA1L	KIF5C	KRT4
NR4A1	CITED2	CXCL16	ANLN		SPTBN1	CXCL13	TAF6	E2F3	PDGFRB		GBE1	TSKU	SIAH2	RRP12	FHL1	ARFGEF1	PARP12	C1S	CDH11			USP15	MTHFD2	RALB	ACLY	BUB1B	LDHA	FARSA	VIM	TNFRSF9	SERPINA6	HAO2	NDUFB5	TSTA3	GLRX	PDGFA	PDAP1	PRKCE		SNCA	CAPN2	METTL20	HSD17B6	IDE	TRAF2	GSTM3	TRIB2	SLC25A23
JAG1	ISG20	TNFRSF12A	CDK5RAP2		WWTR1	LTBR	TAF9	KIF15	TSPO		SDPR	ADCY9	ISG20	SEPP1	ACTN3	CLTA	NMI	DDX58	ITGB4			CR1	SRPR	ARF1	SLC7A11	RFC3	RUVBL2	MAP3K6	LOXL1	LYN	GNMT	HSD17B7	NDUFA4	ALG1	NDUFS2	NDRG1	ABCB1	RXRA		MARK3	PLAT	CAPG	EPHX2	SLC23A2	B2M	DNAJB8	SDCCAG8	INSL5
CCL4	GALK1	ACTG1	SMC3		BCAR3	FAS	GTF2A2	CHEK1	CCND2		SCARB1	RASGRP1	TMPRSS3	NDRG1	TCAP	CLN5	RNF31	IL15	RASA1			DUSP6	NOLC1	MKNK1	SSR1	EZH2	RNPS1	LAS1L	FBLN5	ACVR2A	BLVRB	MCEE	NDUFB1	GFPT1	PRNP	RALGDS	BSG	LTBP1		UBAC1	FN1	ST3GAL4	PRDX5	PEX5	BCL3	IL13RA2	PCP4	GP1BA
GCH1	WSB1	JAG1	TUBGCP2		THBS1	IL17RA	VPS37D	UBE2S	XIAP		PEMT	MUC1	SERPINA3	KRT19	MYLK	M6PR	HLA-C	NLRC5	AKT2			SERPINB2	ERN1	CDK1	GLA	CHEK1	EIF2S1	PUS1	COL12A1	LDLR	HACL1	ACAT2	COX4I1	PRPS1	IPCEF1	SERPINB5	SEPW1	LDLR		CA1	CTSH	PENK	PXMP2	BCL10	LTB	CAMK4	CFHR2	MLL2
CCL2	PYGM	LGMN	ESPL1		FNTA	CXCL10	NME1	WHSC1	TIMP1		CHCHD10	KAZN	WFS1	ITGAV	MYL3	SGMS1	CASP1	NMI	TMEM8B			GPD2	FKBP14	PTEN	SQSTM1	SMC4	RANBP1	HSPE1	ELN	BDKRB1	MAOA	AUH	COX7C	GOT1		DGKA	IRF1	RBPMS		CA2	OLR1	IRF4	BBOX1	NR1I2	IFNGR1	LPIN1	ALDH1A2	ABCG4
RCAN1	STC1	FBXO6	MAP1S		HDAC1	IL9R	RNMT	HMGB3	CTNNB1		AK2	SLC27A2	MAPT	B4GALT1	PYGM	USO1	TRIM14	IDO1	LAMA3			CFH	ZBTB17	ARHGDIA	PDK1	MKI67	MCM5	SLC29A2	CDH11	HRH1	KYNU	HPGD	UQCRFS1	MDH1		CYFIP2	RXRB	CACNA1A		BSG	SPARC	CST7	FADS2	TSPO	CCR5	ZC3H14	NR0B2	MYH7
DUSP2	ZNF292	GPX8	ARHGAP27		UBE2D3	STAM2	ERCC2	DBF4	IRF1		APOE	FKBP4	PDLIM3	MAK	LDB3	TSG101	TDRD7	PSMB10	RSU1			FN1	WIPI1	ADRBK1	PSMC2	CDC20	IARS	DCTPP1	COMP	F3	DHPS	FH	SDHC	SLC35A3		KLF4	TFRC	RGS4		FOXO3	RGN	WLS	ALDH9A1	CNBP	CD40LG	COIL	ALDH1A3	BRDT
EHD1	BTG1	PNRC1	DOCK4		LTBP2	TNFRSF12A	POLE4	TACC3	HSPB1		UQCR10	CXCL12	RBBP8	SPDEF	COX6A2	DNM1L	DHX58	CXCL11	ICAM1			CD36	YIF1A	FGF17	PRDX1	PLK1	UBE2E1	SUPV3L1	SPOCK1	BST2	SERPINE1	HMGCS2	ATP6V1F	GALK1		IP6K2	PPIF	COL5A2		KLF1	C8B	TLR7	APOA1	MSH2	HLA-DOA	PHKG2	AMMECR1	PTGFR
IER2	PLIN2	ANTXR2	SAC3D1		RHOA	STAT2	VPS37B	MCM2	ADD1		TANK	TMPRSS3	GJB3	GSR	FABP3	LMAN1	PARP9	ITGB7	CLDN18			CA2	CCL2	DDIT3	SERP1	KIF2C	MYC	SORD	BMP1	PTGIR	SLC6A12	ALAD	COX7A2	EGFR		ADA	CDKN1C	PTPN21		CDC27	LAMP2	IKZF4	OPTN	DHRS3	GLMN	KIF2C	SATB1	KCNN1
REL	CSRP2	MAL2	INCENP			HMOX1	NT5C3	CDKN2C	TIMP2		ANGPTL4	RARA	PRLR	KRT8	MYL7	YIPF6	PNPT1	SAMHD1	GTF2F1			PSMB9	DKC1	IRAK4	TRIB3	DLGAP5	AP3S1	IMP4	IL32	CD55	GCH1	GPD1	SUCLG1	ANGPTL4		TNFSF9	HLA-F	PRKAR2B		KAT2B	C9	GBP4	GSTK1	DIO1	IL6	RPL39L	GUCY1A3	SEPP1
CFLAR	VLDLR	CD9	ARHGAP5			LEPR	SNAPC4	CDKN1B	BTG2		ACO2	IL17RB	SLC1A4	LIFR	ITGB5	ARFIP1	TRIM25	HERC6	TSC1			APOBEC3G	EIF4EBP1	TIAM1	NFIL3	AURKB	RFC4	GRWD1	LAMA3	CALCRL	DHRS7	ACO2	NDUFS6	CITED2		KLK8	CREG1	GJA1		NARF	PROS1	RGS16	ABCG4	SLC25A4	HLA-E	SLC2A5	CSF2	IFI44L
RIPK2	JMJD6	PPARG	GSN			CBL	AAAS	FANCC	TIMP3		FAH	CBFA2T3	FOS	PPAP2A	CHRNA1	ANP32E	PSME1	CMPK2	LAMC2			FCN1	EIF4A1	CDK2	HMGCS1	CDC25A	DUT	UNG	TIMP1	CSF3	PAPSS2	CBR1	NDUFA7	PLOD2		PRKAB1	APOM	BCKDHB		GCLM	CLU	SPP1	ALDH8A1	PRDX1	CD2	PCSK4	APOD	PROP1
NFKBIE	EXT1	GLDC	NET1			CD9	ZNRD1	NASP	LEF1		ACLY	TFF3	PLA2G16	STEAP4	SSPN	TSPAN8	WARS	SAMD9L	NRAP			GZMK	EIF2S1	SFN	GOT1	TRIP13	PSMA4	MPHOSPH10	QSOX1	GPR132	ALDH2	GRHPR	FH	QSOX1		STOM	BMP2	ATP5S		FBXO7	F2RL2	IL13	NR3C2	IDI1	CCL5	AURKA	TOR1AIP2	LGALS7
NR4A3	F3	STX5	LRPPRC			CXCL3	RFC4	STAG1	CASP1		IFNGR1	UGCG	SLC7A5	GUCY1A3	COL3A1	DST	EPSTI1	RTP4	CTNNA1			PDGFB	TATDN2	PRKCB	TPI1	H2AFX	RPS3		TIMP3	IL4R	HSD11B1	ACOT2	NDUFV2	ME2		SOCS1	TGFBRAP1	SERPINE1		H1F0	CD9	SLC29A2	ABCA6	HRAS	FAS	MLLT10	CMKLR1	BMPR1B
PHLDA1	PDK3	STARD4	RABGAP1			TGFB1	ITPA	GINS2	GPX1		SLC5A6	CCND1	SERPINA5	SRP19	KCNH1	SCRN1	UBA7	PTPN2	CD99			CLU	XPOT	GNA14	ELOVL6	HMMR	SNRPG		VCAM1	NLRP3	SLC35B1	G0S2	OXA1L	SPAG4		PLK2	NAT1	AMPH		HEBP1	CFH	NFKBIZ	RETSAT	MVP	FASLG	NOS1	TMEM176B	PDK2
IER5	ANKZF1	CTNNB1	FLNB			MAP3K8	POM121	FBXO5	BCL10		JAGN1	SLC22A5	IMPA2	CCND3	GJA5	SEC31A	PSME2	PARP14	FSCN1			CASP10	LSM4	EIF4E	ASNS	E2F8	PHB2		CYR61	IL15RA	KARS	MDH2	NDUFC1	P4HA2		CASP1	CYB5R1	MIOS		HBD	PREP	IL4R	FADS1	ABCC8	TLR6	ART3	GPR124	DCC
TNFSF9	UGP2	TMEM97	ARAP3			ITGA4	BRF2	POLQ	IGF2R		EPHX2	WFS1	DHCR7	IQGAP2	MYF6	VAMP7	B2M	TNFAIP2	COL16A1			LRP1	CHAC1	CLTC	PSMD14	BRCA1	SSB		EDIL3	ADORA2B	CA2	HSP90AA1	UQCR11	GAPDHS		RCHY1	RRAD	CITED2		NUDT4	LTA4H	MXD1	PECR	CLN6	PF4	CCNB2	LAPTM5	SNCB
GEM	ALDOB	FAM129A	FGD4			CD38	RFC5	EZH2	CDC25B		IDH3G	PTGES	MYOF	RAB4A	MYH2	SCAMP3	TRIM5	IFITM2	GNAI2			CTSD	STC2	TSC2	PSMA4	MYBL2	EIF4H		CALD1	GCH1	LPIN2	BCKDHB	NDUFA5	ENO2		PCNA	POLE3	COL1A2		FBXO9	GP9	CSF2	PEX12	CAT	TGFB2	NPHP1	CD37	COL2A1
GADD45A	STC2	PDK3	ABR			JUN	SAC3D1	RAD21	AIFM3		GPX3	WWC1	CDH1	SLC26A2	MAPK12	AP2B1	C1S	PLSCR1	TGFBI			S100A9	PDIA5	FGF22	PPA1	POLD1	SRSF3		MAGEE1	OLR1	CAT	UROS	CS	GOT2		RPS27L	IL6	INSIG1		RAD23A	DUSP14	FAH	CAT	ACSL4	CD79A	CLGN	CAB39L	UGT2B17
CXCL10	ERRFI1	PLAUR	CENPJ			SOCS1	CLP1	STMN1	CD38		ELMOD3	WISP2	EMP2	SMS	PGAM2	RAB22A	LAP3	SOCS1	MPP5			WAS	OBFC2A	PPP1CA	HPRT1	RACGAP1	CCT4		FBLN1	PTGER2	CYP2S1	YWHAH	ATP6V1G1	EXT2		RB1	YKT6	FYN		CROCCP2	CTSK	CTSZ	GNMT	IDH2	INHBB	MAST2	CIDEA	PPYR1
PLK2	ENO3	SEMA3B	NCK1			ACVRL1	NME4	SUV39H1	PPP3R1		ORM1	MYC	OVOL2	ZMIZ1	MYOG	AP3B1	LAMP3	CASP1	JUP			BRPF3	LSM1	DUSP3	AURKA	CKS1B	TFDP1		SGCB	CSF3R	RAP1GAP	LDHA	ATP5F1	SLC25A13		PPP1R15A	ACAA1	WDR37		TMCC2	GDA	ITGAE	ABCA9	ABCC5	ELANE	MTOR	ZNF639	DLK2
BHLHE40	PNRC1	GNAI1	CENPF			PIM1	PRIM1	PRIM2	HGF		RETSAT	ITPK1	DLG5	SGK1	MYH4	TPD52	GBP4	ICAM1	ACTN2			PLAT	SDAD1	HSP90B1	HMGCR	KPNA2	EIF2S2		ECM1	MYC	FBP1	CRYZ	HCCS	HMMR		POLH	CLCN2	ZMIZ1		BLVRA	CASP9	MUC1	ACSL5	SOD2	SPI1	CDKN3	IL1B	WNT16
EGR2	HMOX1	ABCA2	KIF20B			TNFRSF21	VPS28	E2F1	CLU		ESRRA	TMEM164	SOX3	MERTK	AEBP1	ATP6V1H	NCOA7	WARS	INSIG1			CDA	EIF4A2	IL4	GAPDH	MSH2	CDK4		LAMA2	RELA	RBP4	RDH16	HADHB	PDK3		RAB40C	EIF2C2	PMP22		GATA1	APOC1	MAPKAPK2	LONP2	SLC35B2	MAP3K7	ZNRF4	GYPC	SLC6A14
SOCS3	PGF	ATXN2	WASF2			PIK3R5	TSG101	CHAF1A	ATF3		HIBCH	ARL3	CHPT1	HPGD	HBEGF	GBF1	TMEM140	PSME1	LAYN			MT3	EIF4E	STAT2	DHFR	CDKN3	SNRPD3		FSTL3	TNFAIP6	GCKR	INMT	ATP5H	CXCR4		ERCC5	SOD2	CDON		RBM38	CRIP2	TNFRSF21	DHCR24	FDPS	IL15	AGFG1	LY96	ITGB1BP2
SLC2A6	GAPDHS	NFIL3	MYH10			GRB2	USP11	NOLC1	LGALS3		SUCLG1	MED13L	KLK10	ANKH	MEF2C	KRT18	CD74	ISG20	PFN1			CASP7	IARS	SLA	DHCR7	ATAD2	PSMD1		TPM2	IL7R	CDA	UGDH	PDHA1	GPC4		CDH13	PPP1R2	PIK3R3		PRDX2	KLK8	NT5E	ABCA8	ALB	CTSS	SNAP91	FLT4	SLC12A3
PTGER4	CHST2	ALCAM	CENPE			IRF1	TAF1C	GSPT1	LUM		STAT5A	SEMA3B	ELOVL5	GNAI3	NOS1	CAV2	GMPR	IRF2	CNN2			PRSS36	DDX10	EGFR	IMMT	RPA1	GNB2L1		INHBA	IL18	MTHFD1	GSTZ1	NDUFA8	ECD		DDIT3	RHOB	NOTCH2		RNF123	SERPINC1	FLT3LG	PFKM	FADS1	CD47	PSMG1	SPON1	YBX2
DUSP5	TMEM45A	FABP5	CYTH2			DNTT	TARBP2	BUB3	LMNA		ITGA7	KRT18	RAPGEFL1	SRF	CNN3	ATP1A1	PSMA3	TRIM14	TAOK2			PFN1	GEMIN4	PLA2G12A	UCHL5	STMN1	GOT2		DAB2	GABBR1	ADH7	IDH3B	DLD	GNE		TGFB1	RET	SYNJ2		MINPP1	ANXA1	CCND2	DIO1	STS	PRF1	CHFR	BMP2	CKM
SERPINB2	BCAN	S100A11	MID1			CSF2	POLH	SMC1A	GADD45B		MRAP	SLC16A1	JAK2	SLC38A2	IGFBP7	BNIP3	PROCR	FCGR1A	AMIGO2			GZMB	TARS	MAPK10	YKT6	TIPIN	PABPC4		EMP3	CD82	DHRS1	MDH1	OPA1	B4GALT2		FUCA1	PDLIM3	SMAD7		TNS1	ITIH1	TRAF1	RXRA	SMARCC1	IL12RB1	TNP2	PLEK2	CPB1
NFIL3	ATF3	CPEB2	KLC1			IL2RA	CETN2	ILF3	CDK2		PLIN2	TJP3	SLC26A2	HMGCS1	CACNA1H	ZW10	IL7	42795	MDK			RNF4	ALDH18A1	CALR	INSIG1	TK1	CCT5		BASP1	TNFSF9	VNN1	CRAT	SLC25A11	FUT8		HIST3H2A	EPCAM	MAP1B		CTSE	PRSS23	LCLAT1	FDXR	ITGB1BP1	LCP2	EZH2	IGF2	MAGIX
SERPINE1	CAV1		MARK4			PTPN11	POLD1	CDC7	IFNB1		CYC1	SLC26A2	SLC22A5	ARID5B	GSN	GALC	IFI30	SOCS3	INPPL1			ZEB1	DDIT4	THEM4	SQLE	CDCA8	PRPS2		ITGA5	NMUR1	CNDP2	ETFDH	ATP5I	MIOX		TP63	DNAJA1	PAPD7		EPB49	FBN1	IL3RA	TTR	SIAH1	SOCS1	HBZ	NR1H4	ARHGDIG
TRIB1	AMPD3		ARL8A			IL12RB1	CANT1	INCENP	RETSAT		ALDH2	FAIM3	ITPK1	CDC14B	CACNG1	ADAM10	IRF2	JAK2	CLDN6			CASP5	HSPA9	RIT1	IGFBP5	ESPL1	ACP1		MGP	IL2RB	SLC6A6	CD36	PDHB	VCAN		HSPA4L	SULT1A1	PTEN		HDGF	MST1	CYFIP1	KLF1	SLC25A19	CDKN2A	ARL4A	SNAP25	CALML5
TIPARP	GPC3		CEP57			CCR1	PDE4B	CKS1B	SMAD7		RNF11	SULT2B1	PCP4	TNFAIP8	PPFIA4	RAB5A	CSF1	HLA-DMA	ARPC2			IRF1	SEC11A	MKNK2	IFI30	NCAPD2	PRPF31		VEGFA	TLR1	FETUB	ECI2	ATP5J2	GPC3		EPHX1	CHKA	DYRK1A		XPO7	F3	BCL2	SLC29A1	CDK7	STAT4	SLC12A2	ACE	KRT1
RELA	NDST1		UXT			CNTFR	DGCR8	EXO1	SOD1		ALDOA	SNX24	PAPSS2	XRCC5	MB	GOLGA4	IL15	PARP12	SRC			PGCP	EIF4A3	PPP2R1B	CYP51A1	RANBP1	CCT2		CXCL1	LPAR1	CROT	SDHD	NDUFB7	B3GALT6		ABHD4	CYP1A1	NEK7		MKRN1	KLF7	FGL2	BCAR3	RXRG	CD7	BRAF	PRRX1	MTHFR
BIRC2	IRS2		ARHGAP4			PLA2G2A	RAD51	H2AFZ	PTK2		SULT1A1	TFAP2C	NAB2	GPD1L	SPHK1	SEC24D	CNP	TNFAIP6	PBX2			CDK5R1	POP4	CAB39L	FGL2	MRE11A	KARS		WNT5A	IRAK2	GAD1	ACSL5	IDH2	HSPA5		H2AFJ	ATP6V1F	SPOP		SMOX	CTSE	PRNP	LCK	ALDH1A1	HLA-DOB	VDAC3	C3AR1	ABCB11
CXCL6	SAP30		CDC42EP4			CXCL9	SURF1	TFDP1	ENO2		DDT	TTC39A	FAM102A	ACTN1	SCHIP1	AP1G1	FAM46A	TRIM26	MAPK14			ATOX1	ERO1L	ARPC3	ENO1	KIF4A	DEK		SDC1	RIPK2	AKR1C2	HSDL2	MTX2	ME1		TRAF4	CDO1	F3		TFDP2	ITGB3	N6AMT2	PEX11G	UGT2B17	CD8A	POMC	TRAF1	MYOT
LITAF	GAA		SASS6			CD44	PNP	CCND1	HMOX1		SDHB	GJA1	BCL2	RPS6KA3	MEF2D	MAPK1	IL4R	VCAM1	MAP4K2			PIK3CA	CEBPG	PITX2	IDI1	LMNB1	EIF4G2		PLOD2	MMP14	DAK	HMGCS1	VDAC3	ADORA2B		CTSF	ALDOA	ERBB2		MXI1	CAPN5	PUS1	SLCO1A2	CADM1	ICAM1	IFT88	TLR8	CELSR2
TNFAIP6	SDC4		LATS1			IL7	ADA	KPNB1	IER3		CD151	PRSS23	LSR	TSC22D1	SMTN	GOSR2	FTSJD2	CD274	PTEN			TMPRSS6	BAG3	NCK1	CYB5B	KIF22	XPOT		PCOLCE	P2RX7	IGF1	SDHC	MDH1	UGP2		IER5	NPTXR	GRK5		HBB	CSRP1	ITGAV	ALDH1A1	SERPINA6	CCL4	TKTL1	ID2	KLK7
CD44	STBD1		OPHN1			CXCL11	NME3	HN1	BCL2L10		SLC27A1	OLFM1	CACNA2D2	PDLIM5	CDKN1A	RPS6KA3	CD47	CIITA	CALB2			CPM	KDELR3	IL2RG	SHMT2	UNG	SRM		GREM1	SLC11A2	SSR3	CD1D	ATP5G2	MIF		TAX1BP3	EIF2S3	DUSP1		MOSPD1	KLKB1	NCS1	SULT1B1	CLN8	GZMB	NEK2	TMEM100	THNSL2
INHBA	IER3		WASL			CCL7	GTF3C5	LBR	CD2		BCKDHA	RAPGEFL1	CA2	TMEM50A	GAA	STAM	LPAR6	NAMPT	CNTN1			RCE1	CEBPB	PFN1	TXNRD1	SMC1A	UBA2		ITGB1	SELL	GABARAPL1	GCDH	IMMT	NANP		TSC22D1	CNP	VLDLR		SLC25A37	MSRB2	DCPS	NR1I2	RDH11	CSF1	STAM2	PLAUR	CHRNG
PLAU	PKLR		MAP3K11			LTB	NT5C	HUS1	GCH1		C3	ASB13	ASCL1	ADAMTS1	TPD52L1	ABCA1	MOV10	SELP	TSPAN4			CALM1	CNOT2	FASLG	G6PD	CCNE1	KPNB1		COL5A3	P2RY2	TMBIM6	GPD2	MDH2	ZNF292		RGS16	GRINA	CAV1		SLC30A1	TFPI2	AMACR	GC	CTBP1	IL11	HIST1H1T	GADD45G	NR4A2
MYC	IGFBP1		SOS1			IL17RB	AK1	KIF20B	MMP2		LEP	TIPARP	ACOX2	NCOA4	HSPB2	SNAP23	CASP8	GPR18	VCAN			DOCK9	SHC1	NOD1	SLC9A3R1	CDCA3	PSMA7		RHOB	ABCA1	CD36	ALDH3A1	SLC25A3	STC2		HRAS	BID	COL11A1		ABCB6	MMP3	FAM126B	ABCA4	HSD11B2	STAB1	GMCL1	CBX8	CD40LG
TNFRSF9	PLAUR		ABL1			CD36	GTF2H1	TOP1	VDAC2		ADCY6	ABCA3	CISH	AKAP12	SGCA	SOD1	TXNIP	FPR1	CDH8			KYNU	SPCS3	DAPP1	RAB1A	ASF1B	TRA2B		HTRA1	FFAR2	CES1	SLC22A5	ATP6V1D	TPST1		PVT1	POLG2	CDC42BPA		SLC6A8	MEP1A	PTH1R	SLC35B2	TTR	IL2RA	MTNR1A	SCN1B	KRT13
SGK1	PRKCDBP		TIAM1				HCLS1	PDS5B	TAP1		ELOVL6	FRK	GLA	SCD	BDKRB2	GLA	SLC25A28	PRIC285	ATP1A3			RASGRP1	H2AFX	UBE2D3	EBP	POLA2	COX5A		FGF2	PROK2	SHMT2	PDHB	VDAC2	PGM2		ZFP36L1	IL6ST	CDK13		TFRC	GP1BA	ODC1	SLC23A1	ERCC3	NLRP3	RFC4	PTBP2	GP2
TNIP1	WISP2		KIF1B				APRT	SRSF1	PLAT		LTC4S	DHRS2	PTGES	PTK2B	COX7A1	ATP6V1B1	SELL	PSME2	EPB41L2			USP14	SLC1A4	CAB39	PNO1	TIMELESS	PA2G4		SNTB1	GNAI3	TMEM176B	TDO2	ACADM	GYS1		SDC1	HYAL2	SFMBT1		RCL1	APOA1	IGF1R	NUDT12	ATXN1	CCND3	DBF4	NAP1L2	CD207
NAMPT	LARGE		ITSN1				ERCC8	STIL	IFNGR1		SPARCL1	AQP3	PERP	CDK6	COL4A2	STX12	TRAFD1	SERPING1	MYL9			LCP2	RPS14	AP2M1	PIK3R3	HELLS	PCBP1		GADD45A	TACR1	GSTT2	FASN	COX7A2L	TKTL1		WRAP73	FOSB	ADORA2B		TOP1	SERPINA1	PTCH1	ABCA1	SULT2B1	EIF3A	PRKAR2A	AKAP12	CCR8
FOSL2	CCRN4L		SHROOM1				IMPDH2	ABL1	APP		FAM82A2	KCNK15	OPN3	ADRM1	PLXNB2	CD63	BATF2	CCL5	SPEG			GP1BA	NPM1	MAP3K7	ACTR3	UBE2S	HNRNPA1		MEST	SLC7A1	PLG	NBN	TIMM17A	TGFA		RAP2B	MGAT1	BHLHE40		EPOR	TF	ENO3	PAOX	CRABP2	SIT1	TTK	PLAT	ZBTB16
PNRC1	S100A4		NCK2				POLB	DTYMK	BRCA1		MTCH2	TGIF2	KRT13	H1F0	CTF1	TOM1L1	RIPK2	RNF31	ADRA1B			KIF2A	CNOT6	PRKAG1	LDLR	PRKDC	CCNA2		LRRC15	CDKN1A	HMOX1	PSME1	ATP6V1E1	CHST2		ADCK3	NKX2-5	COL3A1		TNRC6B	PEF1	CD81	SLC22A18	CRABP1	IFNAR2	DMC1	SCG3	PARK2
ID2	RRAGD		DLGAP5				SDCBP	CDC27	ROCK1		ANKRD57	FOXC1	HSPB8	HSD17B14	COL15A1	SSPN	CCRL2	SOD2	SYK			GNB4	CKS1B	CSNK2B	SLC2A3	RAN	PPIA		TNFRSF11B	CYBB	SPINT2	PPARA	NDUFA3	PHKA2		PLXNB2	PPAT	KCNMA1		ACSL6	GNG12	MAFF	DIO2	TOP2A	HDAC9	NCAPH	ANO1	CPA2
CD69	ZFP36		BCR				SF3A3	BARD1	PSEN1		SLC1A5	ELF3	UGDH	VAPA	KCNH2	ARFGAP3	NUB1	TRIM25	CADM2			LCK	PSAT1	PRKAA2	UBE2D3	USP1	EIF3J		CD59	TIMP1	ALDH3A1	NCAPH2	SLC25A6	STMN1		HEXIM1	FURIN	SYNE1		GAPVD1	SIRT2	EMP1	RBP1	SCGB1A1	CARTPT	PEBP1	IL1RL2	MEFV
IL7R	EGFR		RANBP9				DAD1	ATF5	DCN		CMPK1	REEP1	CLIC3	CCND1	AGRN	RAB9A	OGFR	LAP3	ALOX15B			OLR1	EIF4G1	ATF1	ELOVL5	SPAG5	ORC2		ACTA2	HBEGF	GSR	BPHL	IDH3G	GALE		PROCR	MRPL23	IGF1R		MGST3	COMP	CDKN1C	SLC23A2	ERCC1	TRAT1	CHRM4	CXCL10	CCNA1
EFNA1	EDN2		EPB41L2				UPF3B	CDC45	PSEN2		REEP6	PEX11A	KLK11	XRCC6	MYO1C	CTSC	FAM125A	PSMA3	CX3CL1			PREP	YWHAZ	SLC2A1	CACYBP	POLD3	PSMA2		EFEMP2	SCARF1	ABHD6	ODC1	ACADVL	MET		SPHK1	HTR7	CELF2		SLC30A10	HTRA1	CAPN3	ATXN1	DLG4	CCL22	TOPBP1	ATG10	SLC38A3
PHLDA2	IDS		42987				GUK1	ODC1	SOD2		NDUFA5	PODXL	PLAC1	MYL12A	SIRT2		ELF1	RNF213	MYH10			SEPX1	SLC30A5	PIN1	EDEM1	DUT	SYNCRIP		MATN2	EBI3	XDH	CA6	ETFA	LCT		NOL8	CXCL2	MTA1		CAT	MAFF	IL1R2	GCLM	PABPC1	APBB1	SCG5	YRDC	KLK8
PFKFB3	CDKN1A		KATNA1				TP53	XPO1	BMF		FZD4	KLF4	ABHD2	UBE2I	SGCD			PELI1	DMP1			LTA4H	SKIV2L2	TNFRSF1A	ATP6V1D	TACC3	HDAC2		PCOLCE2	NFKBIA	PPARD	DLD	TIMM9	IRS2		DEF6	KLHDC3	EFEMP1		BCAM	LRP1	SYT11	NEDD4	FABP6	FYB	NEFH	HDAC9	CYP39A1
CCL5	RORA		TUBD1				ADRM1	SFPQ	EREG		DRAM2	BAG1	SCARB1	PTPN21	SORBS1			CFB	CDSN			ZFPM2	KIF5B	LCK	TES	KIF18B	LSM2		SERPINE2	SRI	ELOVL5	HCCS	IDH3A	POLR3K		SP1	PRPF3	LAMC1		HBZ	PF4	TTC39B	RXRG	ABCB9	IL1B	MAP7	PEG3	KCNQ2
YRDC	DUSP1		TPX2				SEC61A1	TMPO	KRT18		MGST3	CELSR1	DCXR	AKT1	VIPR1			CD86	MAPK13			LYN	DCP1A	RPS6KA3	TM7SF2	CDC25B	VBP1		GPC1	SLC7A2	CYP4F2	EPHX1	TIMM8B	B4GALT1		JAG2	DNAJB1	PHF3		DARC	PGCP	ANXA4	AR	CACNA1B	TIMP1	BUB1	SEMA3B	SLC30A3
IFNGR2	MIF		KIF3C				POLA2	PML	TGFB2		ATP1B3	PLA2G16	CCND1	PA2G4	FGF2			TXNIP	MYL12B			ACTN2	IFIT1	NGF	PSMA3	SRSF1	PSMA6		ABI3BP	CCL17	RETSAT	DLST	ATP6AP1	EFNA3		CCP110	AP2S1	SCAF8		PSMD9	MMP15	BATF	BMP6	SEMA3C	RPS19	42982	TNNT2	CHST2
SQSTM1	PPP1R3C		SHROOM2				FEN1	BRCA2	RELA		RETN	SLC7A5	SFN		FKBP1B			HLA-DQA1	RAC2			SIRT6	IMP3	CXCR4	ITGB2	GINS3	CNBP		FUCA1	TLR3	CYFIP2	FMO1	TIMM13	LHX9		DRAM1	PSMC3	VAV2		ISCA1	RABIF	P4HA1	SERPINA6	VPS4B	JAK2	PGS1	LIF	ITIH3
BTG3	DPYSL4		TUBGCP6				ZNF707	CTCF	WEE1		STOM	MPPED2	ABCA3		TEAD4			GCH1	FBN1			APOC1	SPCS1	ACACA	AK4	NOLC1	CDK2		SLIT3	APLNR	PINK1	AOC3	UQCRQ	KDELR3		RPL18	TST	PIAS3		PDZK1IP1	HRG	GPR65	LIPE	CEL	KRT1	NPY5R	CFB	EGF
GADD45B	KDELR3		SPTAN1				NUDT9	CASC5	RARA		ESYT1	TIAM1	SULT2B1		CASQ1			PNP	DSC1			PRKCD	DNAJA4	SMAD2	SLC1A4	SLBP	TARDBP		LAMA1	OSMR	GCLC	UROD	ABCB7	TALDO1		CEBPA	SIGMAR1	ACVR2A		HIST1H4C	C8G	SLC1A5	EFHC1	ESR2	WARS	TSN	BTC	MSH5
KYNU	DTNA		PALLD				PDE6G	SETD8	CD14		GHITM	CLDN7	CCNA1		KLF5			CCL7	CD34			ITGAM	VEGFA	PAK4	TOMM40	CHEK2	NOLC1		PMEPA1	IL10RA	ESR1	CPT1A	VDAC1	DPYSL4		KIF13B	GCH1	NRP1		ICAM4	APOC2	IGF2R	IDH2		IFNGR2	CDK1	PPP1R15A	TEX15
G0S2	ADORA2B		ARFIP2				TYMS	SLC38A1	CD69		DNAJC15	MYOF	STIL		PDLIM7			PTPN6	ICAM4			DGKH	TTC37		SLC6A6	SPC25	GSPT1		COL8A2	PSEN1	PMM1	SETD8	ATP5L	VLDLR		MXD1	BTG2	MRPS31		MOCOS	SERPINB2	CKAP4	IDI1		CCR2	SHE	PTPRR	CLPS
BTG1	HS3ST1		KNTC1				BCAP31	TRA2B	PEA15		GADD45A	RBBP8	MICB		AK1			SPPL2A	MSN			LTF	TUBB2A		PPIA	BARD1	HNRNPA2B1		FBN2	GPR183	TDO2	UBE2L6	PHB2	CD44		TRAFD1	CEBPG	CYR61		ADD1	RAPGEF3	CCR4	CH25H		EREG	PARP2	CCL20	ENTPD7
MCL1	PTRF		HOOK3				DDB1	MYBL2	DNAJC3		VEGFB	OLFML3	ZFP36		TAGLN			IL4R	MAPK11			MAFF	FUS		ADD3	DCTPP1	ETF1		IGFBP2	ATP2B1	MT2A	MIF	DECR1	AGL		OSGIN1	TARS	DAB2		FTCD	CPN1	CD44	ABCA5		MMP9	TNNI3	ARG1	CLSTN3
VEGFA	NR3C1		SUN2				NFX1	TROAP	CASP2		PFKL	GFRA1	CAV1		RIT1			PNPT1	ACTC1			KCNIP2	EXOSC10		ME1	SMC3	RPL6		PFN2	TNFRSF1B	ATP2A2	SUCLG2	SUCLA2	SOX9		ANKRA2	UROD	MAGI2		ADD2	ITGA2	P2RX4	SULT2B1		EGFR	PCSK1N	RETN	CYP11B2
MAP2K3	KLF6		MID1IP1				RAD52	PAPD7	CTH		COQ3	FARP1	NBL1		MEF2A			DHX58	TRAF1			PCLO	EEF2		CCNF	RNASEH2A	TOMM70A		SDC4	BEST1	DDT	CPOX	GOT2	DDIT4		HBEGF	PARP2	ANXA4		BMP2K	RAC1	GATA1	SOAT2		IL16	IDE	KLF4	CLDN16
CDKN1A	GPC4		DLG1				ADCY6	CUL3	PLCB2		OBFC2A	SVIL	CD44		ANKRD2			BTG1	CRB3			DOCK10	EXOC2		SLC37A4	DEK	PTGES3		CD44	GPC3	FABP1	SMS	DLAT	IDUA		RAD51C	BTG3	COL1A1		BPGM	DPP4	KLF6	TFCP2L1		CFP	GPR182	MMD	HSD11B2
CYR61	CYR61		FLNA				ARL6IP1	MAPK14	BMP2		CYP4B1	TGM2	HR		AKT2			CASP8	ITGA2			SH2B3	PAIP1		ALDOA	CENPM	PSMA1		GADD45B	SCN1B	ACP2	CBR3	ATP6V1H	CASP6		ITGB4	DLG4	SCHIP1		CLCN3	WDR1	ARL4A	NR0B2		WAS	RAD17	PDCD1LG2	ADCK3
TANK	TNFAIP3		ARHGAP10				DGUOK	HIST1H2BK	HMGB2		PPM1B	DEPTOR	HOMER2		LAMA2			IFI30	ITGA10			RABIF	BANF1		BTG2	RAD51C	PSMC6		IL8	ACVR1B	ABCD2	NTHL1	NDUFB2	GLCE		TRIB3	CHRNA5	DDAH1		E2F2	THBS1	HOPX			ITGAL	TLE4	HIST1H2BB	HNF1A
IFIT2	CA12		CDC42BPA				POLL	MYC	LPPR4		ARAF	CYP26B1	BTG3		ST5			CCL2	BAIAP2			SRC			UFM1	CBX5	CTPS		GLIPR1	HPN	G6PC	CIDEA	FDX1	COPB2		INHBB	NPTX2	PDGFRB		HAGH	FYN	GPR83			KLRD1	ACE	HOXD11	FGF22
IL18	HEXA		ARHGEF12				SMAD5	AMD1	H1F0		PTRF	PAPSS2	GAL		IFRD1			FGL2	ARHGEF6			HPCAL4			CCNG1	RFC1	HSPE1		ANPEP	SEMA4D	DDC	IDI1	HADHA	DSC2		VAMP8	ATP6V1C1	ATRX		JHDM1D	PDGFB	ITGA6			RARS	SIRT1	TRIB1	TFCP2L1
TUBB2A	BGN		MARCKS				MPG	CBX1	TGFBR3		COL4A1	SLC1A1	ETFB		NCAM1			CASP7	ACTG1			CD46			STC1	POLD2	FAM120A		LEPRE1	KLF6	ACOX3	AADAT	ATP6V1C1	HS6ST2		VWA5A	AQP3	KALRN		OPTN	SH2B2	CD48			TLR2	HTR5A	F2RL1	OXT
IRF1	PPP1R15A		NIN				DUT	CHMP1A	EBP		IMMT	DLC1	BAG1		SYNGR2			SECTM1	MVD			PRDM4			NMT1	DSCC1	PPM1G		VEGFC	CD48	SAR1B	REEP6	MAOB	CDK1		ABAT	PLCL1	TGFBR2		RAP1GAP	PECAM1	CCDC164			CCND2	TALDO1	ANXA10	KCND1
FOS	PGM2		PCM1				POLA1	DKC1	TXNIP		DHRS7	JAK2	FRK		PICK1			IL15RA	PDZD3			GNAI3			PSMC6	ILF3	HNRNPD		MMP14	CXCR6	FBLN1	HSPH1	NDUFB4	PLOD1		CTSD	NUPL1	PTGFR		CTNS	MMP7	SELP			IL2RG	NF2	TSPAN13	H2AFY2
OLR1	PIM1		RALBP1				EIF2C4	YTHDC1	ANKH		COL15A1	AFF1	SLC16A1		COL6A3			CD40	ADAM9			C9			FDXR	DEPDC1	SERBP1		SGCD	SLC1A2	ADH5	APEX1	UQCR10	SDC2		PTPRE	TYRO3	ATP2C1		NFE2L1	DUSP6	GLIPR2			ETS1	CLVS1	MTMR10	NRIP2
RHOB	PRDX5		EZR				RALA	CCNT1	RHOT2		NMT1	KLK10	AFF1		CRAT			TRAFD1	PCDH1			PPP2CB			RRM2	DCK	CSTF2		PLOD1	GP1BA	CRP	NSDHL	ETFDH	GMPPB		HINT1	HMOX1	ARHGEF9		ELL2	CPB2	SMPDL3A			ITK	CNIH2	CFH	RGS11
AREG	NAGK		SSH2				ZWINT	TGFB1	CYLD		COQ5	P2RY2	TFAP2C		DMPK			HLA-DRB1	SLIT2			IRF2			DHCR24	CDKN2C	PRDX4		MATN3	TAPBP	ABCC2	ADIPOR2	GPX4	PAXIP1		ALOX15B	RPN1	NFKB1		SLC2A1	S100A13	PLSCR1			NCR1	GRM8	LAT2	CPEB3
NINJ1	CDKN1B		CDK1				BCAM	ATRX	GSTM1		LAMA4	BLVRB	IGSF1		MYH11			GBP6	KRT31			FYN			PSMC4	MYC	EIF4E		MYL9	RGS16	ETS2	ACSL4	PDHX	NSDHL		VDR	BTG1	MGLL		PIGQ	CFD	FURIN			MAP4K1	STRBP	ERO1L	TG
ZBTB10	BRS3		RAB3GAP1				TK2	LIG3	GSR		AGPAT3	CISH	HPRT1		MYH9			LCP2	SGCE			JAK2			CTH	TCF19	ODC1		SLC6A8	SLAMF1	NPC1	ACSS1	MFN2	RARS		IKBKAP	FMO1	FBLN5		KLF3	DCT	SERPINB6			CCL19	ADCYAP1	RELN	PTPRJ
PPAP2B	TKTL1		FARP1				CSTF3	NUP50	BGN		BAZ2A	GLA	CDC6		IGF1			HLA-G	GNAI1			PLA2G4A			PSME3	RAD1	USP1		CALU	LCK	CASP6	ENO3	AIFM1	SLC16A3		WWP1	ASNS	PDLIM5		EPB41	LEFTY2	TNFSF11			PSMB10	ALOX15	KCNN4	NUDT11
KLF4	MT1E		SYNPO				GTF2H5	SLC7A5	BCL2L1		IDH3A	ADD3	FARP1		CKB			MT2A	PIK3CB			PRCP			CFP	LBR	RPL22		PRRX1	HIF1A	BPHL	IDH3G	ACAA2	GLRX		NUPR1	DDX21	MAPK14		LAMP2	ANG	GPX4			RPL39	MEP1B	TMEM176A	FSHB
CXCL11	ATP7A		RHOF				HPRT1	RBL1	GNA15		LIFR	PDLIM3	AMFR		FST			RIPK1	NLGN2			USP8			POLR3G	NBN	HNRNPA3		TNFRSF12A	AHR	IL1R1	LGALS1	ETFB	SRD5A3		TCN2	KCNH2	SRI		TMEM9B	C1QA	LRRC8C			EIF3J	SCG3	MAP4K1	IDUA
SAT1	MT2A		ECT2				BOLA2	NUMA1	MGMT		PREB	FAM63A	DHRS2		GPX3			KLRK1	YWHAH			RHOG			ACACA	PTTG1	NCBP1		FMOD	NMI	ENTPD5	METAP1	COX11	SDC3		CDKN2AIP	COL2A1	INPP4B		EZH1	HMGCS2	CCNE1			ABCE1	GFI1	PTGS2	TNNI3
CSF1	SDC3		EPB41				GPX4	RAD54L	PPT1		PTGER3	FOS	NXT1		PVALB			UPP1	PARVA			L3MBTL4			QDPR	UBR7	RPLP0		ID2	RHOG	TNFRSF1A	ALDOA	ECHS1	HDLBP		POM121	MAOA	IGFBP5		CTSB	ISCU	CASP3			CD8B	ELOVL3	IL33	GTF3C5
GPR183	TIPARP		RAPGEF6				BRP44	EFNA5	F2		GPHN	KRT8	S100A9		PTP4A3			PSMB2	CRAT			LAMP2			MCM2	POLE4	ABCE1		GEM	TPBG	IGFBP4	ACSM3	PMPCA	COL5A1		ZNF365	TCHH	ITGB3		ATG4A	PLEK	SH3BGRL2			F2	IL12RB2	MAFB	TFF2
PMEPA1	PKP1		KIF22				CDA	PRPF4B	IL6		PFKFB3	SLC37A1	SLC29A1		ITGB1			TDRD7	ADAMTS5			PIM1			PSMD12	TUBG1	EIF1AX		PLAUR	NPFFR2	PYCR1	LTC4S	ATP6V0B	CLDN9		EPHA2	CYB5B	BDNF		MFHAS1	APOC3	SNX9			ELF4	DMRT1	LCP1	SSTR4
PTPRE	ANXA2		PCGF5				THOC4	UCK2	SC5DL		GPX4	B4GALT1	SLC24A3		HSPB8			HIF1A	AMH			CXCL1			SC5DL	CTCF	YWHAE		MYLK	IFNAR1	CSAD	D2HGDH	SLC25A5	TFF3		JUN	HSPA13	ID1		MYL4	P2RY1	PLEC			LY86	GAD1	NGF	COPZ2
TLR2	PGAM2		STAU1				MRPL40	ARID4A	IFITM3		SSPN	CALCR	FOXC1		ACHE			EIF4E3	EGFR			F3			CANX	RQCD1	MCM7		TGFB1	ICOSLG	VTN	ADSL	DLST	STC1		MAPKAPK3	GGH	SNAI2		RNF19A	USP11	BMP2			FCGR2B	CFTR	CA2	PDCD1
CXCR7	DDIT3		ARHGDIA				NPR2	CUL1	RNASEL		SQRDL	ESRP2	KIF20A		CHRNG			VAMP8	ICAM2			GNAI2			RPN1	TUBB	YWHAQ		SFRP1	RASGRP1	ID2	SUCLA2	COX15	KIF20A		SLC7A11	GAL	SCN8A		BTG2	TIMP3	ICOS			GBP2	JAM3	SERPINA3	SLC16A7
KLF10	PRKCA		AURKA				REV3L	UPF1	EMP1		MOSC2	IGF1R	TOB1		PKIA			PFKP	CD274			CASP9			HSPA4	SMC6	VDAC1		PLOD3	IFITM1	ETFDH	SDHA	CYB5A	GYS2		SERTAD3	NTRK3	ATP2B1		SLC11A2	ACOX2	ALCAM			PRKCG	IP6K1	RGS16	KCNE2
MARCKS	SLC37A4		FBXO5				EDF1	DR1	CAV1		DLD	NBL1	FDFT1		NAV2			CD38	CDH15			XPNPEP1			FAM129A	ZW10	SMARCC1		IL6	KCNJ2	HRG	XIST	ALAS1	SLC37A4		IRAK1	PPT1	FHL2		ADIPOR1	HNF4A	LTB			RPS9	HOXB1	CTSS	MFSD6
LAMB3	CXCR4		NUSAP1				DFNA5	MNAT1	DNM1L		ITIH5	SFN	DNAJC1		HDAC5			ZBP1	SHC1			PLSCR1			TBK1	PA2G4	SNRPD2		APLP1	LY6E	TYR	OSTC	SLC25A4	LHPP		ABCC5	FGF18	KIT		ASNS	S100A1	ENPP1			MTIF2		USP12	KLHDC8A
CEBPB	EFNA3		PXN				TMED2	SMC2	ANXA1		CD302	OPN3	TPSAB1		ATP6AP1			BANK1	MPZL2			IRF7			SEC11A	SSRP1	HNRNPU		FBLN2	IL18R1	UPP1	GLUL	CPT1A	SDHC		UPP1	FKBP4	APBB2		DCUN1D1	GNB2	IL1RL1			GZMA		CPE	CNTFR
TRIP10	CP		BCAR1				STX3	RBM14	TOP2A		ATL2	ABHD2	TSTA3		CLU			TOR1B	WNK4			CD55			BCAT1	NAP1L1	HDDC2		MSX1	IL10	BCAR1	CYP4A22	SLC25A20	NASP		CD81	STIP1	PIK3CD		ALDH1L1	ARF4	MYO1C			AARS		SPARCL1	IL5
F2RL1	KLF7		CD2AP				RAE1	RPA2	ISG20		AGPAT6	AR	FGFR3		ACSL1			RBCK1	NFASC			HSPA5			PSMB5	ANP32E	PSMD3		PTX3	KCNA3	CBR1	GABARAPL1	MTRR	AURKA		LIF	EIF5	DLC1		DCAF10		IFNGR1			CD96		ABCB1	NPHS1
KLF9	CTGF		AKAP13				UMPS	SQLE	SLC20A1		LPCAT3	SLC39A6	SGK1		COL1A1			PDE4B	PIK3R3			GNB2			PSMD13	HMGB3	RRM1		FZD8	HAS2	APOE	AQP7	COX17	B3GNT3		RPL36	ENO2	MT1E		YPEL5		PLIN2			CSK		USH1C	SCGB1A1
LDLR	CHST3		HDAC6				EIF1B	ORC6	MADD		TKT	SYT12	ID2		MRAS			MVP	SDC3			DYRK2			PGM1	IPO7	SF3A1		JUN	DCBLD2	SLC12A4	CYP1A1	CYB5R3	ISG20		FAM162A	GPX3	DBP		SEC14L1		IL18R1			HIF1A		CSF2RA	CCDC106
TGIF1	TPD52		AZI1				AK3	CDK4	PPP2R5B		UQCRC1	CD44	GALE		PDE4DIP			IL7	SIRPA			PLA2G7			PLK1	RAD21	LSM7		FERMT2	LAMP3	TMEM97	PRDX6	TOMM22	LDHC		RNF19B	PRKACA	HAS2		USP15		AHNAK			CCL2		BTBD3	PAX3
RNF19B	LXN		LLGL1				NUDT21	POLE	BCAP31		CAT	MED24	BATF		AGL			BPGM	GRB7			S100A12			GLRX	CDK4	ERH		DKK1	VIP	SLC46A3	ERP29	ACAT1	ARPP19		CDK5R1	PRKCD	SLC22A18		RIOK3		PRKCH			ICOSLG		IL2RG	VPREB1
DRAM1	B4GALNT2		ATG4B				RBX1	RASAL2	ERBB3		OMD	BCL11B	MAPK13		ERBB3			FTSJD2	FLNC			GRB2			COPS5	CDKN1A	RPL14		SNAI2	CD70	PTGDS	H2AFZ	MRPS11	CENPA		STEAP3	STARD3	ICA1		SIDT2		TNFRSF8			NPM1		DNMBP	TSHB
B4GALT1	PPARGC1A		PCNT				SRSF6	HOXC10	NEDD9		DLAT	CANT1	FABP5		GABARAPL2			AUTS2	PARD6G			PHEX			ETF1	BRMS1L	PSMB3		DST	RGS1	MPP2	GAPDHS	ATP6V0C	HOMER1		PITPNC1	MARK2			FOXJ2		SYNGR2			IL4R		IL10RA	CACNA1F
DNAJB4	BCL2		ALMS1				GMPR2	RPS6KA5	SAT1		MRPL15	KRT13	MEST		CAV3			B2M	COL9A1			GNGT2			GSK3B	CTPS	IFRD1		TPM4	SLC31A1	PTGR1	DHCR24	PDK4	BIK		SLC35D1	SLC6A12			TCEA1		GALM			CCL11		EREG	AKR1B10
CSF2	GCNT2		CRIPAK				DCTN4	CUL4A	PDCD4		RIOK3	KRT15	JAK1		BHLHE40			RIPK2	NRXN2			DOCK4			NUP205	RAD50	NCBP2		DCN	ADRM1	AQP9	GAD2	TIMM10	CYB5A		TPRKB	SQSTM1			VEZF1		POU2F1			NME1		SLMO2	P2RX6
PDE4B	HAS1		KPTN				COX17	SLC7A1	BCL2L2		RTN3	TOB1	CYP4F11		PPP1R3C			CD69	ZAK			MMP12			SORD	TRA2B	GLO1		GJA1	KCNMB2	EPHA2	PTPRG	LDHA	HAX1		RRP8	PTPRD			LPIN2		EOMES			FLNA		EPHB2	KRT15
SNN	KLHL24		DST				CMPK2	FOXN3	FEZ1		CHUK	SLC7A2	KCNK5		LARGE			MYD88	SLC30A3			KCNIP3			PHGDH	CSE1L	NDUFAB1		PMP22	SERPINE1	PSMB10	IL4I1	ECI1	COG2		IL1A	MAPK8IP2			PC		NOP2			GPR65		FBXO4	PAX4
PLEK	SCARB1		KIFAP3				CCNO	HMGA1	ERBB2		G3BP2	LAD1	CPE		LPIN1			PSMA2	RHOF			FDX1			GMPS	PAICS	CUL1		IGFBP4	MXD1	FAS	TP53INP2	MRPL11	IL13RA1		PMM1	CDK2			HBBP1		PTRH2			ACHE		CROT	BTG2
STAT5A	SLC25A1		PPP4R2					SS18	DNAJA1		SDHC	TUBB2B	XRCC3		CDH13			PIM1	BMP1			TIMP2			RRP9	STAG1	NHP2		COPA	AXL	ACOX1	PDHA1	FXN	NOL3		TPD52L1	ONECUT1			CDR2		RHOH			EIF3D		MPZL2	GPR3
DENND5A	SDC2		ARHGAP29					TRAIP	DAP3		SAMM50	TBC1D30	CXCL14		NQO1			NOD1	MMP2			MMP8			EEF1E1	LUC7L3	CLNS1A		LRP1	MEFV	GART	RAP1GDS1	MRPS12	CLDN3		IFI30	RFC4			CCND3		CDC6			IGSF6		ANKH	GRID2
CCND1	CASP6		RASAL2					PRMT5	DPYD		ARL4A	SEC14L2	SCUBE2		PRNP			CFH	ICAM5			FCER1G			LTA4H	PPM1D	TRIM28		ITGA2	PVR	HPRT1	CEL	COX10	AGRN		GM2A	CA2			SLC25A38		MYO1E			F2R		CBR4	TCL1A
DDX58	VHL		CCNB2					CUL5	NEFH		SNCG	ENDOD1	CDC20		PSEN2			TAPBP	VWF			ZFYVE20			SDF2L1	NME1	RSL1D1		FLNA	CCL24	PGD	BLVRA	RHOT1	CLN6		RPS12	TACR3			FAM46C		CXCL10			IL13		DOCK2	PLAG1
SPHK1	FOXO3		PIF1					DDX39A	PAK1		PDCD4	HR	IL6ST		DAPK2			SLC25A28	MYH9			ANXA5			FKBP2	SRSF2	HNRNPC		MFAP5	PDE4B	ABCC3	SERINC1	ACAA1	TXN		EPS8L2	AMD1			FBXO34		SNX14			TAP1		GPRC5B	PKP1
CD80	PDGFB		RASA2					MARCKS	FDXR		COQ9	SCARB1	GINS2		LSP1			PTPN1	CD209			CTSL2			RDH11	XPO1	COPS5		PTHLH	LCP2	SMOX	BMPR1B	ACADSB	PAM		TM4SF1	HNRNPU			BACH1		IRF6			DARS		RABGAP1L	IRS4
TNFAIP8	B3GALT6		NEDD9					PBK	GPX4		APLP2	NCOR2	TRIM29		SLC6A8			TNFAIP3	VCAM1			GCA			CXCR4	HNRNPD	XRCC6		TGFBR3	PDPN	TTPA	RDH11	LDHB	CAPN5		BLCAP	WIZ			NR3C1		IL10RA			IRF7		MALL	IL12B
CCNL1	SLC2A5		SMC1A					ORC5	ETF1		SOD1	RHOD	UNC13B		REEP1			SSPN	DHX16			EHD1			MLLT11	PMS2	SLC25A3		SFRP4	IRF7	HES6	ENO2	MRPS30	PKP2		MKNK2	CCK			AQP3		MAP6			ACVR2A		STRN	EPHA5
FUT4	SRPX		ACTN4					SAP30	CCNA1		PTCD3	INPP5F	LAMC2		EIF4A2			NUP93	ACTG2			PRSS3			GCLC	ASF1A	MRPL9		LGALS1	MET	GCNT2		ATP1B1	ABCB6		CD82				TRIM58		TNFSF10			CXCR3		ST6GAL1	SOX10
CCRL2	EFNA1		PKD2					KATNA1	GUCY2D		PHLDB1	PPIF	LARGE		SH2B1			MTHFD2	NEGR1			COL4A2			TCEA1	EXOSC8	POLE3		RGS4	ATP2A2	MAN1A1		BDH2	DCN		GNB2L1				LMO2		SPRED2			PRKCB		PIGR	SNN
SPSB1	GLRX		CLIP2					HNRNPD	AVPR1A		ENPP2	DHRS3	SLC2A8		MYBPC3			CDKN1A	NF1			CSRP1			MAP2K3	MLH1	POLD2		CDH6	SLC31A2	IGFBP1		SLC25A12	GMPPA		ST14				PICALM		SELL			CXCL9		VWA5A	CACNG1
TSC22D1	CXCR7		CDC42					POLA2			HSPB8	FDFT1	PLXNB1		ITGA7			IRF4	ADAM23			PIK3R5			HSPD1	NUP107	H2AFZ		SAT1	FZD5	ITIH4		TIMM50	BPNT1		TCHH				NCOA4		SERPINC1			PTPN6		PSMB8	SPHK2
B4GALT5	PAM		NDC80					HIRA			AIFM1	GAB2	PRKAR2B		SPTAN1			NFKB1	PLCG1			SERPINC1			SYTL2	ORC2	AIMP2		NT5E	ITGA5	PROS1		MRPL34	ANG		HDAC3				GDE1		CDCP1			NCF4		F13A1	IGFBP2
SIK1	TGFBI		TLK1					HIF1A			CCNG2	UNC119	RPS6KA2		SORBS3			BATF2	KCNH2			ANG			MCM4	TP53	NOP56		DPYSL3	SGMS2	TPST1		ISCA1	GPR87		CCNK				SLC6A9		RORA			UBE2D1		NRP1	CAPN9
CLCF1	DCN		TAOK2					SYNCRIP			PPP1R15B	KLF10	HSPA4L		PC			HLA-B	CERCAM			APOBEC3F			PPP1R15A	TFRC	PRDX3		PPIB	MARCO	LEAP2		MRPL35	GAL3ST1		RHBDF2				NNT		COCH			LIF		SOX9	TCF7L1
NFE2L2	SIAH2		TBCD					TLE3			MDH2	HES1	TFPI2		SCD			LATS2	NRTN			GATA3			USO1	HMGA1	MRPS18B		TGM2	CD14	NFS1		IDH1	ALDH7A1		NUDT15				ARHGEF12		CSF1			CCR1		JUP	TGFB2
FOSB	PLAC8		CAPZB					NCL			ABCA1	FKBP5	SERPINA1		GNAO1			IRF5	IKBKG			DUSP5			NFKBIB	PSIP1	EPRS		SGCG	EIF2AK2	PGRMC1		HSPA9	NT5E		TGFA				PPP2R5B		F2RL2			MBL2		ELTD1	SMPX
PER1	FBP1		DOCK2					RAD23B			COX7B	SLC2A1	TNNC1		STC2			SLAMF7	DSC3			CASP3			UNG	DDX39A	KPNA2		ITGB3	ROS1	CYP17A1		MRPL15	IDH1		ISCU				C3		UCK2			DEGS1		ZNF277	LYPD3
NFAT5	TPST2		CTTN					E2F2			MYLK	AMFR	HMGCS2		CFD			ISOC1	ACTB			USP16			GTF2H1	SNRPB	HSP90AB1		PDLIM4	ATP2C1	ARPP19		MRPS15	PYGL		LDHB				42796		CA2			TPD52		EPB41L3	PNMT
ATP2B1	PHKG1		SMC4					EGF			COX8A	NADSYN1	ALDH3A2		RB1			P2RY14	TUBG1			CP			RPA1	CDKN1B	RPL34		CTHRC1	NDP	SERTAD1		TOMM70A	NDUFV3		TNNI1				UCP2		IFITM3			AKT1		PCSK1N	SYNPO
IL12B	MYH9		ARFGEF1					HMGN2			DHRS7B	INHBB	CD9		BAG1			STAT3	PPP2R2C			PSEN1			HSP90B1	MTHFD2	SRPK1		ECM2	BTG2	ARG2		TCIRG1	NDST3		FGF13				SYNJ1		UMPS			RIPK2		FUCA1	MX1
IL6ST	CDKN1C		TUBA4A					SRSF10			FAM73B	BHLHE40	IDH2		ABLIM1			NCOA3	HRAS			LIPA			ERO1L	WEE1	MAD2L1		CRLF1	MSR1	HNF4A		ISCU	PPP2CB		RXRA				FN3K		HUWE1			IKBKB		PLVAP	IFNG
SLC16A6	GRHPR		LMNB1					SNRPD1			MGLL	CALB2	SORD		PTGIS			HLA-A	MMP9			PCSK9			GSR	PRDX4	DHX15		AREG	PTPRE	REG1A		POLR2F	PSMC4		APP				ABCG2		COL6A1			GCNT1		ADAM17	NR6A1
ABCA1	PCK1		ABI1					CASP8AP2			ITSN1	FASN	MDK		MAPRE3			IL6	TNFRSF11B			DGKG			PITPNB	PHF5A	MCM4		IL15	RNF144B	CCL25		NQO2	TPBG		F2R				DAAM1		ABCB1			SOCS5		AVL9	ACTC1
HES1	INHA		ROCK1					SMARCC1			DHCR7	CHPT1	ALDH3B1		OCEL1			GZMA	PKD1			GNG2			EPRS	TBRG4	RPS5		MCM7	PCDH7	PEMT		NDUFC2	TGFBI		CLCA2				AGPAT4		RNH1			IRF8		ADAMDEC1	RSAD2
BCL6	HSPA5		CEP192					SLC12A2			RREB1	MYBBP1A	PTGER3		SH3BGR			IFNAR2	CDK8			ME1			SRD5A1	SHMT1	CCT7		GAS1	SPHK1	ACO2		MRPS22	GALK2		CGRRF1				CCDC28A		IRF8			TAP2		HKDC1	ADRA2C
IRS2	NDST2		BUB1					NOTCH2			CMBL	ELOVL5	RABEP1		NOTCH1			CD74	FYB			GMFB			TUBG1	PRPS1	HDGF		PRSS2	IL18RAP	LONP1		POR	CTH		CSRNP2				GMPS		GUCY1B3			EIF4G3		MAP7	BARD1
SLC2A3	NEDD4L		GEMIN4					TNPO2			UBC	DYNLT3	KLF4		TSC2			RAPGEF6	AMIGO1			SCG3			MTHFD2L	DIAPH3	RPS6		CADM1	RTP4	NMT1		ATP6V0E1	KIF2A		ACVR1B				ACP5		AHCY			ABI1		IL7R	HTR1B
CEBPD	TPBG		PLEKHG2					SMAD3			ATP5O	ABLIM1	PPIF		TGFB1			CASP4	CD276			PPP4C			ADIPOR2	NUP153	SNRPB2		OXTR	RAF1	PTGES3		PHYH	CACNA1H		BMP2				SLC10A3		PRAF2			CCL7		RBM4	FGF16
IL23A	XPNPEP1		RICTOR					ZAK			PRDX3	SOX3	SNX10		FDPS			FAS	GAMT			CCL5			NUFIP1	PSMC3IP	PSMC4		SCG2	CHST2	F10		BRP44L	ANKZF1		GPX2				ALDH6A1		GSTO1			IL2RB		BPGM	ODZ2
SMAD3	IL6		BCL2L11					HSPA8			DBT	SLC24A3	METTL3		CAMK2B			OGFR	NLGN3			CTSH			CDC25A	XRCC6	CDC20		CXCL6	ITGB3	TAT		GPI	SAP30		KRT17				CIR1		TWSG1			BRCA1		ENG	CDKAL1
TAP1	SLC6A6		DYNC1H1					G3BP1			NDUFS3	RAB17	PLK4		EPHB3			ARL4A	SKAP2			F8			PDAP1	PNN	TUFM		MMP1	KIF1B	42800		AFG3L2	RBCK1		TM7SF3				RBM5		CDC42SE2			FGR		GFPT2	SHOX2
MSC	MAP3K1		FSCN1					PTTG3P			NKIRAS1	MAST4	COX6C		GADD45B			SRI	RRAS			APOA4			STARD4	HUS1	RRP9		TNFAIP3	SELE	JUP		HSD17B10	ELF3		ZBTB16				HTRA2		PLAGL1			IL18RAP		PLAU	SGK1
IFIH1	LDHC		ARHGEF7					DMD			RAB34	KCNK5	ST14		APP			LYSMD2	CAP1			IL6			BUB1	RBBP7	CDC45		CAPG	NOD2	ACP1		CASP7	RPE		PTPN14				IGSF3		APLP1			MRPL3		GNG11	RIBC2
IL15RA	AKAP12		DYNLL2					MEIS1			CIDEA	ELF1	NCOR2		APLNR			CSF2RB	EXOC4			AKAP10			ARPC5L	PDS5B	TYMS		CAP2	C5AR1	MBL2		PRDX3	B4GALT4		TSPYL2				BTRC		AKAP2			CXCL13		PTCD2	SKIL
TNIP2	TES		MYO1E					HNRNPU			UQCRQ	RPS6KA2	MOCS2		ITGB4			ST3GAL5	ACTA1			ERAP2			GPI	NOP56	ILF2		MXRA5	EMP3	TGFB2		MGST3	DEPDC1		SLC3A2				PGLS		PPAP2A			CAPG		MAP3K1	NGB
BCL3	KIF5A		BIN1					SRSF2			PEX14	ISG20L2	NMU		SOD3			C1R	TIAL1			VCPIP1			EIF2S2	MXD3	VDAC3		FOXC2	CLEC5A	ENPEP		HTRA2	RRAGD		S100A4				PQLC1		SPRY4			EIF5A		CBL	ASB7
PANX1	LALBA		NOTCH2					MT2A			BCL6	IL6ST	TH		FOXO4			CASP3	LDLRAP1			HSPA1A			CD9	PPP1R8	IMPDH2		NTM	TACR3	HSD17B2		BCKDHA	IER3		GLS2				SDCBP		SCN9A			RPS3A		CXCR4	MYO15A
FJX1	COL5A1		RFC1					NUP98			COX6A1	SYNGR1	RNASEH2A		EFS			CMKLR1	VAV2			RAF1			ATP2A2	GSPT1	SF3B3		ENO2	SLC4A4	ANGPTL3		LRPPRC	ALDH9A1		CCND3				LRP10		SHE			GALNT1		NIN	SLC5A5
EDN1	GPC1		PDLIM5					EWSR1			DNAJB9	SH3BP5	CHST8		PFKM			NFKBIA	AKT3			NOTCH4			GGA2	CDKN2A	NOP16		FAS	MEP1A	PC		RETSAT	DLD		PRMT2				NEK7		PDCD2L			ST8SIA4		IKZF1	KRT5
EIF1	HDLBP		RHOT2					KIF5B			MAP4K3	ALDH3B1	TST		COL6A2			METTL7B	SYMPK			ADRA2B			HMBS	AK2	SRSF7		BDNF	SELS	PDLIM5		ECH1	MERTK		NHLH2				ARL2BP		CCND3			CCL13		WDR33	ZFP112
BMP2	ILVBL		SORBS2					MTF2			ANGPT1	THSD4	TOP2A		DTNA			ST8SIA4	STX4			CEBPB			RIT1	CIT	GNL3		ADAM12	LTA	CYP2E1		RHOT2	GCLC		BAIAP2				ENDOD1		LRIG1			RPL3L		MYCN	TFAP2B
DUSP4	NCAN		CDC42EP1					E2F4			UBQLN1	CLIC3	CKB		KIFC3			XCL1	PECAM1			HNF4A			SKAP2	ING3	EXOSC7		PVR	PIK3R5	BCAT1		BAX	FKBP4		RETSAT				P4HA2		SWAP70			LY75		FCER1G	CCDC132
PDLIM5	TGM2		VCL					BCL3			NDUFB7	NXT1	LTF		SPARC			IL2RB	MADCAM1			LGALS3			STIP1	HN1	MRPL23		CXCL12	STAB1	ATOH8		MTRF1	SOD1		LRMP				HTATIP2		SLC39A8			TAPBP		PECAM1	CD80
ICOSLG	ETS1		CLIP1					PURA			SLC19A1	NAV2	DUSP2		SPDEF			VAMP5	ITGA9			TNFAIP3			DAPP1	POP7	RAD23B		PDGFRB	IRF1	SLC1A5		GLUD1	MED24		HIST1H1C				SLC7A11		RABGAP1L			NOS2		FAM190B	ATP4A
GFPT2	HOXB9		STK38L					MEIS2			ABCB8	RRP12	PTPN6		SLN			IL18BP	CD86			CDH13			ABCF2	SYNCRIP	RPS10		SLIT2	ICAM4	IRF8		SUPV3L1	AK3		DNTTIP2				KHNYN		TGM2			RPL9		SNAP91	ARPP21
KLF2	SELENBP1		YWHAE					PAFAH1B1			PQLC3	ADCY1	ATP2B4		WWTR1			ZNFX1	TRO			ITIH1			NFYC	EIF2S1	PHB		NOTCH2	P2RX4	NINJ1		GRPEL1	XYLT2		MXD4				MBOAT2		PNP			BCAT1		EVI5	SERPINB2
TNC	FOSL2		RAPGEF5					WRN			POR	DHCR7	ST6GALNAC2		CD36			ARID5B	CLDN5			TFPI2			ATP5G1	LYAR	DDX21		GLT25D1	ABI1	AP4B1		PDP1	ARTN		SEC61A1				ATP6V0A1		AGER			IL9		TNFRSF1B	TLX1
SERPINB8	SULT2B1		CEP72					H2AFV			UCP2	MICB	ADD3		ADCY9			APOL6	MPZL1			PIK3CG			PFKL	PAN2	CYC1		GPX7	CX3CL1	ACSM1		ALDH6A1	PPIA		HMOX1				CAST		ETV4			IL27RA		GPNMB	EFHD1
MXD1	TGFB3		CSNK1D					ODF2			UQCR11	AKAP1	DYNLT3		APOD			STAT4	WASL			S100A13			CCT6A	SPC24	PABPC1		WIPF1	SLC28A2	ITIH1		OAT	CHST4		RAD9A				TYR		CD86			DYRK3		TPH1	P2RY4
[truncated: 4 more columns]

## Sheet: GSEA results
UPREGULATED IN A375 MELANOMA CELLS COCULTURED WITH 3T3L1 ADIPOCYTES
NAME			SIZE	ES	NES	NOM p-val	FDR q-val	FWER p-val	RANK AT MAX	LEADING EDGE
HALLMARK_MYC_TARGETS_V1			196	0.742745	2.57898	0	0	0	3322	tags=63%, list=12%, signal=71%
HALLMARK_MYC_TARGETS_V2			58	0.854237	2.4799	0	0	0	1558	tags=67%, list=6%, signal=71%
HALLMARK_E2F_TARGETS			198	0.676425	2.35568	0	0	0	5322	tags=69%, list=19%, signal=85%
HALLMARK_G2M_CHECKPOINT			196	0.614771	2.13664	0	0	0	4318	tags=53%, list=16%, signal=62%
HALLMARK_DNA_REPAIR			141	0.589078	1.97955	0	0.0001	0.001	4665	tags=55%, list=17%, signal=66%
HALLMARK_UNFOLDED_PROTEIN_RESPONSE			109	0.444947	1.44658	0.00913242	0.0207688	0.223	2696	tags=36%, list=10%, signal=40%
HALLMARK_MITOTIC_SPINDLE			196	0.393866	1.38447	0.00479616	0.0344655	0.394	3854	tags=34%, list=14%, signal=39%
HALLMARK_P53_PATHWAY			195	0.388266	1.35843	0.0153173	0.039543	0.486	3587	tags=36%, list=13%, signal=41%
HALLMARK_OXIDATIVE_PHOSPHORYLATION			198	0.362959	1.27564	0.0371179	0.0743151	0.756	3981	tags=36%, list=14%, signal=42%
HALLMARK_WNT_BETA_CATENIN_SIGNALING			40	0.382711	1.0494	0.370062	0.366198	1	2948	tags=28%, list=11%, signal=31%
HALLMARK_TGF_BETA_SIGNALING			53	0.351669	1.01571	0.416318	0.404377	1	1610	tags=23%, list=6%, signal=24%
DOWNREGULATED IN A375 MELANOMA CELLS COCULTURED WITH 3T3L1 ADIPOCYTES
NAME			SIZE	ES	NES	NOM p-val	FDR q-val	FWER p-val	RANK AT MAX	LEADING EDGE
HALLMARK_CHOLESTEROL_HOMEOSTASIS			71	-0.781945	-2.25565	0	0	0	1232	tags=54%, list=4%, signal=56%
HALLMARK_MTORC1_SIGNALING			195	-0.616706	-2.07837	0	0	0	2684	tags=43%, list=10%, signal=47%
HALLMARK_GLYCOLYSIS			191	-0.608892	-2.0615	0	0	0	2513	tags=41%, list=9%, signal=45%
HALLMARK_PEROXISOME			98	-0.626688	-1.936	0	0.000443182	0.001	2912	tags=38%, list=11%, signal=42%
HALLMARK_HYPOXIA			191	-0.557256	-1.88505	0	0.000871212	0.003	2579	tags=42%, list=9%, signal=46%
HALLMARK_ANDROGEN_RESPONSE			97	-0.614664	-1.88379	0	0.00072601	0.003	1895	tags=31%, list=7%, signal=33%
HALLMARK_MYOGENESIS			181	-0.536214	-1.77778	0	0.00149238	0.007	3473	tags=34%, list=13%, signal=38%
HALLMARK_FATTY_ACID_METABOLISM			149	-0.527533	-1.71567	0	0.00295874	0.016	2232	tags=29%, list=8%, signal=31%
HALLMARK_COAGULATION			117	-0.545295	-1.7107	0.00190114	0.00276131	0.017	2235	tags=28%, list=8%, signal=31%
HALLMARK_ESTROGEN_RESPONSE_LATE			191	-0.499182	-1.67452	0	0.00390914	0.027	2419	tags=29%, list=9%, signal=31%
HALLMARK_BILE_ACID_METABOLISM			103	-0.521273	-1.62978	0	0.00590219	0.044	2653	tags=29%, list=10%, signal=32%
HALLMARK_INTERFERON_ALPHA_RESPONSE			93	-0.51806	-1.60964	0.00373832	0.00637492	0.051	3381	tags=32%, list=12%, signal=37%
HALLMARK_INTERFERON_GAMMA_RESPONSE			186	-0.479749	-1.59551	0	0.00677754	0.058	2536	tags=25%, list=9%, signal=28%
HALLMARK_ESTROGEN_RESPONSE_EARLY			195	-0.470982	-1.58909	0	0.00695113	0.064	2424	tags=30%, list=9%, signal=33%
HALLMARK_APICAL_SURFACE			42	-0.570686	-1.52824	0.0144628	0.0149665	0.148	2876	tags=36%, list=10%, signal=40%
HALLMARK_ADIPOGENESIS			186	-0.451966	-1.51246	0.00183486	0.016025	0.166	3897	tags=37%, list=14%, signal=43%
HALLMARK_APICAL_JUNCTION			183	-0.436506	-1.4649	0.00530035	0.0255002	0.264	2040	tags=22%, list=7%, signal=24%
HALLMARK_EPITHELIAL_MESENCHYMAL_TRANSITION			191	-0.43218	-1.45874	0.00179211	0.0255357	0.281	2678	tags=35%, list=10%, signal=38%
HALLMARK_HEME_METABOLISM			184	-0.425899	-1.41187	0.011925	0.0394329	0.417	4023	tags=39%, list=15%, signal=45%
HALLMARK_KRAS_SIGNALING_UP			178	-0.425222	-1.40448	0.00537634	0.0402342	0.44	2895	tags=26%, list=11%, signal=29%
HALLMARK_HEDGEHOG_SIGNALING			34	-0.529902	-1.38945	0.0612245	0.0443327	0.487	3258	tags=32%, list=12%, signal=37%
HALLMARK_APOPTOSIS			153	-0.417565	-1.37818	0.0128205	0.0464232	0.523	2147	tags=26%, list=8%, signal=28%
HALLMARK_KRAS_SIGNALING_DN			158	-0.401667	-1.33008	0.0287253	0.0708606	0.688	5134	tags=26%, list=19%, signal=32%
HALLMARK_NOTCH_SIGNALING			30	-0.522126	-1.32444	0.109434	0.0709122	0.7	4183	tags=47%, list=15%, signal=55%
HALLMARK_IL2_STAT5_SIGNALING			189	-0.395736	-1.31945	0.0297723	0.0712013	0.713	3085	tags=28%, list=11%, signal=31%
HALLMARK_ANGIOGENESIS			34	-0.490394	-1.2796	0.136194	0.0985419	0.832	2876	tags=32%, list=10%, signal=36%
HALLMARK_UV_RESPONSE_DN			141	-0.398762	-1.2752	0.0568807	0.098174	0.843	2844	tags=29%, list=10%, signal=32%
HALLMARK_ALLOGRAFT_REJECTION			171	-0.389334	-1.27077	0.0559702	0.0993834	0.859	1682	tags=16%, list=6%, signal=17%
HALLMARK_UV_RESPONSE_UP			154	-0.386079	-1.25446	0.0766488	0.111247	0.897	3913	tags=36%, list=14%, signal=42%
HALLMARK_XENOBIOTIC_METABOLISM			189	-0.377338	-1.25275	0.0571429	0.109155	0.9	2273	tags=23%, list=8%, signal=25%
HALLMARK_TNFA_SIGNALING_VIA_NFKB			193	-0.371944	-1.24926	0.056314	0.108061	0.909	2622	tags=33%, list=10%, signal=36%
HALLMARK_IL6_JAK_STAT3_SIGNALING			81	-0.412128	-1.23743	0.130019	0.115979	0.933	4239	tags=32%, list=15%, signal=38%
HALLMARK_COMPLEMENT			175	-0.351767	-1.17457	0.122164	0.179489	0.99	2679	tags=25%, list=10%, signal=27%
HALLMARK_REACTIVE_OXIGEN_SPECIES_PATHWAY			45	-0.409045	-1.12766	0.285985	0.245488	1	2838	tags=31%, list=10%, signal=35%
HALLMARK_PI3K_AKT_MTOR_SIGNALING			98	-0.338218	-1.04406	0.364839	0.395597	1	3081	tags=22%, list=11%, signal=25%
HALLMARK_INFLAMMATORY_RESPONSE			179	-0.309124	-1.0259	0.381371	0.425381	1	1886	tags=14%, list=7%, signal=15%
HALLMARK_PROTEIN_SECRETION			95	-0.312299	-0.968944	0.525641	0.551535	1	3849	tags=27%, list=14%, signal=32%
HALLMARK_SPERMATOGENESIS			113	-0.307003	-0.962722	0.536332	0.551504	1	3563	tags=18%, list=13%, signal=20%
HALLMARK_PANCREAS_BETA_CELLS			31	-0.261693	-0.671372	0.941065	0.988893	1	4251	tags=19%, list=15%, signal=23%
